# Supplementary material for: Occupational inhalable agents constitute major risk factors for rheumatoid arthritis, particularly in the context of genetic predisposition and smoking
Source: PubMed Central journal article supplement — Ann Rheum Dis. 2022 Dec 6;82(3):316–23. doi: 10.1136/ard-2022-223134 (PMC9933179; doi:10.1136/ard-2022-223134), 2022-12-06
Supplement: ard-2022-223134supp001.pdf [file ard-2022-223134supp001.pdf]

**Supplementary Figure 1. Pairwise correlation of 16 independent occupational inhalable agents identified after clumping.**

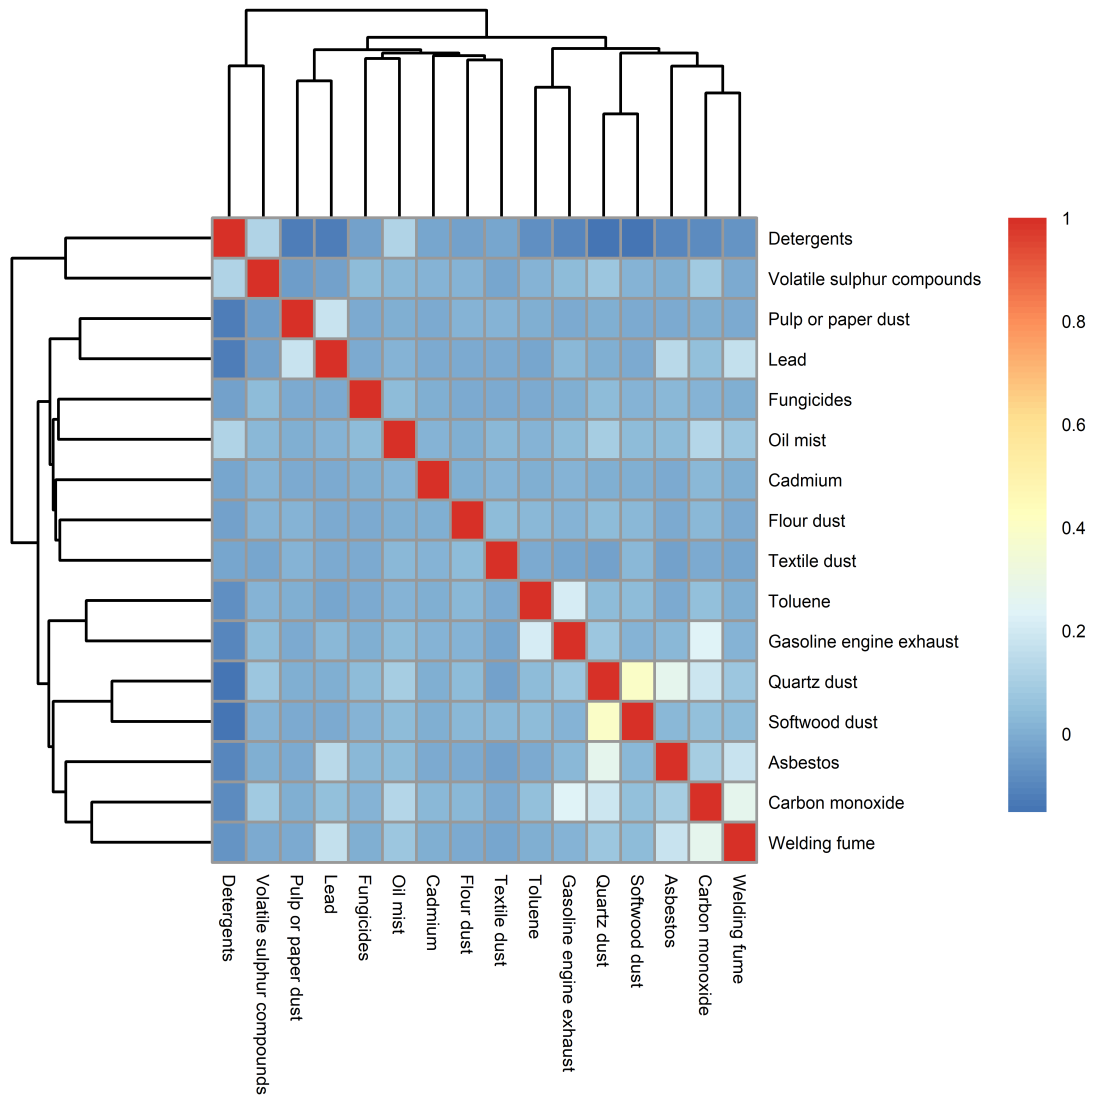

**Supplementary Figure 2. Associations between occupational inhalable agents and the risk for overall RA.** Estimates were adjusted for age, sex, residential area, smoking (ever / never smoking or pack-years), alcohol drinking, education, and body mass index.

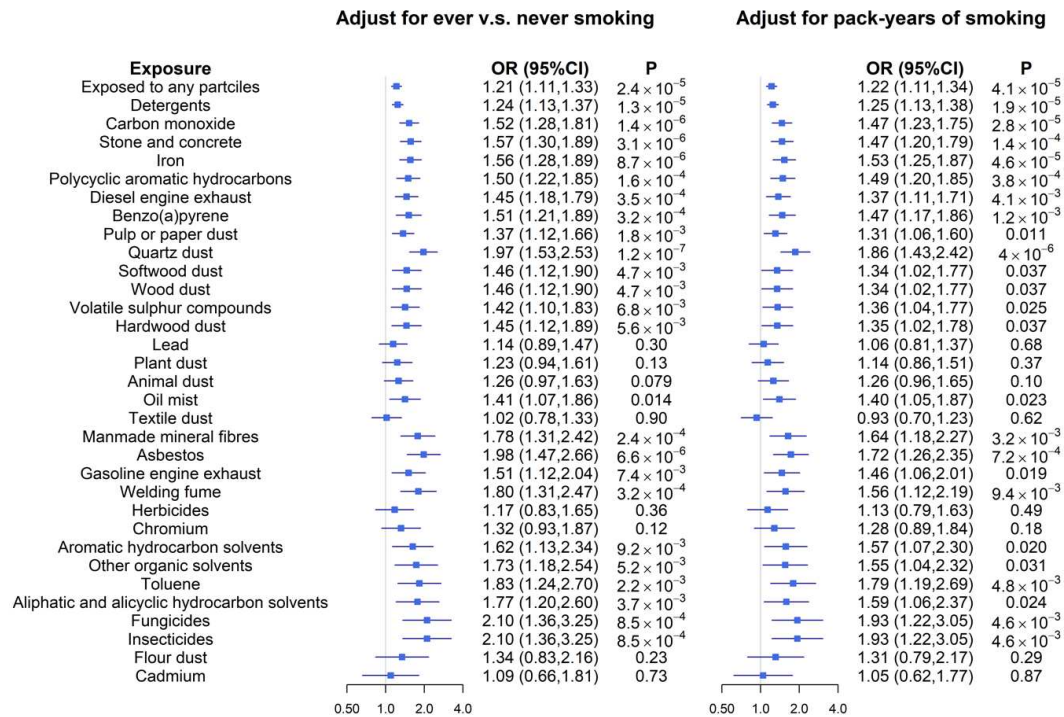

**Supplementary Table 1. Primary associations of occupational inhalable agents with risk for overall RA, ACPA-positive subtype, and ACPA-negative subtype.** Estimates were adjusted for age, sex, residential areas, smoking, alcohol drinking, education, and body mass index.

| Exposure                                     | Overall RA            |                    |                            | ACPA-positive subtype |                    |                            | ACPA-negative subtype |                    |                            |
|----------------------------------------------|-----------------------|--------------------|----------------------------|-----------------------|--------------------|----------------------------|-----------------------|--------------------|----------------------------|
|                                              | N<br>(case / control) | OR (95%CI)         | P                          | N<br>(case / control) | OR (95%CI)         | P                          | N<br>(case / control) | OR (95%CI)         | P                          |
| <b>Not exposed to any agents (Ref.)</b>      | 1098/2114             | <b>1.00 (Ref.)</b> |                            | 714/2114              | <b>1.00 (Ref.)</b> |                            | 384/2114              | <b>1.00 (Ref.)</b> |                            |
| Exposed to any agents                        | 2935/4371             | 1.21 (1.11,1.33)   | <b>2.4×10<sup>-5</sup></b> | 1928/4371             | 1.25 (1.12,1.38)   | <b>3.9×10<sup>-5</sup></b> | 1007/4371             | 1.18 (1.03,1.34)   | 0.016                      |
| Detergents                                   | 1980/2792             | 1.24 (1.13,1.37)   | <b>1.3×10<sup>-5</sup></b> | 1308/2792             | 1.27 (1.13,1.42)   | <b>3.7×10<sup>-5</sup></b> | 672/2792              | 1.22 (1.06,1.41)   | <b>6.8×10<sup>-3</sup></b> |
| Carbon monoxide                              | 577/655               | 1.52 (1.28,1.81)   | <b>1.4×10<sup>-6</sup></b> | 385/655               | 1.67 (1.37,2.04)   | <b>3.9×10<sup>-7</sup></b> | 192/655               | 1.35 (1.06,1.73)   | <b>0.020</b>               |
| Stone and concrete                           | 467/494               | 1.57 (1.30,1.89)   | <b>3.1×10<sup>-6</sup></b> | 298/494               | 1.71 (1.37,2.13)   | <b>1.8×10<sup>-6</sup></b> | 169/494               | 1.39 (1.07,1.81)   | <b>0.010</b>               |
| Iron                                         | 409/453               | 1.56 (1.28,1.89)   | <b>8.7×10<sup>-6</sup></b> | 272/453               | 1.73 (1.38,2.17)   | <b>2.3×10<sup>-6</sup></b> | 137/453               | 1.34 (1.02,1.78)   | <b>0.040</b>               |
| Polycyclic aromatic hydrocarbons             | 308/356               | 1.50 (1.22,1.85)   | <b>1.6×10<sup>-4</sup></b> | 206/356               | 1.71 (1.34,2.19)   | <b>1.5×10<sup>-5</sup></b> | 102/356               | 1.24 (0.92,1.68)   | 0.16                       |
| Diesel engine exhaust                        | 299/337               | 1.45 (1.18,1.79)   | <b>3.5×10<sup>-4</sup></b> | 200/337               | 1.69 (1.34,2.14)   | <b>1.2×10<sup>-5</sup></b> | 99/337                | 1.16 (0.86,1.56)   | 0.33                       |
| Benzo(a)pyrene                               | 263/306               | 1.51 (1.21,1.89)   | <b>3.2×10<sup>-4</sup></b> | 176/306               | 1.75 (1.35,2.27)   | <b>2.8×10<sup>-5</sup></b> | 87/306                | 1.22 (0.88,1.69)   | 0.23                       |
| Pulp or paper dust                           | 239/308               | 1.37 (1.12,1.66)   | 1.8×10 <sup>-3</sup>       | 173/308               | 1.57 (1.26,1.96)   | <b>5.6×10<sup>-5</sup></b> | 66/308                | 1.02 (0.75,1.39)   | 0.90                       |
| Quartz dust                                  | 243/221               | 1.97 (1.53,2.53)   | <b>1.2×10<sup>-7</sup></b> | 154/221               | 2.18 (1.63,2.94)   | <b>2.2×10<sup>-7</sup></b> | 89/221                | 1.72 (1.22,2.44)   | <b>2.0×10<sup>-3</sup></b> |
| Softwood dust                                | 162/200               | 1.46 (1.12,1.90)   | 4.7×10 <sup>-3</sup>       | 99/200                | 1.57 (1.15,2.14)   | 4.8×10 <sup>-3</sup>       | 63/200                | 1.34 (0.93,1.93)   | 0.12                       |
| Wood dust                                    | 162/200               | 1.46 (1.12,1.90)   | 4.7×10 <sup>-3</sup>       | 99/200                | 1.57 (1.15,2.14)   | 4.8×10 <sup>-3</sup>       | 63/200                | 1.34 (0.93,1.93)   | 0.12                       |
| Volatile sulphur compounds                   | 168/191               | 1.42 (1.10,1.83)   | 6.8×10 <sup>-3</sup>       | 108/191               | 1.56 (1.16,2.09)   | 3.2×10 <sup>-3</sup>       | 60/191                | 1.22 (0.85,1.74)   | 0.28                       |
| Hardwood dust                                | 159/197               | 1.45 (1.12,1.89)   | 5.6×10 <sup>-3</sup>       | 97/197                | 1.56 (1.14,2.13)   | 5.7×10 <sup>-3</sup>       | 62/197                | 1.34 (0.93,1.93)   | 0.12                       |
| Lead                                         | 136/205               | 1.14 (0.89,1.47)   | 0.30                       | 95/205                | 1.34 (1.01,1.79)   | 0.040                      | 41/205                | 0.86 (0.59,1.26)   | 0.44                       |
| Plant dust                                   | 136/182               | 1.23 (0.94,1.61)   | 0.13                       | 85/182                | 1.33 (0.97,1.81)   | 0.080                      | 51/182                | 1.07 (0.73,1.56)   | 0.73                       |
| Animal dust                                  | 131/181               | 1.26 (0.97,1.63)   | 0.080                      | 80/181                | 1.26 (0.93,1.70)   | 0.14                       | 51/181                | 1.24 (0.86,1.78)   | 0.25                       |
| Oil mist                                     | 133/161               | 1.41 (1.07,1.86)   | 0.010                      | 90/161                | 1.68 (1.22,2.30)   | <b>1.5×10<sup>-3</sup></b> | 43/161                | 1.10 (0.74,1.65)   | 0.63                       |
| Textile dust                                 | 118/169               | 1.02 (0.78,1.33)   | 0.90                       | 76/169                | 1.05 (0.77,1.43)   | 0.75                       | 42/169                | 0.99 (0.67,1.46)   | 0.97                       |
| Manmade mineral fibres                       | 135/139               | 1.78 (1.31,2.42)   | <b>2.4×10<sup>-4</sup></b> | 85/139                | 2.12 (1.47,3.06)   | <b>5.3×10<sup>-5</sup></b> | 50/139                | 1.41 (0.93,2.16)   | 0.11                       |
| Asbestos                                     | 143/130               | 1.98 (1.47,2.66)   | <b>6.6×10<sup>-6</sup></b> | 88/130                | 2.22 (1.56,3.15)   | <b>9.5×10<sup>-6</sup></b> | 55/130                | 1.75 (1.17,2.59)   | <b>5.8×10<sup>-3</sup></b> |
| Gasoline engine exhaust                      | 116/126               | 1.51 (1.12,2.04)   | 7.4×10 <sup>-3</sup>       | 75/126                | 1.79 (1.26,2.53)   | <b>1.0×10<sup>-3</sup></b> | 41/126                | 1.20 (0.78,1.85)   | 0.39                       |
| Welding fume                                 | 111/111               | 1.80 (1.31,2.47)   | <b>3.2×10<sup>-4</sup></b> | 74/111                | 2.13 (1.47,3.08)   | <b>6.7×10<sup>-5</sup></b> | 37/111                | 1.39 (0.89,2.19)   | 0.15                       |
| Herbicides                                   | 69/110                | 1.17 (0.83,1.65)   | 0.36                       | 41/110                | 1.21 (0.81,1.83)   | 0.35                       | 28/110                | 1.07 (0.66,1.72)   | 0.78                       |
| Chromium                                     | 69/92                 | 1.32 (0.93,1.87)   | 0.12                       | 47/92                 | 1.57 (1.05,2.33)   | 0.030                      | 22/92                 | 1.06 (0.63,1.79)   | 0.81                       |
| Aromatic hydrocarbon solvents                | 72/73                 | 1.62 (1.13,2.34)   | 9.2×10 <sup>-3</sup>       | 47/73                 | 1.94 (1.28,2.94)   | 1.9×10 <sup>-3</sup>       | 25/73                 | 1.29 (0.77,2.16)   | 0.33                       |
| Other organic solvents                       | 64/63                 | 1.73 (1.18,2.54)   | 5.2×10 <sup>-3</sup>       | 41/63                 | 1.93 (1.24,3.01)   | 3.4×10 <sup>-3</sup>       | 23/63                 | 1.49 (0.88,2.55)   | 0.14                       |
| Toluene                                      | 65/61                 | 1.83 (1.24,2.70)   | 2.2×10 <sup>-3</sup>       | 43/61                 | 2.24 (1.44,3.48)   | <b>3.3×10<sup>-4</sup></b> | 22/61                 | 1.44 (0.83,2.48)   | 0.20                       |
| Aliphatic and alicyclic hydrocarbon solvents | 64/62                 | 1.77 (1.20,2.60)   | 3.7×10 <sup>-3</sup>       | 41/62                 | 1.98 (1.27,3.08)   | 2.5×10 <sup>-3</sup>       | 23/62                 | 1.54 (0.90,2.63)   | 0.11                       |
| Fungicides                                   | 50/42                 | 2.10 (1.36,3.25)   | <b>8.5×10<sup>-4</sup></b> | 34/42                 | 2.38 (1.46,3.87)   | <b>4.9×10<sup>-4</sup></b> | 16/42                 | 1.79 (0.97,3.31)   | 0.060                      |
| Insecticides                                 | 50/42                 | 2.10 (1.36,3.25)   | <b>8.5×10<sup>-4</sup></b> | 34/42                 | 2.38 (1.46,3.87)   | <b>4.9×10<sup>-4</sup></b> | 16/42                 | 1.79 (0.97,3.31)   | 0.060                      |
| Flour dust                                   | 35/44                 | 1.34 (0.83,2.16)   | 0.23                       | 20/44                 | 1.36 (0.77,2.41)   | 0.30                       | 15/44                 | 1.24 (0.65,2.36)   | 0.52                       |
| Cadmium                                      | 29/41                 | 1.09 (0.66,1.81)   | 0.73                       | 22/41                 | 1.36 (0.78,2.36)   | 0.28                       | 7/41                  | 0.75 (0.32,1.73)   | 0.50                       |

**Supplementary Table 2. Associations of occupational inhalable agents with risk for RA, stratified by sex.** Estimates were adjusted for age, residential areas, smoking, alcohol drinking, education, and body mass index. The sex difference regarding the risk of developing RA was tested by adding an interaction term between sex and exposure to any occupational inhalable agents in one logistical regression model, and the P value for the interaction term was used as an indicator for sex difference.

| Sex                         | Exposure                         | Overall RA            |                  |                      | ACPA-positive subtype |                  |                      | ACPA-negative subtype |                  |       |
|-----------------------------|----------------------------------|-----------------------|------------------|----------------------|-----------------------|------------------|----------------------|-----------------------|------------------|-------|
|                             |                                  | N<br>(case / control) | OR (95%CI)       | P                    | N<br>(case / control) | OR (95%CI)       | P                    | N<br>(case / control) | OR (95%CI)       | P     |
| Men                         | Not exposed to any agents (Ref.) | 207/508               | 1.00 (Ref.)      |                      | 113/508               | 1.00 (Ref.)      |                      | 94/508                | 1.00 (Ref.)      |       |
|                             | Exposed to any agents            | 972/1368              | 1.40 (1.15,1.70) | 7.4×10 <sup>-4</sup> | 621/1368              | 1.66 (1.30,2.11) | 4.2×10 <sup>-5</sup> | 351/1368              | 1.14 (0.87,1.49) | 0.33  |
| Women                       | Not exposed to any agents (Ref.) | 891/1606              | 1.00 (Ref.)      |                      | 601/1606              | 1.00 (Ref.)      |                      | 290/1606              | 1.00 (Ref.)      |       |
|                             | Exposed to any agents            | 1963/3003             | 1.13 (1.02,1.25) | 0.022                | 1307/3003             | 1.13 (1.00,1.27) | 0.05                 | 656/3003              | 1.15 (0.98,1.34) | 0.083 |
| <b>P for sex difference</b> |                                  |                       | <b>0.01</b>      |                      |                       | <b>0.002</b>     |                      |                       | 0.88             |       |

**Supplementary Table 3. Exposure-response relationship between exposure to multiple occupational agents and risk of RA.** Participants were classified in to exposed to 1, 2, 3, 4, or  $\geq 5$  kinds of agents out of the 16 independent agents and compared to non-exposed group (not exposed to any of the 32 agents). Estimates were adjusted for age, sex, residential areas, smoking, alcohol drinking, education, and body mass index.

| RA               | # Agents | N<br>(case / control) | OR (95%CI)       | P                    | P <sub>trend</sub> |
|------------------|----------|-----------------------|------------------|----------------------|--------------------|
| Overall RA       | 0*       | 1098/2114             | 1.00 ref.        |                      | <b>&lt;0.001</b>   |
|                  | 1        | 1570/2418             | 1.18 (1.07,1.30) | $1.1 \times 10^{-3}$ |                    |
|                  | 2        | 587/782               | 1.31 (1.14,1.51) | $1.2 \times 10^{-4}$ |                    |
|                  | 3        | 259/279               | 1.58 (1.30,1.93) | $5.1 \times 10^{-6}$ |                    |
|                  | 4        | 116/107               | 1.76 (1.32,2.35) | $1.2 \times 10^{-4}$ |                    |
|                  | 5        | 59/40                 | 2.29 (1.50,3.51) | $1.4 \times 10^{-4}$ |                    |
| ACPA-positive RA | 0*       | 714/2114              | 1.00 ref.        |                      | <b>&lt;0.001</b>   |
|                  | 1        | 1041/2418             | 1.20 (1.07,1.35) | $1.8 \times 10^{-3}$ |                    |
|                  | 2        | 378/782               | 1.34 (1.14,1.57) | $4.3 \times 10^{-4}$ |                    |
|                  | 3        | 168/279               | 1.66 (1.32,2.08) | $1.1 \times 10^{-5}$ |                    |
|                  | 4        | 79/107                | 2.00 (1.45,2.77) | $2.6 \times 10^{-5}$ |                    |
|                  | 5        | 41/40                 | 2.70 (1.69,4.32) | $3.3 \times 10^{-5}$ |                    |
| ACPA-negative RA | 0*       | 384/2114              | 1.00 ref.        |                      | <b>&lt;0.001</b>   |
|                  | 1        | 529/2418              | 1.16 (1.00,1.35) | 0.050                |                    |
|                  | 2        | 209/782               | 1.30 (1.06,1.59) | 0.010                |                    |
|                  | 3        | 91/279                | 1.49 (1.13,1.98) | $4.9 \times 10^{-3}$ |                    |
|                  | 4        | 37/107                | 1.43 (0.95,2.17) | 0.090                |                    |
|                  | 5        | 18/40                 | 1.86 (1.03,3.36) | 0.040                |                    |

**Supplementary Table 4. Exposure-response relationship between duration of exposure to any inhalable agents and risk of RA.** Participants were grouped into five subsets within exposure duration of 0-3.3, 3.3-8.0, 8.0-15.0, 15.0-24.0, 24.0-51.0 years and compared to non-exposed group (not exposed to any of the 32 agents). Estimates were adjusted for age, sex, residential areas, smoking, alcohol drinking, education, and body mass index.

| RA               | # Quantile of exposure duration | N<br>(case / control) | OR (95%CI)       | P                    | P <sub>trend</sub> |
|------------------|---------------------------------|-----------------------|------------------|----------------------|--------------------|
| Overall RA       | 0*                              | 1098/2114             | 1.00 ref.        |                      |                    |
|                  | 1                               | 476/789               | 1.09 (0.95,1.26) | 0.21                 | <b>&lt;0.001</b>   |
|                  | 2                               | 517/769               | 1.18 (1.03,1.35) | 0.019                |                    |
|                  | 3                               | 567/704               | 1.41 (1.23,1.61) | 1.0×10 <sup>-6</sup> |                    |
|                  | 4                               | 529/695               | 1.32 (1.15,1.52) | 9.4×10 <sup>-5</sup> |                    |
|                  | 5                               | 540/722               | 1.28 (1.11,1.49) | 7.6×10 <sup>-4</sup> |                    |
| ACPA-positive RA | 0*                              | 714/2114              | 1.00 ref.        |                      |                    |
|                  | 1                               | 310/789               | 1.06 (0.90,1.25) | 0.49                 | <b>&lt;0.001</b>   |
|                  | 2                               | 344/769               | 1.19 (1.02,1.40) | 0.028                |                    |
|                  | 3                               | 375/704               | 1.43 (1.22,1.67) | 7.0×10 <sup>-6</sup> |                    |
|                  | 4                               | 370/695               | 1.46 (1.24,1.71) | 3.3×10 <sup>-6</sup> |                    |
|                  | 5                               | 332/722               | 1.32 (1.11,1.57) | 1.4×10 <sup>-3</sup> |                    |
| ACPA-negative RA | 0*                              | 384/2114              | 1.00 ref.        |                      |                    |
|                  | 1                               | 166/789               | 1.17 (0.95,1.43) | 0.14                 | 0.016              |
|                  | 2                               | 173/769               | 1.19 (0.97,1.45) | 0.097                |                    |
|                  | 3                               | 192/704               | 1.38 (1.13,1.68) | 1.4×10 <sup>-3</sup> |                    |
|                  | 4                               | 159/695               | 1.11 (0.90,1.37) | 0.33                 |                    |
|                  | 5                               | 208/722               | 1.25 (1.02,1.54) | 0.032                |                    |

**Supplementary Table 5. The combined effects of occupational inhalable agents, smoking, and high genetic risk score with risk of RA.** Estimates were adjusted for age, sex, residential areas, body mass index, levels of education, alcohol drinking, and principal components 1-10. For the OR estimates that were not available due to the limited number of cases within the subgroup, 'not applicable' was marked in corresponding cells.

| Occupational exposure                 | Smoking | GRS | Overall RA         |                   |                       | ACPA-positive subtype |                     |                       | ACPA-negative subtype |                  |       |
|---------------------------------------|---------|-----|--------------------|-------------------|-----------------------|-----------------------|---------------------|-----------------------|-----------------------|------------------|-------|
|                                       |         |     | N (case / control) | OR (95%CI)        | P                     | N (case / control)    | OR (95%CI)          | P                     | N (case / control)    | OR (95%CI)       | P     |
| <b>The sixteen independent agents</b> |         |     |                    |                   |                       |                       |                     |                       |                       |                  |       |
| <b>Asbestos</b>                       |         |     |                    |                   |                       |                       |                     |                       |                       |                  |       |
| -                                     | -       | -   | 101/232            | 1.00 ref          |                       | 25/232                | 1.00 ref            |                       | 76/232                | 1.00 ref         |       |
| +                                     | -       | -   | 2/6                | 0.94 (0.18,4.85)  | 0.94                  | 1/6                   | 2.51 (0.28,22.42)   | 0.41                  | 1/6                   | 0.45 (0.05,3.91) | 0.47  |
| -                                     | +       | -   | 139/228            | 1.44 (1.04,2)     | 0.028                 | 60/228                | 2.82 (1.66,4.79)    | 1.2×10 <sup>-4</sup>  | 79/228                | 1.01 (0.69,1.48) | 0.95  |
| -                                     | -       | +   | 263/182            | 3.19 (2.34,4.35)  | 2.5×10 <sup>-13</sup> | 193/182               | 10.19 (6.3,16.47)   | 2.7×10 <sup>-21</sup> | 70/182                | 1.10 (0.74,1.63) | 0.63  |
| +                                     | +       | -   | 22/27              | 1.86 (0.96,3.61)  | 0.066                 | 10/27                 | 4.98 (2.02,12.31)   | 5.0×10 <sup>-4</sup>  | 12/27                 | 0.98 (0.44,2.19) | 0.97  |
| -                                     | +       | +   | 435/236            | 4.36 (3.25,5.85)  | 1.0×10 <sup>-22</sup> | 338/236               | 15.76 (9.84,25.25)  | 1.9×10 <sup>-30</sup> | 97/236                | 1.19 (0.83,1.72) | 0.35  |
| +                                     | -       | +   | 23/11              | 4.99 (2.22,11.17) | 9.5×10 <sup>-5</sup>  | 14/11                 | 17.40 (6.6,45.88)   | 7.7×10 <sup>-9</sup>  | 9/11                  | 1.85 (0.7,4.89)  | 0.21  |
| +                                     | +       | +   | 68/18              | 9.10 (4.91,16.86) | 2.3×10 <sup>-12</sup> | 49/18                 | 35.24 (16.48,75.35) | 4.0×10 <sup>-20</sup> | 19/18                 | 2.64 (1.24,5.61) | 0.012 |
| <b>Cadmium</b>                        |         |     |                    |                   |                       |                       |                     |                       |                       |                  |       |
| -                                     | -       | -   | 101/232            | 1.00 ref          |                       | 25/232                | 1.00 ref            |                       | 76/232                | 1.00 ref         |       |
| +                                     | -       | -   | 1/3                | 0.56 (0.06,5.61)  | 0.62                  | 1/3                   | 2.34 (0.23,24.17)   | 0.48                  | 0/3                   | Not applicable   | NA    |
| -                                     | +       | -   | 139/228            | 1.44 (1.04,2)     | 0.029                 | 60/228                | 2.81 (1.65,4.78)    | 1.3×10 <sup>-4</sup>  | 79/228                | 1.02 (0.7,1.5)   | 0.90  |
| -                                     | -       | +   | 263/182            | 3.21 (2.35,4.39)  | 2.3×10 <sup>-13</sup> | 193/182               | 10.25 (6.33,16.61)  | 3.3×10 <sup>-21</sup> | 70/182                | 1.10 (0.74,1.64) | 0.63  |
| +                                     | +       | -   | 2/6                | 0.73 (0.14,3.83)  | 0.71                  | 2/6                   | 3.56 (0.66,19.27)   | 0.14                  | 0/6                   | Not applicable   | NA    |
| -                                     | +       | +   | 435/236            | 4.41 (3.28,5.93)  | 7.4×10 <sup>-23</sup> | 338/236               | 16.00 (9.96,25.71)  | 2.1×10 <sup>-30</sup> | 97/236                | 1.22 (0.84,1.77) | 0.29  |
| +                                     | -       | +   | 5/4                | 2.38 (0.59,9.64)  | 0.22                  | 3/4                   | 7.13 (1.4,36.29)    | 0.018                 | 2/4                   | 1.01 (0.16,6.22) | 0.99  |
| +                                     | +       | +   | 19/4               | 8.44 (2.67,26.69) | 2.8×10 <sup>-4</sup>  | 14/4                  | 31.32 (8.92,110.02) | 7.7×10 <sup>-8</sup>  | 5/4                   | 2.49 (0.57,10.9) | 0.22  |
| <b>Carbon monoxide</b>                |         |     |                    |                   |                       |                       |                     |                       |                       |                  |       |
| -                                     | -       | -   | 101/232            | 1.00 ref          |                       | 25/232                | 1.00 ref            |                       | 76/232                | 1.00 ref         |       |
| +                                     | -       | -   | 24/50              | 1.02 (0.58,1.79)  | 0.96                  | 9/50                  | 1.86 (0.79,4.38)    | 0.15                  | 15/50                 | 0.83 (0.42,1.61) | 0.57  |
| -                                     | +       | -   | 139/228            | 1.45 (1.05,2.02)  | 0.025                 | 60/228                | 2.78 (1.64,4.7)     | 1.4×10 <sup>-4</sup>  | 79/228                | 1.05 (0.72,1.53) | 0.79  |
| -                                     | -       | +   | 263/182            | 3.23 (2.37,4.41)  | 1.3×10 <sup>-13</sup> | 193/182               | 10.30 (6.39,16.61)  | 1.2×10 <sup>-21</sup> | 70/182                | 1.14 (0.77,1.69) | 0.51  |
| +                                     | +       | -   | 85/97              | 1.84 (1.22,2.77)  | 3.8×10 <sup>-3</sup>  | 37/97                 | 3.59 (1.94,6.63)    | 4.6×10 <sup>-5</sup>  | 48/97                 | 1.33 (0.82,2.17) | 0.24  |
| -                                     | +       | +   | 435/236            | 4.47 (3.33,6)     | 1.5×10 <sup>-23</sup> | 338/236               | 15.82 (9.91,25.26)  | 5.7×10 <sup>-31</sup> | 97/236                | 1.28 (0.89,1.84) | 0.19  |

|                         |   |   |   |         |                    |                       |         |                      |                       |         |                   |                      |
|-------------------------|---|---|---|---------|--------------------|-----------------------|---------|----------------------|-----------------------|---------|-------------------|----------------------|
|                         | + | - | + | 85/42   | 4.12 (2.56,6.62)   | $4.9 \times 10^{-9}$  | 57/42   | 12.72 (6.82,23.73)   | $1.3 \times 10^{-15}$ | 28/42   | 1.60 (0.88,2.91)  | 0.13                 |
|                         | + | + | + | 305/106 | 6.36 (4.43,9.12)   | $8.9 \times 10^{-24}$ | 238/106 | 23.48 (13.91,39.64)  | $3.4 \times 10^{-32}$ | 67/106  | 1.65 (1.06,2.59)  | 0.028                |
| Detergents              |   |   |   |         |                    |                       |         |                      |                       |         |                   |                      |
|                         | - | - | - | 101/232 | 1.00 ref           |                       | 25/232  | 1.00 ref             |                       | 76/232  | 1.00 ref          |                      |
|                         | + | - | - | 119/271 | 1.00 (0.72,1.38)   | 0.98                  | 41/271  | 1.47 (0.86,2.52)     | 0.16                  | 78/271  | 0.84 (0.58,1.22)  | 0.37                 |
|                         | - | + | - | 139/228 | 1.45 (1.05,2)      | 0.025                 | 60/228  | 2.58 (1.54,4.32)     | $3.1 \times 10^{-4}$  | 79/228  | 1.07 (0.73,1.55)  | 0.73                 |
|                         | - | - | + | 263/182 | 3.25 (2.39,4.42)   | $6.8 \times 10^{-14}$ | 193/182 | 9.83 (6.14,15.72)    | $1.5 \times 10^{-21}$ | 70/182  | 1.17 (0.79,1.72)  | 0.44                 |
|                         | + | + | - | 280/355 | 1.79 (1.34,2.39)   | $8.6 \times 10^{-5}$  | 123/355 | 3.37 (2.1,5.41)      | $4.4 \times 10^{-7}$  | 157/355 | 1.29 (0.93,1.8)   | 0.13                 |
|                         | - | + | + | 435/236 | 4.41 (3.30,5.89)   | $1.2 \times 10^{-23}$ | 338/236 | 14.48 (9.18,22.84)   | $1.4 \times 10^{-30}$ | 97/236  | 1.30 (0.91,1.87)  | 0.15                 |
|                         | + | - | + | 332/272 | 2.65 (1.98,3.55)   | $6.5 \times 10^{-11}$ | 232/272 | 7.57 (4.79,11.97)    | $4.8 \times 10^{-18}$ | 100/272 | 1.05 (0.73,1.5)   | 0.79                 |
|                         | + | + | + | 940/383 | 5.67 (4.32,7.43)   | $4.3 \times 10^{-36}$ | 719/383 | 18.41 (11.83,28.65)  | $3.7 \times 10^{-38}$ | 221/383 | 1.76 (1.28,2.43)  | $4.8 \times 10^{-4}$ |
| Flour dust              |   |   |   |         |                    |                       |         |                      |                       |         |                   |                      |
|                         | - | - | - | 101/232 | 1.00 ref           |                       | 25/232  | 1.00 ref             |                       | 76/232  | 1.00 ref          |                      |
|                         | + | - | - | 4/3     | 4.00 (0.84,19.01)  | 0.082                 | 1/3     | 5.67 (0.55,58.64)    | 0.15                  | 3/3     | 3.66 (0.66,20.26) | 0.14                 |
|                         | - | + | - | 139/228 | 1.45 (1.05,2.02)   | 0.025                 | 60/228  | 2.83 (1.67,4.81)     | $1.2 \times 10^{-4}$  | 79/228  | 1.04 (0.71,1.52)  | 0.83                 |
|                         | - | - | + | 263/182 | 3.18 (2.33,4.34)   | $3.6 \times 10^{-13}$ | 193/182 | 10.15 (6.27,16.43)   | $4.2 \times 10^{-21}$ | 70/182  | 1.09 (0.74,1.63)  | 0.65                 |
|                         | + | + | - | 3/6     | 0.98 (0.23,4.12)   | 0.98                  | 2/6     | 2.90 (0.53,15.96)    | 0.22                  | 1/6     | 0.36 (0.04,3.28)  | 0.37                 |
|                         | - | + | + | 435/236 | 4.41 (3.28,5.92)   | $7.2 \times 10^{-23}$ | 338/236 | 15.93 (9.92,25.57)   | $2.0 \times 10^{-30}$ | 97/236  | 1.24 (0.86,1.79)  | 0.25                 |
|                         | + | - | + | 10/9    | 2.32 (0.87,6.15)   | 0.091                 | 6/9     | 8.00 (2.45,26.09)    | $5.7 \times 10^{-4}$  | 4/9     | 0.75 (0.21,2.67)  | 0.65                 |
|                         | + | + | + | 16/6    | 5.77 (2.08,15.98)  | $7.4 \times 10^{-4}$  | 11/6    | 20.88 (6.41,68)      | $4.5 \times 10^{-7}$  | 5/6     | 1.99 (0.53,7.48)  | 0.31                 |
| Fungicides              |   |   |   |         |                    |                       |         |                      |                       |         |                   |                      |
|                         | - | - | - | 101/232 | 1.00 ref           |                       | 25/232  | 1.00 ref             |                       | 76/232  | 1.00 ref          |                      |
|                         | + | - | - | 3/4     | 1.55 (0.31,7.68)   | 0.59                  | 0/4     | Not applicable       | NA                    | 3/4     | 1.83 (0.35,9.46)  | 0.47                 |
|                         | - | + | - | 139/228 | 1.44 (1.04,2)      | 0.029                 | 60/228  | 2.82 (1.66,4.78)     | $1.3 \times 10^{-4}$  | 79/228  | 1.03 (0.7,1.5)    | 0.89                 |
|                         | - | - | + | 263/182 | 3.19 (2.33,4.35)   | $3.3 \times 10^{-13}$ | 193/182 | 10.06 (6.22,16.27)   | $4.8 \times 10^{-21}$ | 70/182  | 1.11 (0.74,1.64)  | 0.62                 |
|                         | + | + | - | 7/7     | 2.41 (0.78,7.44)   | 0.13                  | 2/7     | 3.86 (0.73,20.48)    | 0.11                  | 5/7     | 2.31 (0.65,8.2)   | 0.20                 |
|                         | - | + | + | 435/236 | 4.38 (3.26,5.88)   | $1.2 \times 10^{-22}$ | 338/236 | 15.75 (9.82,25.27)   | $2.7 \times 10^{-30}$ | 97/236  | 1.22 (0.84,1.76)  | 0.30                 |
|                         | + | - | + | 10/6    | 3.35 (1.11,10.06)  | 0.031                 | 8/6     | 12.05 (3.57,40.65)   | $6.0 \times 10^{-5}$  | 2/6     | 0.81 (0.15,4.4)   | 0.81                 |
|                         | + | + | + | 25/3    | 18.77 (5.40,65.24) | $3.9 \times 10^{-6}$  | 19/3    | 68.16 (17.93,259.08) | $5.8 \times 10^{-10}$ | 6/3     | 5.68 (1.31,24.64) | 0.020                |
| Gasoline engine exhaust |   |   |   |         |                    |                       |         |                      |                       |         |                   |                      |
|                         | - | - | - | 101/232 | 1.00 ref           |                       | 25/232  | 1.00 ref             |                       | 76/232  | 1.00 ref          |                      |
|                         | + | - | - | 5/14    | 0.83 (0.27,2.5)    | 0.74                  | 1/14    | 0.77 (0.09,6.57)     | 0.81                  | 4/14    | 0.74 (0.22,2.51)  | 0.62                 |
|                         | - | + | - | 139/228 | 1.43 (1.03,1.98)   | 0.034                 | 60/228  | 2.75 (1.62,4.66)     | $1.7 \times 10^{-4}$  | 79/228  | 1.01 (0.69,1.48)  | 0.95                 |
|                         | - | - | + | 263/182 | 3.15 (2.31,4.3)    | $5.1 \times 10^{-13}$ | 193/182 | 9.94 (6.15,16.07)    | $6.4 \times 10^{-21}$ | 70/182  | 1.09 (0.74,1.62)  | 0.66                 |



|                    |   |   |   |         |                    |                       |         |                     |                       |        |                  |      |
|--------------------|---|---|---|---------|--------------------|-----------------------|---------|---------------------|-----------------------|--------|------------------|------|
|                    | + | + | - | 23/17   | 2.94 (1.44,6)      | $3.0 \times 10^{-3}$  | 10/17   | 7.81 (3.02,20.23)   | $2.3 \times 10^{-5}$  | 13/17  | 1.74 (0.76,3.96) | 0.19 |
|                    | - | + | + | 435/236 | 4.33 (3.23,5.82)   | $1.9 \times 10^{-22}$ | 338/236 | 15.55 (9.71,24.89)  | $3.2 \times 10^{-30}$ | 97/236 | 1.20 (0.83,1.74) | 0.32 |
|                    | + | - | + | 14/6    | 5.15 (1.85,14.35)  | $1.7 \times 10^{-3}$  | 9/6     | 16.33 (5.07,52.57)  | $2.9 \times 10^{-6}$  | 5/6    | 1.99 (0.53,7.47) | 0.31 |
| Lead               | + | + | + | 65/15   | 10.15 (5.21,19.76) | $9.7 \times 10^{-12}$ | 51/15   | 45.13 (20.52,99.23) | $2.7 \times 10^{-21}$ | 14/15  | 2.00 (0.83,4.83) | 0.12 |
|                    | - | - | - | 101/232 | 1.00 ref           |                       | 25/232  | 1.00 ref            |                       | 76/232 | 1.00 ref         |      |
|                    | + | - | - | 8/11    | 1.70 (0.65,4.45)   | 0.28                  | 5/11    | 5.03 (1.56,16.24)   | $6.9 \times 10^{-3}$  | 3/11   | 0.73 (0.19,2.79) | 0.64 |
|                    | - | + | - | 139/228 | 1.42 (1.02,1.97)   | 0.035                 | 60/228  | 2.75 (1.63,4.67)    | $1.7 \times 10^{-4}$  | 79/228 | 1.00 (0.68,1.46) | 10   |
|                    | - | - | + | 263/182 | 3.19 (2.34,4.36)   | $2.6 \times 10^{-13}$ | 193/182 | 10.05 (6.22,16.24)  | $4.0 \times 10^{-21}$ | 70/182 | 1.11 (0.75,1.64) | 0.61 |
|                    | + | + | - | 21/35   | 1.36 (0.73,2.54)   | 0.33                  | 11/35   | 3.16 (1.36,7.35)    | $7.3 \times 10^{-3}$  | 10/35  | 0.83 (0.37,1.85) | 0.65 |
|                    | - | + | + | 435/236 | 4.34 (3.23,5.82)   | $1.4 \times 10^{-22}$ | 338/236 | 15.54 (9.71,24.87)  | $2.6 \times 10^{-30}$ | 97/236 | 1.19 (0.82,1.72) | 0.35 |
|                    | + | - | + | 28/12   | 5.29 (2.51,11.13)  | $1.2 \times 10^{-5}$  | 20/12   | 19.63 (8.18,47.12)  | $2.7 \times 10^{-11}$ | 8/12   | 1.70 (0.64,4.54) | 0.29 |
| Oil mist           | + | + | + | 63/33   | 4.38 (2.62,7.31)   | $1.7 \times 10^{-8}$  | 51/33   | 18.33 (9.52,35.29)  | $3.2 \times 10^{-18}$ | 12/33  | 0.85 (0.4,1.81)  | 0.67 |
|                    | - | - | - | 101/232 | 1.00 ref           |                       | 25/232  | 1.00 ref            |                       | 76/232 | 1.00 ref         |      |
|                    | + | - | - | 3/11    | 0.55 (0.14,2.16)   | 0.39                  | 0/11    | Not applicable      | NA                    | 3/11   | 0.61 (0.15,2.41) | 0.48 |
|                    | - | + | - | 139/228 | 1.44 (1.04,2)      | 0.028                 | 60/228  | 2.76 (1.63,4.66)    | $1.5 \times 10^{-4}$  | 79/228 | 1.03 (0.71,1.51) | 0.87 |
|                    | - | - | + | 263/182 | 3.16 (2.32,4.32)   | $3.8 \times 10^{-13}$ | 193/182 | 9.88 (6.14,15.92)   | $4.4 \times 10^{-21}$ | 70/182 | 1.11 (0.75,1.65) | 0.60 |
|                    | + | + | - | 19/27   | 1.77 (0.90,3.47)   | 0.10                  | 10/27   | 4.63 (1.9,11.28)    | $7.6 \times 10^{-4}$  | 9/27   | 1.02 (0.42,2.45) | 0.97 |
|                    | - | + | + | 435/236 | 4.33 (3.23,5.81)   | $1.6 \times 10^{-22}$ | 338/236 | 15.29 (9.58,24.4)   | $2.8 \times 10^{-30}$ | 97/236 | 1.21 (0.84,1.75) | 0.31 |
|                    | + | - | + | 15/19   | 1.56 (0.73,3.33)   | 0.25                  | 11/19   | 5.79 (2.32,14.44)   | $1.7 \times 10^{-4}$  | 4/19   | 0.39 (0.12,1.26) | 0.12 |
|                    | + | + | + | 74/23   | 7.06 (4.00,12.45)  | $1.5 \times 10^{-11}$ | 57/23   | 28.37 (14.01,57.47) | $1.5 \times 10^{-20}$ | 17/23  | 1.60 (0.76,3.36) | 0.22 |
| Pulp or paper dust |   |   |   |         |                    |                       |         |                     |                       |        |                  |      |
|                    | - | - | - | 101/232 | 1.00 ref           |                       | 25/232  | 1.00 ref            |                       | 76/232 | 1.00 ref         |      |
|                    | + | - | - | 13/34   | 0.77 (0.38,1.56)   | 0.46                  | 5/34    | 1.24 (0.41,3.7)     | 0.70                  | 8/34   | 0.58 (0.25,1.34) | 0.20 |
|                    | - | + | - | 139/228 | 1.47 (1.06,2.03)   | 0.022                 | 60/228  | 2.93 (1.72,4.98)    | $7.3 \times 10^{-5}$  | 79/228 | 1.03 (0.71,1.5)  | 0.88 |
|                    | - | - | + | 263/182 | 3.21 (2.35,4.39)   | $2.1 \times 10^{-13}$ | 193/182 | 10.41 (6.42,16.89)  | $2.1 \times 10^{-21}$ | 70/182 | 1.13 (0.77,1.68) | 0.53 |
|                    | + | + | - | 32/33   | 2.26 (1.28,3.96)   | $4.6 \times 10^{-3}$  | 18/33   | 5.92 (2.79,12.54)   | $3.5 \times 10^{-6}$  | 14/33  | 1.42 (0.69,2.9)  | 0.34 |
|                    | - | + | + | 435/236 | 4.43 (3.30,5.95)   | $4.4 \times 10^{-23}$ | 338/236 | 16.32 (10.16,26.21) | $7.4 \times 10^{-31}$ | 97/236 | 1.24 (0.86,1.79) | 0.25 |
|                    | + | - | + | 46/26   | 3.72 (2.13,6.48)   | $3.7 \times 10^{-6}$  | 33/26   | 12.30 (6.11,24.74)  | $1.9 \times 10^{-12}$ | 13/26  | 1.26 (0.6,2.65)  | 0.55 |
|                    | + | + | + | 115/53  | 4.72 (3.10,7.21)   | $6.2 \times 10^{-13}$ | 93/53   | 18.36 (10.37,32.51) | $1.8 \times 10^{-23}$ | 22/53  | 1.06 (0.59,1.92) | 0.85 |
| Quartz dust        |   |   |   |         |                    |                       |         |                     |                       |        |                  |      |
|                    | - | - | - | 101/232 | 1.00 ref           |                       | 25/232  | 1.00 ref            |                       | 76/232 | 1.00 ref         |      |
|                    | + | - | - | 10/14   | 1.68 (0.69,4.1)    | 0.25                  | 3/14    | 2.52 (0.64,9.93)    | 0.19                  | 7/14   | 1.34 (0.48,3.72) | 0.57 |

|               |   |   |   |         |                   |                       |         |                     |                       |        |                  |       |
|---------------|---|---|---|---------|-------------------|-----------------------|---------|---------------------|-----------------------|--------|------------------|-------|
|               | - | + | - | 139/228 | 1.43 (1.03,1.98)  | 0.033                 | 60/228  | 2.76 (1.63,4.67)    | 1.5×10 <sup>-4</sup>  | 79/228 | 1.01 (0.69,1.48) | 0.95  |
|               | - | - | + | 263/182 | 3.20 (2.34,4.36)  | 2.2×10 <sup>-13</sup> | 193/182 | 9.91 (6.15,15.96)   | 4.3×10 <sup>-21</sup> | 70/182 | 1.12 (0.76,1.66) | 0.56  |
|               | + | + | - | 38/35   | 2.34 (1.31,4.15)  | 3.9×10 <sup>-3</sup>  | 16/35   | 5.14 (2.31,11.44)   | 6.2×10 <sup>-5</sup>  | 22/35  | 1.53 (0.77,3.01) | 0.22  |
|               | - | + | + | 435/236 | 4.36 (3.25,5.84)  | 9.1×10 <sup>-23</sup> | 338/236 | 15.33 (9.6,24.46)   | 2.6×10 <sup>-30</sup> | 97/236 | 1.21 (0.84,1.75) | 0.31  |
|               | + | - | + | 34/18   | 4.25 (2.19,8.26)  | 2.0×10 <sup>-5</sup>  | 20/18   | 13.04 (5.7,29.85)   | 1.2×10 <sup>-9</sup>  | 14/18  | 1.78 (0.79,3.99) | 0.16  |
|               | + | + | + | 127/37  | 8.12 (4.97,13.26) | 5.5×10 <sup>-17</sup> | 94/37   | 31.60 (16.64,59.99) | 4.7×10 <sup>-26</sup> | 33/37  | 2.16 (1.17,3.99) | 0.014 |
| Softwood dust |   |   |   |         |                   |                       |         |                     |                       |        |                  |       |
|               | - | - | - | 101/232 | 1.00 ref          |                       | 25/232  | 1.00 ref            |                       | 76/232 | 1.00 ref         |       |
|               | + | - | - | 10/19   | 1.41 (0.60,3.29)  | 0.43                  | 1/19    | 0.72 (0.09,5.97)    | 0.76                  | 9/19   | 1.43 (0.57,3.55) | 0.45  |
|               | - | + | - | 139/228 | 1.46 (1.05,2.03)  | 0.024                 | 60/228  | 2.83 (1.67,4.81)    | 1.1×10 <sup>-4</sup>  | 79/228 | 1.05 (0.72,1.53) | 0.81  |
|               | - | - | + | 263/182 | 3.22 (2.36,4.4)   | 1.8×10 <sup>-13</sup> | 193/182 | 10.12 (6.25,16.36)  | 4.0×10 <sup>-21</sup> | 70/182 | 1.14 (0.77,1.69) | 0.51  |
|               | + | + | - | 22/30   | 1.63 (0.86,3.1)   | 0.14                  | 9/30    | 3.31 (1.32,8.28)    | 0.010                 | 13/30  | 1.11 (0.51,2.41) | 0.80  |
|               | - | + | + | 435/236 | 4.46 (3.32,5.99)  | 3.1×10 <sup>-23</sup> | 338/236 | 15.85 (9.88,25.41)  | 1.8×10 <sup>-30</sup> | 97/236 | 1.25 (0.86,1.8)  | 0.24  |
|               | + | - | + | 27/17   | 3.53 (1.77,7.05)  | 3.5×10 <sup>-4</sup>  | 17/17   | 11.60 (4.93,27.28)  | 1.9×10 <sup>-8</sup>  | 10/17  | 1.34 (0.55,3.23) | 0.52  |
|               | + | + | + | 83/31   | 6.43 (3.81,10.83) | 2.9×10 <sup>-12</sup> | 58/31   | 25.72 (13.08,50.58) | 4.8×10 <sup>-21</sup> | 25/31  | 1.87 (0.97,3.61) | 0.060 |
| Textile dust  |   |   |   |         |                   |                       |         |                     |                       |        |                  |       |
|               | - | - | - | 101/232 | 1.00 ref          |                       | 25/232  | 1.00 ref            |                       | 76/232 | 1.00 ref         |       |
|               | + | - | - | 8/19    | 0.78 (0.32,1.92)  | 0.59                  | 2/19    | 0.96 (0.2,4.56)     | 0.96                  | 6/19   | 0.74 (0.27,2.04) | 0.55  |
|               | - | + | - | 139/228 | 1.45 (1.05,2.02)  | 0.026                 | 60/228  | 2.82 (1.66,4.79)    | 1.3×10 <sup>-4</sup>  | 79/228 | 1.05 (0.72,1.53) | 0.82  |
|               | - | - | + | 263/182 | 3.19 (2.33,4.36)  | 3.5×10 <sup>-13</sup> | 193/182 | 10.20 (6.3,16.52)   | 3.7×10 <sup>-21</sup> | 70/182 | 1.10 (0.74,1.64) | 0.63  |
|               | + | + | - | 20/30   | 1.40 (0.73,2.68)  | 0.32                  | 12/30   | 3.89 (1.68,9)       | 1.5×10 <sup>-3</sup>  | 8/30   | 0.65 (0.27,1.57) | 0.34  |
|               | - | + | + | 435/236 | 4.45 (3.31,5.98)  | 4.3×10 <sup>-23</sup> | 338/236 | 16.08 (10.02,25.81) | 1.2×10 <sup>-30</sup> | 97/236 | 1.25 (0.86,1.81) | 0.24  |
|               | + | - | + | 17/10   | 2.67 (1.11,6.43)  | 0.029                 | 10/10   | 7.34 (2.47,21.75)   | 3.3×10 <sup>-4</sup>  | 7/10   | 1.44 (0.48,4.3)  | 0.52  |
|               | + | + | + | 55/26   | 4.59 (2.62,8.04)  | 1.0×10 <sup>-7</sup>  | 42/26   | 17.96 (8.91,36.17)  | 6.3×10 <sup>-16</sup> | 13/26  | 1.21 (0.56,2.63) | 0.63  |
| Toluene       |   |   |   |         |                   |                       |         |                     |                       |        |                  |       |
|               | - | - | - | 101/232 | 1.00 ref          |                       | 25/232  | 1.00 ref            |                       | 76/232 | 1.00 ref         |       |
|               | + | - | - | 1/2     | 1.06 (0.09,13)    | 0.96                  | 1/2     | 6.05 (0.48,75.71)   | 0.16                  | 0/2    | Not applicable   | NA    |
|               | - | + | - | 139/228 | 1.46 (1.05,2.03)  | 0.024                 | 60/228  | 2.90 (1.7,4.93)     | 8.9×10 <sup>-5</sup>  | 79/228 | 1.03 (0.71,1.51) | 0.87  |
|               | - | - | + | 263/182 | 3.20 (2.34,4.38)  | 2.8×10 <sup>-13</sup> | 193/182 | 10.23 (6.31,16.58)  | 3.8×10 <sup>-21</sup> | 70/182 | 1.10 (0.74,1.64) | 0.63  |
|               | + | + | - | 10/8    | 2.10 (0.76,5.78)  | 0.15                  | 4/8     | 4.74 (1.21,18.66)   | 0.026                 | 6/8    | 1.31 (0.41,4.2)  | 0.66  |
|               | - | + | + | 435/236 | 4.44 (3.31,5.98)  | 5.5×10 <sup>-23</sup> | 338/236 | 16.21 (10.08,26.07) | 1.4×10 <sup>-30</sup> | 97/236 | 1.22 (0.85,1.77) | 0.28  |
|               | + | - | + | 14/6    | 4.99 (1.78,13.98) | 2.3×10 <sup>-3</sup>  | 11/6    | 18.93 (6.05,59.26)  | 4.4×10 <sup>-7</sup>  | 3/6    | 1.35 (0.29,6.21) | 0.70  |
|               | + | + | + | 28/9    | 6.99 (3.04,16.07) | 4.6×10 <sup>-6</sup>  | 21/9    | 29.65 (11.41,77.06) | 3.5×10 <sup>-12</sup> | 7/9    | 1.92 (0.64,5.71) | 0.24  |
| Welding fume  |   |   |   |         |                   |                       |         |                     |                       |        |                  |       |

|                                                                               |   |   |         |                   |                       |         |                     |                       |        |                   |       |
|-------------------------------------------------------------------------------|---|---|---------|-------------------|-----------------------|---------|---------------------|-----------------------|--------|-------------------|-------|
| -                                                                             | - | - | 101/232 | 1.00 ref          |                       | 25/232  | 1.00 ref            |                       | 76/232 | 1.00 ref          |       |
| +                                                                             | - | - | 2/6     | 0.79 (0.15,4.09)  | 0.78                  | 0/6     | Not applicable      | NA                    | 2/6    | 0.97 (0.18,5.24)  | 0.97  |
| -                                                                             | + | - | 139/228 | 1.48 (1.06,2.05)  | 0.020                 | 60/228  | 2.94 (1.73,5.01)    | $7.1 \times 10^{-5}$  | 79/228 | 1.05 (0.72,1.53)  | 0.82  |
| -                                                                             | - | + | 263/182 | 3.23 (2.37,4.42)  | $1.7 \times 10^{-13}$ | 193/182 | 10.43 (6.42,16.93)  | $2.4 \times 10^{-21}$ | 70/182 | 1.13 (0.76,1.67)  | 0.56  |
| +                                                                             | + | - | 11/20   | 1.26 (0.55,2.86)  | 0.58                  | 3/20    | 2.15 (0.56,8.2)     | 0.26                  | 8/20   | 0.91 (0.36,2.34)  | 0.85  |
| -                                                                             | + | + | 435/236 | 4.47 (3.32,6)     | $3.3 \times 10^{-23}$ | 338/236 | 16.40 (10.19,26.4)  | $1.1 \times 10^{-30}$ | 97/236 | 1.25 (0.86,1.8)   | 0.24  |
| +                                                                             | - | + | 19/6    | 8.26 (3.04,22.48) | $3.6 \times 10^{-5}$  | 11/6    | 23.27 (7.31,74.06)  | $1.0 \times 10^{-7}$  | 8/6    | 4.03 (1.23,13.21) | 0.021 |
| +                                                                             | + | + | 65/22   | 7.21 (3.97,13.07) | $8.0 \times 10^{-11}$ | 51/22   | 31.75 (15.13,66.63) | $6.1 \times 10^{-20}$ | 14/22  | 1.55 (0.69,3.47)  | 0.28  |
| <b>Volatile sulphur compounds</b>                                             |   |   |         |                   |                       |         |                     |                       |        |                   |       |
| -                                                                             | - | - | 101/232 | 1.00 ref          |                       | 25/232  | 1.00 ref            |                       | 76/232 | 1.00 ref          |       |
| +                                                                             | - | - | 12/29   | 0.88 (0.42,1.87)  | 0.75                  | 3/29    | 1.10 (0.3,4.06)     | 0.89                  | 9/29   | 0.79 (0.34,1.85)  | 0.59  |
| -                                                                             | + | - | 139/228 | 1.43 (1.03,1.98)  | 0.033                 | 60/228  | 2.74 (1.62,4.63)    | $1.7 \times 10^{-4}$  | 79/228 | 1.02 (0.7,1.49)   | 0.92  |
| -                                                                             | - | + | 263/182 | 3.20 (2.34,4.36)  | $2.5 \times 10^{-13}$ | 193/182 | 10.09 (6.26,16.27)  | $2.5 \times 10^{-21}$ | 70/182 | 1.10 (0.74,1.64)  | 0.62  |
| +                                                                             | + | - | 24/27   | 1.72 (0.90,3.27)  | 0.10                  | 10/27   | 3.19 (1.29,7.9)     | 0.012                 | 14/27  | 1.23 (0.57,2.64)  | 0.60  |
| -                                                                             | + | + | 435/236 | 4.35 (3.25,5.84)  | $1.1 \times 10^{-22}$ | 338/236 | 15.42 (9.66,24.62)  | $2.2 \times 10^{-30}$ | 97/236 | 1.21 (0.83,1.74)  | 0.32  |
| +                                                                             | - | + | 23/23   | 1.92 (0.98,3.76)  | 0.056                 | 10/23   | 3.40 (1.35,8.56)    | $9.5 \times 10^{-3}$  | 13/23  | 1.31 (0.59,2.87)  | 0.51  |
| +                                                                             | + | + | 82/23   | 8.09 (4.64,14.11) | $1.6 \times 10^{-13}$ | 67/23   | 34.33 (17.32,68.07) | $4.2 \times 10^{-24}$ | 15/23  | 1.39 (0.64,3.01)  | 0.40  |
| <b>Other agents in correlation with any of the sixteen independent agents</b> |   |   |         |                   |                       |         |                     |                       |        |                   |       |
| <b>Aliphatic and alicyclic hydrocarbon solvents</b>                           |   |   |         |                   |                       |         |                     |                       |        |                   |       |
| -                                                                             | - | - | 101/232 | 1.00 ref          |                       | 25/232  | 1.00 ref            |                       | 76/232 | 1.00 ref          |       |
| +                                                                             | - | - | 0/6     | Not applicable    | NA                    | 0/6     | Not applicable      | NA                    | 0/6    | Not applicable    | NA    |
| -                                                                             | + | - | 139/228 | 1.46 (1.05,2.03)  | 0.025                 | 60/228  | 2.89 (1.7,4.92)     | $9.3 \times 10^{-5}$  | 79/228 | 1.03 (0.71,1.51)  | 0.86  |
| -                                                                             | - | + | 263/182 | 3.19 (2.34,4.36)  | $3.2 \times 10^{-13}$ | 193/182 | 10.26 (6.32,16.64)  | $4.1 \times 10^{-21}$ | 70/182 | 1.11 (0.75,1.65)  | 0.60  |
| +                                                                             | + | - | 9/7     | 2.31 (0.80,6.71)  | 0.12                  | 4/7     | 4.71 (1.17,19.01)   | 0.029                 | 5/7    | 1.27 (0.36,4.46)  | 0.71  |
| -                                                                             | + | + | 435/236 | 4.41 (3.28,5.92)  | $8.2 \times 10^{-23}$ | 338/236 | 16.18 (10.05,26.03) | $1.9 \times 10^{-30}$ | 97/236 | 1.23 (0.85,1.77)  | 0.28  |
| +                                                                             | - | + | 14/7    | 4.26 (1.60,11.35) | $3.8 \times 10^{-3}$  | 9/7     | 12.37 (3.93,38.92)  | $1.7 \times 10^{-5}$  | 5/7    | 2.07 (0.59,7.28)  | 0.26  |
| +                                                                             | + | + | 29/11   | 5.60 (2.59,12.14) | $1.2 \times 10^{-5}$  | 21/11   | 22.77 (9.19,56.44)  | $1.5 \times 10^{-11}$ | 8/11   | 1.84 (0.67,5.08)  | 0.24  |
| <b>Animal dust</b>                                                            |   |   |         |                   |                       |         |                     |                       |        |                   |       |
| -                                                                             | - | - | 101/232 | 1.00 ref          |                       | 25/232  | 1.00 ref            |                       | 76/232 | 1.00 ref          |       |
| +                                                                             | - | - | 12/24   | 1.12 (0.52,2.42)  | 0.76                  | 4/24    | 1.81 (0.55,5.94)    | 0.33                  | 8/24   | 0.90 (0.37,2.19)  | 0.81  |
| -                                                                             | + | - | 139/228 | 1.43 (1.03,1.99)  | 0.031                 | 60/228  | 2.78 (1.64,4.72)    | $1.5 \times 10^{-4}$  | 79/228 | 1.02 (0.7,1.48)   | 0.94  |
| -                                                                             | - | + | 263/182 | 3.20 (2.35,4.37)  | $2.5 \times 10^{-13}$ | 193/182 | 10.16 (6.28,16.42)  | $3.1 \times 10^{-21}$ | 70/182 | 1.11 (0.74,1.64)  | 0.62  |
| +                                                                             | + | - | 18/24   | 1.59 (0.79,3.19)  | 0.20                  | 7/24    | 3.00 (1.1,8.17)     | 0.032                 | 11/24  | 1.12 (0.49,2.56)  | 0.79  |
| -                                                                             | + | + | 435/236 | 4.37 (3.26,5.87)  | $1.0 \times 10^{-22}$ | 338/236 | 15.65 (9.77,25.06)  | $2.3 \times 10^{-30}$ | 97/236 | 1.21 (0.84,1.75)  | 0.31  |
| +                                                                             | - | + | 19/22   | 1.84 (0.93,3.66)  | 0.080                 | 8/22    | 3.02 (1.15,7.91)    | 0.024                 | 11/22  | 1.27 (0.56,2.88)  | 0.56  |

|                               |   |   |   |         |                   |                       |         |                     |                       |        |                  |      |
|-------------------------------|---|---|---|---------|-------------------|-----------------------|---------|---------------------|-----------------------|--------|------------------|------|
|                               | + | + | + | 58/22   | 6.34 (3.56,11.27) | $3.2 \times 10^{-10}$ | 46/22   | 24.66 (12.19,49.91) | $5.1 \times 10^{-19}$ | 12/22  | 1.52 (0.67,3.44) | 0.31 |
| Aromatic hydrocarbon solvents |   |   |   |         |                   |                       |         |                     |                       |        |                  |      |
|                               | - | - | - | 101/232 | 1.00 ref          |                       | 25/232  | 1.00 ref            |                       | 76/232 | 1.00 ref         |      |
|                               | + | - | - | 1/4     | 0.64 (0.07,6.15)  | 0.70                  | 1/4     | 3.79 (0.38,37.52)   | 0.25                  | 0/4    | Not applicable   | NA   |
|                               | - | + | - | 139/228 | 1.46 (1.05,2.03)  | 0.024                 | 60/228  | 2.90 (1.7,4.94)     | $8.7 \times 10^{-5}$  | 79/228 | 1.03 (0.7,1.5)   | 0.89 |
|                               | - | - | + | 263/182 | 3.19 (2.34,4.36)  | $3.2 \times 10^{-13}$ | 193/182 | 10.25 (6.32,16.63)  | $3.8 \times 10^{-21}$ | 70/182 | 1.10 (0.74,1.63) | 0.63 |
|                               | + | + | - | 11/10   | 1.83 (0.72,4.67)  | 0.21                  | 4/10    | 3.68 (0.98,13.81)   | 0.053                 | 7/10   | 1.16 (0.39,3.39) | 0.79 |
|                               | - | + | + | 435/236 | 4.42 (3.29,5.95)  | $6.6 \times 10^{-23}$ | 338/236 | 16.24 (10.1,26.13)  | $1.4 \times 10^{-30}$ | 97/236 | 1.22 (0.84,1.76) | 0.30 |
|                               | + | - | + | 14/6    | 4.98 (1.78,13.94) | $2.2 \times 10^{-3}$  | 11/6    | 19.00 (6.08,59.41)  | $4.1 \times 10^{-7}$  | 3/6    | 1.34 (0.29,6.11) | 0.71 |
|                               | + | + | + | 33/11   | 6.40 (2.97,13.8)  | $2.2 \times 10^{-6}$  | 24/11   | 26.73 (10.86,65.78) | $8.5 \times 10^{-13}$ | 9/11   | 1.86 (0.69,5.02) | 0.22 |
| Benzo(a)pyrene                |   |   |   |         |                   |                       |         |                     |                       |        |                  |      |
|                               | - | - | - | 101/232 | 1.00 ref          |                       | 25/232  | 1.00 ref            |                       | 76/232 | 1.00 ref         |      |
|                               | + | - | - | 10/18   | 1.31 (0.56,3.04)  | 0.53                  | 5/18    | 3.64 (1.2,11.09)    | 0.023                 | 5/18   | 0.72 (0.25,2.11) | 0.55 |
|                               | - | + | - | 139/228 | 1.44 (1.04,2)     | 0.029                 | 60/228  | 2.73 (1.62,4.62)    | $1.8 \times 10^{-4}$  | 79/228 | 1.03 (0.71,1.5)  | 0.88 |
|                               | - | - | + | 263/182 | 3.21 (2.36,4.39)  | $1.8 \times 10^{-13}$ | 193/182 | 10.18 (6.31,16.42)  | $1.9 \times 10^{-21}$ | 70/182 | 1.13 (0.76,1.67) | 0.55 |
|                               | + | + | - | 47/55   | 1.96 (1.19,3.22)  | $8.4 \times 10^{-3}$  | 22/55   | 4.29 (2.12,8.69)    | $5.3 \times 10^{-5}$  | 25/55  | 1.27 (0.69,2.32) | 0.44 |
|                               | - | + | + | 435/236 | 4.40 (3.28,5.91)  | $5.2 \times 10^{-23}$ | 338/236 | 15.51 (9.72,24.77)  | $1.6 \times 10^{-30}$ | 97/236 | 1.25 (0.87,1.8)  | 0.23 |
|                               | + | - | + | 37/26   | 2.92 (1.60,5.32)  | $5.0 \times 10^{-4}$  | 27/26   | 10.48 (4.97,22.09)  | $6.8 \times 10^{-10}$ | 10/26  | 0.81 (0.35,1.88) | 0.62 |
|                               | + | + | + | 132/56  | 5.04 (3.25,7.82)  | $5.0 \times 10^{-13}$ | 104/56  | 19.56 (10.86,35.25) | $4.3 \times 10^{-23}$ | 28/56  | 1.16 (0.64,2.08) | 0.63 |
| Chromium                      |   |   |   |         |                   |                       |         |                     |                       |        |                  |      |
|                               | - | - | - | 101/232 | 1.00 ref          |                       | 25/232  | 1.00 ref            |                       | 76/232 | 1.00 ref         |      |
|                               | + | - | - | 0/8     | Not applicable    | NA                    | 0/8     | Not applicable      | NA                    | 0/8    | Not applicable   | NA   |
|                               | - | + | - | 139/228 | 1.46 (1.05,2.02)  | 0.024                 | 60/228  | 2.88 (1.7,4.9)      | $9.0 \times 10^{-5}$  | 79/228 | 1.03 (0.71,1.51) | 0.87 |
|                               | - | - | + | 263/182 | 3.16 (2.31,4.32)  | $4.4 \times 10^{-13}$ | 193/182 | 10.16 (6.28,16.45)  | $3.8 \times 10^{-21}$ | 70/182 | 1.10 (0.74,1.63) | 0.65 |
|                               | + | + | - | 11/19   | 1.53 (0.66,3.51)  | 0.32                  | 4/19    | 2.78 (0.82,9.35)    | 0.10                  | 7/19   | 1.07 (0.39,2.92) | 0.89 |
|                               | - | + | + | 435/236 | 4.39 (3.27,5.9)   | $9.1 \times 10^{-23}$ | 338/236 | 16.05 (10,25.77)    | $1.4 \times 10^{-30}$ | 97/236 | 1.21 (0.84,1.75) | 0.31 |
|                               | + | - | + | 9/11    | 1.65 (0.63,4.31)  | 0.30                  | 8/11    | 6.69 (2.28,19.66)   | $5.4 \times 10^{-4}$  | 1/11   | 0.18 (0.02,1.48) | 0.11 |
|                               | + | + | + | 37/9    | 8.83 (3.97,19.6)  | $8.8 \times 10^{-8}$  | 29/9    | 36.29 (14.67,89.73) | $7.5 \times 10^{-15}$ | 8/9    | 1.85 (0.64,5.36) | 0.26 |
| Diesel engine exhaust         |   |   |   |         |                   |                       |         |                     |                       |        |                  |      |
|                               | - | - | - | 101/232 | 1.00 ref          |                       | 25/232  | 1.00 ref            |                       | 76/232 | 1.00 ref         |      |
|                               | + | - | - | 10/27   | 0.77 (0.35,1.71)  | 0.52                  | 2/27    | 0.80 (0.17,3.65)    | 0.77                  | 8/27   | 0.72 (0.3,1.72)  | 0.46 |
|                               | - | + | - | 139/228 | 1.44 (1.04,2)     | 0.029                 | 60/228  | 2.74 (1.62,4.64)    | $1.7 \times 10^{-4}$  | 79/228 | 1.04 (0.71,1.51) | 0.85 |
|                               | - | - | + | 263/182 | 3.16 (2.31,4.31)  | $3.9 \times 10^{-13}$ | 193/182 | 9.96 (6.18,16.05)   | $3.6 \times 10^{-21}$ | 70/182 | 1.11 (0.75,1.65) | 0.59 |
|                               | + | + | - | 50/44   | 2.32 (1.40,3.86)  | $1.1 \times 10^{-3}$  | 23/44   | 5.47 (2.68,11.17)   | $3.1 \times 10^{-6}$  | 27/44  | 1.43 (0.79,2.59) | 0.23 |

|               |   |   |   |         |                    |                       |         |                      |                       |        |                   |       |
|---------------|---|---|---|---------|--------------------|-----------------------|---------|----------------------|-----------------------|--------|-------------------|-------|
|               | - | + | + | 435/236 | 4.35 (3.24,5.83)   | $1.0 \times 10^{-22}$ | 338/236 | 15.39 (9.64,24.56)   | $2.0 \times 10^{-30}$ | 97/236 | 1.22 (0.85,1.76)  | 0.28  |
|               | + | - | + | 41/22   | 3.95 (2.17,7.19)   | $7.0 \times 10^{-6}$  | 32/22   | 15.52 (7.49,32.18)   | $1.7 \times 10^{-13}$ | 9/22   | 0.87 (0.36,2.09)  | 0.76  |
|               | + | + | + | 158/47  | 7.31 (4.71,11.35)  | $8.4 \times 10^{-19}$ | 120/47  | 27.83 (15.41,50.26)  | $2.8 \times 10^{-28}$ | 38/47  | 1.93 (1.11,3.34)  | 0.020 |
| Hardwood dust |   |   |   |         |                    |                       |         |                      |                       |        |                   |       |
|               | - | - | - | 101/232 | 1.00 ref           |                       | 25/232  | 1.00 ref             |                       | 76/232 | 1.00 ref          |       |
|               | + | - | - | 10/19   | 1.41 (0.60,3.28)   | 0.43                  | 1/19    | 0.72 (0.09,5.98)     | 0.76                  | 9/19   | 1.43 (0.57,3.56)  | 0.45  |
|               | - | + | - | 139/228 | 1.46 (1.05,2.02)   | 0.024                 | 60/228  | 2.83 (1.67,4.8)      | $1.2 \times 10^{-4}$  | 79/228 | 1.05 (0.72,1.53)  | 0.81  |
|               | - | - | + | 263/182 | 3.22 (2.36,4.4)    | $1.8 \times 10^{-13}$ | 193/182 | 10.14 (6.27,16.4)    | $3.8 \times 10^{-21}$ | 70/182 | 1.14 (0.77,1.69)  | 0.52  |
|               | + | + | - | 21/30   | 1.55 (0.81,2.98)   | 0.19                  | 9/30    | 3.30 (1.32,8.25)     | 0.011                 | 12/30  | 1.01 (0.45,2.22)  | 0.99  |
|               | - | + | + | 435/236 | 4.46 (3.32,5.99)   | $3.1 \times 10^{-23}$ | 338/236 | 15.87 (9.9,25.45)    | $1.8 \times 10^{-30}$ | 97/236 | 1.24 (0.86,1.8)   | 0.24  |
|               | + | - | + | 26/16   | 3.65 (1.80,7.39)   | $3.3 \times 10^{-4}$  | 16/16   | 11.73 (4.9,28.09)    | $3.2 \times 10^{-8}$  | 10/16  | 1.45 (0.59,3.53)  | 0.42  |
|               | + | + | + | 82/31   | 6.33 (3.75,10.69)  | $5.2 \times 10^{-12}$ | 57/31   | 25.29 (12.82,49.88)  | $1.1 \times 10^{-20}$ | 25/31  | 1.87 (0.97,3.6)   | 0.061 |
| Herbicides    |   |   |   |         |                    |                       |         |                      |                       |        |                   |       |
|               | - | - | - | 101/232 | 1.00 ref           |                       | 25/232  | 1.00 ref             |                       | 76/232 | 1.00 ref          |       |
|               | + | - | - | 6/20    | 0.70 (0.26,1.87)   | 0.48                  | 1/20    | 0.54 (0.07,4.47)     | 0.57                  | 5/20   | 0.69 (0.24,2)     | 0.49  |
|               | - | + | - | 139/228 | 1.45 (1.04,2.01)   | 0.027                 | 60/228  | 2.89 (1.7,4.92)      | $9.3 \times 10^{-5}$  | 79/228 | 1.03 (0.7,1.5)    | 0.89  |
|               | - | - | + | 263/182 | 3.21 (2.35,4.38)   | $2.6 \times 10^{-13}$ | 193/182 | 10.38 (6.4,16.85)    | $2.7 \times 10^{-21}$ | 70/182 | 1.10 (0.74,1.64)  | 0.63  |
|               | + | + | - | 10/16   | 1.52 (0.62,3.7)    | 0.36                  | 4/16    | 2.93 (0.81,10.53)    | 0.10                  | 6/16   | 1.04 (0.36,3.03)  | 0.94  |
|               | - | + | + | 435/236 | 4.41 (3.28,5.93)   | $7.4 \times 10^{-23}$ | 338/236 | 16.24 (10.1,26.14)   | $1.5 \times 10^{-30}$ | 97/236 | 1.21 (0.84,1.76)  | 0.30  |
|               | + | - | + | 8/13    | 1.45 (0.56,3.75)   | 0.44                  | 1/13    | 0.64 (0.07,5.72)     | 0.69                  | 7/13   | 1.34 (0.49,3.68)  | 0.57  |
|               | + | + | + | 30/13   | 6.50 (3.11,13.58)  | $6.5 \times 10^{-7}$  | 25/13   | 29.77 (12.73,69.61)  | $4.9 \times 10^{-15}$ | 5/13   | 1.03 (0.3,3.49)   | 0.96  |
| Insecticides  |   |   |   |         |                    |                       |         |                      |                       |        |                   |       |
|               | - | - | - | 101/232 | 1.00 ref           |                       | 25/232  | 1.00 ref             |                       | 76/232 | 1.00 ref          |       |
|               | + | - | - | 3/4     | 1.55 (0.31,7.68)   | 0.59                  | 0/4     | Not applicable       | NA                    | 3/4    | 1.83 (0.35,9.46)  | 0.47  |
|               | - | + | - | 139/228 | 1.44 (1.04,2)      | 0.029                 | 60/228  | 2.82 (1.66,4.78)     | $1.3 \times 10^{-4}$  | 79/228 | 1.03 (0.7,1.5)    | 0.89  |
|               | - | - | + | 263/182 | 3.19 (2.33,4.35)   | $3.3 \times 10^{-13}$ | 193/182 | 10.06 (6.22,16.27)   | $4.8 \times 10^{-21}$ | 70/182 | 1.11 (0.74,1.64)  | 0.62  |
|               | + | + | - | 7/7     | 2.41 (0.78,7.44)   | 0.13                  | 2/7     | 3.86 (0.73,20.48)    | 0.11                  | 5/7    | 2.31 (0.65,8.2)   | 0.20  |
|               | - | + | + | 435/236 | 4.38 (3.26,5.88)   | $1.2 \times 10^{-22}$ | 338/236 | 15.75 (9.82,25.27)   | $2.7 \times 10^{-30}$ | 97/236 | 1.22 (0.84,1.76)  | 0.30  |
|               | + | - | + | 10/6    | 3.35 (1.11,10.06)  | 0.031                 | 8/6     | 12.05 (3.57,40.65)   | $6.0 \times 10^{-5}$  | 2/6    | 0.81 (0.15,4.4)   | 0.81  |
|               | + | + | + | 25/3    | 18.77 (5.40,65.24) | $3.9 \times 10^{-6}$  | 19/3    | 68.16 (17.93,259.08) | $5.8 \times 10^{-10}$ | 6/3    | 5.68 (1.31,24.64) | 0.020 |
| Iron          |   |   |   |         |                    |                       |         |                      |                       |        |                   |       |
|               | - | - | - | 101/232 | 1.00 ref           |                       | 25/232  | 1.00 ref             |                       | 76/232 | 1.00 ref          |       |
|               | + | - | - | 15/28   | 1.12 (0.55,2.26)   | 0.76                  | 5/28    | 1.93 (0.66,5.69)     | 0.23                  | 10/28  | 0.92 (0.41,2.06)  | 0.83  |
|               | - | + | - | 139/228 | 1.46 (1.05,2.02)   | 0.024                 | 60/228  | 2.77 (1.64,4.67)     | $1.4 \times 10^{-4}$  | 79/228 | 1.05 (0.72,1.53)  | 0.81  |
|               | - | - | + | 263/182 | 3.24 (2.37,4.42)   | $1.3 \times 10^{-13}$ | 193/182 | 10.21 (6.33,16.45)   | $1.4 \times 10^{-21}$ | 70/182 | 1.15 (0.78,1.7)   | 0.48  |

|                                  |   |   |   |         |                   |                       |         |                     |                       |        |                  |       |
|----------------------------------|---|---|---|---------|-------------------|-----------------------|---------|---------------------|-----------------------|--------|------------------|-------|
|                                  | + | + | - | 65/73   | 2.06 (1.31,3.23)  | $1.8 \times 10^{-3}$  | 26/73   | 3.88 (1.99,7.56)    | $6.7 \times 10^{-5}$  | 39/73  | 1.49 (0.88,2.54) | 0.14  |
|                                  | - | + | + | 435/236 | 4.45 (3.32,5.97)  | $2.4 \times 10^{-23}$ | 338/236 | 15.60 (9.78,24.89)  | $9.3 \times 10^{-31}$ | 97/236 | 1.27 (0.88,1.83) | 0.20  |
|                                  | + | - | + | 63/37   | 3.59 (2.16,5.97)  | $8.6 \times 10^{-7}$  | 44/37   | 11.83 (6.14,22.81)  | $1.6 \times 10^{-13}$ | 19/37  | 1.22 (0.62,2.4)  | 0.56  |
|                                  | + | + | + | 213/73  | 6.50 (4.35,9.7)   | $5.9 \times 10^{-20}$ | 169/73  | 24.99 (14.34,43.56) | $7.3 \times 10^{-30}$ | 44/73  | 1.48 (0.88,2.48) | 0.14  |
| Manmade mineral fibres           |   |   |   |         |                   |                       |         |                     |                       |        |                  |       |
|                                  | - | - | - | 101/232 | 1.00 ref          |                       | 25/232  | 1.00 ref            |                       | 76/232 | 1.00 ref         |       |
|                                  | + | - | - | 5/8     | 1.53 (0.46,5.08)  | 0.48                  | 1/8     | 1.83 (0.21,16.02)   | 0.59                  | 4/8    | 1.14 (0.3,4.29)  | 0.84  |
|                                  | - | + | - | 139/228 | 1.44 (1.04,2)     | 0.029                 | 60/228  | 2.79 (1.65,4.72)    | $1.4 \times 10^{-4}$  | 79/228 | 1.02 (0.7,1.49)  | 0.91  |
|                                  | - | - | + | 263/182 | 3.22 (2.36,4.39)  | $1.7 \times 10^{-13}$ | 193/182 | 10.01 (6.2,16.14)   | $3.8 \times 10^{-21}$ | 70/182 | 1.13 (0.76,1.67) | 0.55  |
|                                  | + | + | - | 21/23   | 1.90 (0.94,3.84)  | 0.072                 | 11/23   | 6.18 (2.48,15.39)   | $9.1 \times 10^{-5}$  | 10/23  | 0.90 (0.37,2.17) | 0.81  |
|                                  | - | + | + | 435/236 | 4.38 (3.26,5.87)  | $8.3 \times 10^{-23}$ | 338/236 | 15.50 (9.69,24.79)  | $2.5 \times 10^{-30}$ | 97/236 | 1.22 (0.84,1.76) | 0.29  |
|                                  | + | - | + | 21/14   | 3.29 (1.53,7.09)  | $2.3 \times 10^{-3}$  | 12/14   | 10.06 (3.88,26.12)  | $2.1 \times 10^{-6}$  | 9/14   | 1.35 (0.52,3.49) | 0.53  |
|                                  | + | + | + | 72/28   | 6.22 (3.56,10.87) | $1.4 \times 10^{-10}$ | 50/28   | 24.53 (12.02,50.05) | $1.4 \times 10^{-18}$ | 22/28  | 1.82 (0.91,3.67) | 0.092 |
| Other organic solvents           |   |   |   |         |                   |                       |         |                     |                       |        |                  |       |
|                                  | - | - | - | 101/232 | 1.00 ref          |                       | 25/232  | 1.00 ref            |                       | 76/232 | 1.00 ref         |       |
|                                  | + | - | - | 0/6     | Not applicable    | NA                    | 0/6     | Not applicable      | NA                    | 0/6    | Not applicable   | NA    |
|                                  | - | + | - | 139/228 | 1.46 (1.05,2.03)  | 0.025                 | 60/228  | 2.89 (1.7,4.92)     | $9.3 \times 10^{-5}$  | 79/228 | 1.03 (0.71,1.51) | 0.86  |
|                                  | - | - | + | 263/182 | 3.19 (2.34,4.36)  | $3.2 \times 10^{-13}$ | 193/182 | 10.26 (6.32,16.64)  | $4.1 \times 10^{-21}$ | 70/182 | 1.11 (0.75,1.65) | 0.60  |
|                                  | + | + | - | 9/7     | 2.31 (0.80,6.71)  | 0.12                  | 4/7     | 4.71 (1.17,19.01)   | 0.029                 | 5/7    | 1.27 (0.36,4.46) | 0.71  |
|                                  | - | + | + | 435/236 | 4.41 (3.28,5.92)  | $8.2 \times 10^{-23}$ | 338/236 | 16.18 (10.05,26.03) | $1.9 \times 10^{-30}$ | 97/236 | 1.23 (0.85,1.77) | 0.28  |
|                                  | + | - | + | 14/7    | 4.26 (1.60,11.35) | $3.8 \times 10^{-3}$  | 9/7     | 12.37 (3.93,38.92)  | $1.7 \times 10^{-5}$  | 5/7    | 2.07 (0.59,7.28) | 0.26  |
|                                  | + | + | + | 29/11   | 5.60 (2.59,12.14) | $1.2 \times 10^{-5}$  | 21/11   | 22.77 (9.19,56.44)  | $1.5 \times 10^{-11}$ | 8/11   | 1.84 (0.67,5.08) | 0.24  |
| Plant dust                       |   |   |   |         |                   |                       |         |                     |                       |        |                  |       |
|                                  | - | - | - | 101/232 | 1.00 ref          |                       | 25/232  | 1.00 ref            |                       | 76/232 | 1.00 ref         |       |
|                                  | + | - | - | 10/27   | 0.83 (0.37,1.85)  | 0.65                  | 2/27    | 0.82 (0.17,3.87)    | 0.80                  | 8/27   | 0.75 (0.31,1.81) | 0.53  |
|                                  | - | + | - | 139/228 | 1.43 (1.03,1.98)  | 0.033                 | 60/228  | 2.75 (1.63,4.67)    | $1.6 \times 10^{-4}$  | 79/228 | 1.02 (0.7,1.49)  | 0.91  |
|                                  | - | - | + | 263/182 | 3.19 (2.34,4.36)  | $2.6 \times 10^{-13}$ | 193/182 | 10.06 (6.23,16.23)  | $3.5 \times 10^{-21}$ | 70/182 | 1.11 (0.75,1.64) | 0.61  |
|                                  | + | + | - | 22/26   | 1.78 (0.91,3.48)  | 0.092                 | 9/26    | 3.37 (1.32,8.59)    | 0.011                 | 13/26  | 1.30 (0.58,2.89) | 0.53  |
|                                  | - | + | + | 435/236 | 4.37 (3.25,5.86)  | $1.0 \times 10^{-22}$ | 338/236 | 15.53 (9.71,24.84)  | $2.2 \times 10^{-30}$ | 97/236 | 1.21 (0.84,1.75) | 0.31  |
|                                  | + | - | + | 19/21   | 1.71 (0.84,3.47)  | 0.14                  | 7/21    | 2.45 (0.87,6.84)    | 0.088                 | 12/21  | 1.24 (0.55,2.81) | 0.60  |
|                                  | + | + | + | 64/24   | 6.33 (3.60,11.13) | $1.4 \times 10^{-10}$ | 53/24   | 26.96 (13.52,53.75) | $8.2 \times 10^{-21}$ | 11/24  | 1.09 (0.47,2.54) | 0.84  |
| Polycyclic aromatic hydrocarbons |   |   |   |         |                   |                       |         |                     |                       |        |                  |       |
|                                  | - | - | - | 101/232 | 1.00 ref          |                       | 25/232  | 1.00 ref            |                       | 76/232 | 1.00 ref         |       |
|                                  | + | - | - | 10/24   | 0.91 (0.40,2.04)  | 0.82                  | 5/24    | 2.26 (0.76,6.79)    | 0.14                  | 5/24   | 0.53 (0.18,1.5)  | 0.23  |

|                    |   |   |         |                   |                       |         |                     |                       |        |                  |                      |
|--------------------|---|---|---------|-------------------|-----------------------|---------|---------------------|-----------------------|--------|------------------|----------------------|
| -                  | + | - | 139/228 | 1.44 (1.04,2)     | 0.029                 | 60/228  | 2.72 (1.61,4.6)     | $1.8 \times 10^{-4}$  | 79/228 | 1.03 (0.71,1.51) | 0.86                 |
| -                  | - | + | 263/182 | 3.20 (2.35,4.37)  | $2.1 \times 10^{-13}$ | 193/182 | 10.08 (6.26,16.24)  | $2.1 \times 10^{-21}$ | 70/182 | 1.13 (0.76,1.67) | 0.54                 |
| +                  | + | - | 53/60   | 2.04 (1.26,3.3)   | $3.5 \times 10^{-3}$  | 23/60   | 4.10 (2.05,8.19)    | $6.4 \times 10^{-5}$  | 30/60  | 1.43 (0.81,2.53) | 0.22                 |
| -                  | + | + | 435/236 | 4.39 (3.27,5.88)  | $6.1 \times 10^{-23}$ | 338/236 | 15.41 (9.67,24.58)  | $1.5 \times 10^{-30}$ | 97/236 | 1.24 (0.86,1.79) | 0.25                 |
| +                  | - | + | 42/29   | 2.95 (1.66,5.23)  | $2.1 \times 10^{-4}$  | 31/29   | 10.54 (5.16,21.52)  | $1.0 \times 10^{-10}$ | 11/29  | 0.79 (0.35,1.76) | 0.56                 |
| +                  | + | + | 160/60  | 5.65 (3.70,8.63)  | $1.1 \times 10^{-15}$ | 125/60  | 21.61 (12.18,38.36) | $9.0 \times 10^{-26}$ | 35/60  | 1.32 (0.76,2.3)  | 0.33                 |
| Stone and concrete |   |   |         |                   |                       |         |                     |                       |        |                  |                      |
| -                  | - | - | 101/232 | 1.00 ref          |                       | 25/232  | 1.00 ref            |                       | 76/232 | 1.00 ref         |                      |
| +                  | - | - | 17/41   | 0.88 (0.46,1.68)  | 0.70                  | 4/41    | 1.02 (0.33,3.18)    | 0.97                  | 13/41  | 0.81 (0.39,1.65) | 0.56                 |
| -                  | + | - | 139/228 | 1.43 (1.03,1.98)  | 0.032                 | 60/228  | 2.69 (1.6,4.53)     | $2.0 \times 10^{-4}$  | 79/228 | 1.03 (0.71,1.5)  | 0.87                 |
| -                  | - | + | 263/182 | 3.18 (2.33,4.33)  | $2.4 \times 10^{-13}$ | 193/182 | 9.82 (6.11,15.78)   | $3.7 \times 10^{-21}$ | 70/182 | 1.13 (0.77,1.67) | 0.54                 |
| +                  | + | - | 74/71   | 2.12 (1.36,3.31)  | $9.9 \times 10^{-4}$  | 32/71   | 4.46 (2.33,8.52)    | $6.1 \times 10^{-6}$  | 42/71  | 1.41 (0.84,2.37) | 0.20                 |
| -                  | + | + | 435/236 | 4.32 (3.23,5.79)  | $1.0 \times 10^{-22}$ | 338/236 | 14.97 (9.42,23.81)  | $2.7 \times 10^{-30}$ | 97/236 | 1.22 (0.85,1.76) | 0.28                 |
| +                  | - | + | 68/34   | 4.00 (2.40,6.65)  | $9.3 \times 10^{-8}$  | 44/34   | 12.68 (6.56,24.49)  | $4.1 \times 10^{-14}$ | 24/34  | 1.49 (0.79,2.8)  | 0.22                 |
| +                  | + | + | 247/76  | 7.00 (4.74,10.35) | $1.4 \times 10^{-22}$ | 180/76  | 25.18 (14.53,43.63) | $1.3 \times 10^{-30}$ | 67/76  | 2.13 (1.33,3.41) | $1.7 \times 10^{-3}$ |
| Wood dust          |   |   |         |                   |                       |         |                     |                       |        |                  |                      |
| -                  | - | - | 101/232 | 1.00 ref          |                       | 25/232  | 1.00 ref            |                       | 76/232 | 1.00 ref         |                      |
| +                  | - | - | 10/19   | 1.41 (0.60,3.29)  | 0.43                  | 1/19    | 0.72 (0.09,5.97)    | 0.76                  | 9/19   | 1.43 (0.57,3.55) | 0.45                 |
| -                  | + | - | 139/228 | 1.46 (1.05,2.03)  | 0.024                 | 60/228  | 2.83 (1.67,4.81)    | $1.1 \times 10^{-4}$  | 79/228 | 1.05 (0.72,1.53) | 0.81                 |
| -                  | - | + | 263/182 | 3.22 (2.36,4.4)   | $1.8 \times 10^{-13}$ | 193/182 | 10.12 (6.25,16.36)  | $4.0 \times 10^{-21}$ | 70/182 | 1.14 (0.77,1.69) | 0.51                 |
| +                  | + | - | 22/30   | 1.63 (0.86,3.1)   | 0.14                  | 9/30    | 3.31 (1.32,8.28)    | 0.010                 | 13/30  | 1.11 (0.51,2.41) | 0.80                 |
| -                  | + | + | 435/236 | 4.46 (3.32,5.99)  | $3.1 \times 10^{-23}$ | 338/236 | 15.85 (9.88,25.41)  | $1.8 \times 10^{-30}$ | 97/236 | 1.25 (0.86,1.8)  | 0.24                 |
| +                  | - | + | 27/17   | 3.53 (1.77,7.05)  | $3.5 \times 10^{-4}$  | 17/17   | 11.60 (4.93,27.28)  | $1.9 \times 10^{-8}$  | 10/17  | 1.34 (0.55,3.23) | 0.52                 |
| +                  | + | + | 83/31   | 6.43 (3.81,10.83) | $2.9 \times 10^{-12}$ | 58/31   | 25.72 (13.08,50.58) | $4.8 \times 10^{-21}$ | 25/31  | 1.87 (0.97,3.61) | 0.060                |

**Supplementary Table 6. The combined effects of inhalable agents, smoking, and HLA-SE alleles with risk of RA.** Estimates adjusted for age, sex, residential areas, body mass index, levels of education, alcohol drinking, and principal components 1-10. For the OR estimates that were not available due to the limited number of cases within the subgroup, 'not applicable' was marked in corresponding cells.

| Occupational exposure                 | Smoking | HLA-SE | Overall RA         |                   |                       | ACPA-positive subtype |                    |                       | ACPA-negative subtype |                   |                      |
|---------------------------------------|---------|--------|--------------------|-------------------|-----------------------|-----------------------|--------------------|-----------------------|-----------------------|-------------------|----------------------|
|                                       |         |        | N (case / control) | OR (95%CI)        | P                     | N (case / control)    | OR (95%CI)         | P                     | N (case / control)    | OR (95%CI)        | P                    |
| Exposed to any agents                 |         |        |                    |                   |                       |                       |                    |                       |                       |                   |                      |
| -                                     | -       | -      | 106/185            | 1.00 ref          |                       | 36/185                | 1.00 ref           |                       | 70/185                | 1.00 ref          |                      |
| +                                     | -       | -      | 210/383            | 1.01 (0.73,1.4)   | 0.96                  | 74/383                | 0.94 (0.58,1.52)   | 0.79                  | 136/383               | 1.03 (0.71,1.5)   | 0.86                 |
| -                                     | +       | -      | 145/229            | 1.35 (0.95,1.92)  | 0.096                 | 66/229                | 1.74 (1.06,2.87)   | 0.030                 | 79/229                | 1.09 (0.72,1.66)  | 0.67                 |
| -                                     | -       | +      | 239/196            | 2.46 (1.76,3.45)  | 1.4×10 <sup>-7</sup>  | 167/196               | 5.01 (3.19,7.88)   | 3.1×10 <sup>-12</sup> | 72/196                | 1.13 (0.74,1.72)  | 0.58                 |
| +                                     | +       | -      | 418/518            | 1.64 (1.21,2.22)  | 1.3×10 <sup>-3</sup>  | 170/518               | 2.04 (1.32,3.16)   | 1.3×10 <sup>-3</sup>  | 248/518               | 1.41 (0.99,2)     | 0.055                |
| -                                     | +       | +      | 414/237            | 3.51 (2.56,4.81)  | 7.4×10 <sup>-15</sup> | 325/237               | 8.33 (5.4,12.86)   | 1.0×10 <sup>-21</sup> | 89/237                | 1.09 (0.73,1.65)  | 0.66                 |
| +                                     | -       | +      | 534/420            | 2.34 (1.73,3.16)  | 2.8×10 <sup>-8</sup>  | 364/420               | 4.68 (3.07,7.13)   | 8.0×10 <sup>-13</sup> | 170/420               | 1.1 (0.76,1.59)   | 0.61                 |
| +                                     | +       | +      | 1337/598           | 4.42 (3.32,5.88)  | 2.1×10 <sup>-24</sup> | 1030/598              | 10.23 (6.79,15.4)  | 8.6×10 <sup>-29</sup> | 307/598               | 1.51 (1.07,2.12)  | 0.019                |
| <b>The sixteen independent agents</b> |         |        |                    |                   |                       |                       |                    |                       |                       |                   |                      |
| Asbestos                              |         |        |                    |                   |                       |                       |                    |                       |                       |                   |                      |
| -                                     | -       | -      | 106/185            | 1.00 ref          |                       | 36/185                | 1.00 ref           |                       | 70/185                | 1.00 ref          |                      |
| +                                     | -       | -      | 4/5                | 2.07 (0.47,9.08)  | 0.33                  | 2/5                   | 3.5 (0.58,21.22)   | 0.17                  | 2/5                   | 1.2 (0.2,7.4)     | 0.84                 |
| -                                     | +       | -      | 145/229            | 1.32 (0.92,1.88)  | 0.13                  | 66/229                | 1.76 (1.05,2.92)   | 0.030                 | 79/229                | 1.03 (0.68,1.58)  | 0.88                 |
| -                                     | -       | +      | 239/196            | 2.53 (1.8,3.54)   | 8.1×10 <sup>-8</sup>  | 167/196               | 5.17 (3.27,8.18)   | 2.2×10 <sup>-12</sup> | 72/196                | 1.13 (0.73,1.74)  | 0.58                 |
| +                                     | +       | -      | 24/29              | 1.71 (0.84,3.5)   | 0.14                  | 10/29                 | 2.93 (1.15,7.45)   | 0.024                 | 14/29                 | 1.02 (0.43,2.43)  | 0.97                 |
| -                                     | +       | +      | 414/237            | 3.52 (2.55,4.86)  | 1.7×10 <sup>-14</sup> | 325/237               | 8.61 (5.52,13.43)  | 2.1×10 <sup>-21</sup> | 89/237                | 1.05 (0.69,1.6)   | 0.80                 |
| +                                     | -       | +      | 17/13              | 2.82 (1.18,6.72)  | 0.020                 | 13/13                 | 7.32 (2.71,19.74)  | 8.4×10 <sup>-5</sup>  | 4/13                  | 0.84 (0.25,2.9)   | 0.79                 |
| +                                     | +       | +      | 74/18              | 8.55 (4.4,16.59)  | 2.3×10 <sup>-10</sup> | 53/18                 | 20.09 (9.33,43.24) | 1.7×10 <sup>-14</sup> | 21/18                 | 2.98 (1.3,6.79)   | 9.6×10 <sup>-3</sup> |
| Cadmium                               |         |        |                    |                   |                       |                       |                    |                       |                       |                   |                      |
| -                                     | -       | -      | 106/185            | 1.00 ref          |                       | 36/185                | 1.00 ref           |                       | 70/185                | 1.00 ref          |                      |
| +                                     | -       | -      | 2/4                | 0.71 (0.04,12.52) | 0.81                  | 1/4                   | Not applicable     | NA                    | 1/4                   | 1.38 (0.08,25.33) | 0.83                 |
| -                                     | +       | -      | 145/229            | 1.31 (0.92,1.88)  | 0.14                  | 66/229                | 1.75 (1.05,2.93)   | 0.032                 | 79/229                | 1.04 (0.68,1.59)  | 0.86                 |
| -                                     | -       | +      | 239/196            | 2.55 (1.81,3.58)  | 7.4×10 <sup>-8</sup>  | 167/196               | 5.24 (3.3,8.32)    | 2.2×10 <sup>-12</sup> | 72/196                | 1.13 (0.73,1.74)  | 0.59                 |
| +                                     | +       | -      | 3/6                | 0.55 (0.1,3.13)   | 0.50                  | 2/6                   | 1.73 (0.29,10.29)  | 0.55                  | 1/6                   | Not applicable    | NA                   |
| -                                     | +       | +      | 414/237            | 3.56 (2.58,4.92)  | 1.4×10 <sup>-14</sup> | 325/237               | 8.8 (5.62,13.77)   | 2.0×10 <sup>-21</sup> | 89/237                | 1.07 (0.7,1.63)   | 0.75                 |



|                 |   |   |   |         |                   |                       |         |                    |                       |         |                   |                      |
|-----------------|---|---|---|---------|-------------------|-----------------------|---------|--------------------|-----------------------|---------|-------------------|----------------------|
|                 | + | - | + | 3/5     | 0.93 (0.21,4.21)  | 0.93                  | 3/5     | 2.71 (0.58,12.67)  | 0.21                  | 0/5     | Not applicable    | NA                   |
|                 | + | + | + | 17/7    | 7.66 (2.37,24.71) | 6.6×10 <sup>-4</sup>  | 13/7    | 18.14 (5.13,64.07) | 6.8×10 <sup>-6</sup>  | 4/7     | 2.96 (0.64,13.8)  | 0.17                 |
| Carbon monoxide |   |   |   |         |                   |                       |         |                    |                       |         |                   |                      |
|                 | - | - | - | 106/185 | 1.00 ref          |                       | 36/185  | 1.00 ref           |                       | 70/185  | 1.00 ref          |                      |
|                 | + | - | - | 31/38   | 1.47 (0.82,2.65)  | 0.20                  | 10/38   | 1.46 (0.62,3.48)   | 0.39                  | 21/38   | 1.46 (0.74,2.87)  | 0.27                 |
|                 | - | + | - | 145/229 | 1.35 (0.95,1.93)  | 0.097                 | 66/229  | 1.78 (1.07,2.96)   | 0.026                 | 79/229  | 1.09 (0.72,1.67)  | 0.68                 |
|                 | - | - | + | 239/196 | 2.51 (1.79,3.52)  | 1.0×10 <sup>-7</sup>  | 167/196 | 5.18 (3.28,8.2)    | 2.1×10 <sup>-12</sup> | 72/196  | 1.13 (0.73,1.74)  | 0.58                 |
|                 | + | + | - | 88/102  | 1.54 (0.99,2.4)   | 0.057                 | 29/102  | 1.61 (0.85,3.04)   | 0.14                  | 59/102  | 1.42 (0.84,2.39)  | 0.19                 |
|                 | - | + | + | 414/237 | 3.56 (2.59,4.91)  | 8.0×10 <sup>-15</sup> | 325/237 | 8.64 (5.55,13.46)  | 1.5×10 <sup>-21</sup> | 89/237  | 1.1 (0.72,1.66)   | 0.66                 |
|                 | + | - | + | 67/51   | 2.31 (1.39,3.81)  | 1.1×10 <sup>-3</sup>  | 49/51   | 5.14 (2.78,9.49)   | 1.7×10 <sup>-7</sup>  | 18/51   | 0.89 (0.44,1.79)  | 0.73                 |
|                 | + | + | + | 311/102 | 5.67 (3.83,8.38)  | 3.7×10 <sup>-18</sup> | 245/102 | 13.77 (8.3,22.85)  | 3.5×10 <sup>-24</sup> | 66/102  | 1.68 (1.02,2.76)  | 0.042                |
| Detergents      |   |   |   |         |                   |                       |         |                    |                       |         |                   |                      |
|                 | - | - | - | 106/185 | 1.00 ref          |                       | 36/185  | 1.00 ref           |                       | 70/185  | 1.00 ref          |                      |
|                 | + | - | - | 147/245 | 1.06 (0.74,1.5)   | 0.76                  | 54/245  | 1.01 (0.6,1.71)    | 0.96                  | 93/245  | 1.06 (0.71,1.6)   | 0.77                 |
|                 | - | + | - | 145/229 | 1.34 (0.94,1.9)   | 0.11                  | 66/229  | 1.68 (1.02,2.76)   | 0.042                 | 79/229  | 1.09 (0.72,1.66)  | 0.68                 |
|                 | - | - | + | 239/196 | 2.47 (1.76,3.45)  | 1.3×10 <sup>-7</sup>  | 167/196 | 4.96 (3.16,7.79)   | 3.7×10 <sup>-12</sup> | 72/196  | 1.14 (0.75,1.75)  | 0.54                 |
|                 | + | + | - | 291/345 | 1.67 (1.22,2.29)  | 1.5×10 <sup>-3</sup>  | 115/345 | 1.99 (1.26,3.13)   | 2.9×10 <sup>-3</sup>  | 176/345 | 1.48 (1.02,2.14)  | 0.038                |
|                 | - | + | + | 414/237 | 3.48 (2.54,4.78)  | 1.1×10 <sup>-14</sup> | 325/237 | 8.07 (5.23,12.44)  | 3.3×10 <sup>-21</sup> | 89/237  | 1.1 (0.73,1.65)   | 0.65                 |
|                 | + | - | + | 329/285 | 2.05 (1.49,2.82)  | 9.6×10 <sup>-6</sup>  | 222/285 | 4.04 (2.61,6.25)   | 3.8×10 <sup>-10</sup> | 107/285 | 0.96 (0.64,1.43)  | 0.83                 |
|                 | + | + | + | 930/387 | 4.64 (3.45,6.23)  | 2.2×10 <sup>-24</sup> | 718/387 | 10.56 (6.97,16)    | 9.2×10 <sup>-29</sup> | 212/387 | 1.62 (1.13,2.32)  | 8.9×10 <sup>-3</sup> |
| Flour dust      |   |   |   |         |                   |                       |         |                    |                       |         |                   |                      |
|                 | - | - | - | 106/185 | 1.00 ref          |                       | 36/185  | 1.00 ref           |                       | 70/185  | 1.00 ref          |                      |
|                 | + | - | - | 4/6     | 1.78 (0.44,7.23)  | 0.42                  | 0/6     | Not applicable     | NA                    | 4/6     | 2.34 (0.56,9.79)  | 0.24                 |
|                 | - | + | - | 145/229 | 1.32 (0.92,1.88)  | 0.13                  | 66/229  | 1.76 (1.05,2.93)   | 0.031                 | 79/229  | 1.07 (0.7,1.64)   | 0.76                 |
|                 | - | - | + | 239/196 | 2.51 (1.78,3.52)  | 1.2×10 <sup>-7</sup>  | 167/196 | 5.12 (3.23,8.13)   | 4.1×10 <sup>-12</sup> | 72/196  | 1.14 (0.74,1.75)  | 0.56                 |
|                 | + | + | - | 6/4     | 2.62 (0.68,10.05) | 0.16                  | 3/4     | 4.03 (0.78,20.95)  | 0.097                 | 3/4     | 1.96 (0.38,10.04) | 0.42                 |
|                 | - | + | + | 414/237 | 3.55 (2.57,4.91)  | 1.3×10 <sup>-14</sup> | 325/237 | 8.69 (5.55,13.59)  | 3.0×10 <sup>-21</sup> | 89/237  | 1.1 (0.73,1.68)   | 0.65                 |
|                 | + | - | + | 9/6     | 2.93 (0.95,9.04)  | 0.061                 | 6/6     | 7.38 (2.05,26.54)  | 2.2×10 <sup>-3</sup>  | 3/6     | 0.81 (0.18,3.63)  | 0.78                 |
|                 | + | + | + | 13/6    | 3.14 (1.06,9.33)  | 0.040                 | 8/6     | 7.25 (2.11,24.92)  | 1.7×10 <sup>-3</sup>  | 5/6     | 1.18 (0.25,5.55)  | 0.84                 |
| Fungicides      |   |   |   |         |                   |                       |         |                    |                       |         |                   |                      |
|                 | - | - | - | 106/185 | 1.00 ref          |                       | 36/185  | 1.00 ref           |                       | 70/185  | 1.00 ref          |                      |
|                 | + | - | - | 4/7     | 0.9 (0.2,3.95)    | 0.88                  | 1/7     | Not applicable     | NA                    | 3/7     | 1.36 (0.29,6.28)  | 0.69                 |
|                 | - | + | - | 145/229 | 1.31 (0.91,1.87)  | 0.14                  | 66/229  | 1.75 (1.05,2.92)   | 0.032                 | 79/229  | 1.04 (0.68,1.59)  | 0.87                 |

|                         |   |   |         |                    |                       |         |                       |                       |        |                    |       |
|-------------------------|---|---|---------|--------------------|-----------------------|---------|-----------------------|-----------------------|--------|--------------------|-------|
| -                       | - | + | 239/196 | 2.52 (1.79,3.54)   | $1.0 \times 10^{-7}$  | 167/196 | 5.16 (3.25,8.18)      | $3.3 \times 10^{-12}$ | 72/196 | 1.12 (0.73,1.73)   | 0.61  |
| +                       | + | - | 7/8     | 1.09 (0.33,3.65)   | 0.88                  | 3/8     | 0.8 (0.09,6.89)       | 0.84                  | 4/8    | 1.35 (0.37,5.01)   | 0.65  |
| -                       | + | + | 414/237 | 3.53 (2.56,4.88)   | $1.9 \times 10^{-14}$ | 325/237 | 8.7 (5.56,13.61)      | $2.7 \times 10^{-21}$ | 89/237 | 1.07 (0.7,1.62)    | 0.77  |
| +                       | - | + | 9/3     | 5.62 (1.36,23.32)  | 0.017                 | 8/3     | 14.25 (3.16,64.26)    | $5.5 \times 10^{-4}$  | 1/3    | 0.73 (0.06,8.45)   | 0.80  |
| +                       | + | + | 24/1    | 47.9 (6.22,368.86) | $2.0 \times 10^{-4}$  | 19/1    | 133.7 (16.28,1097.75) | $5.2 \times 10^{-6}$  | 5/1    | 23.65 (1.8,310.98) | 0.016 |
| Gasoline engine exhaust |   |   |         |                    |                       |         |                       |                       |        |                    |       |
| -                       | - | - | 106/185 | 1.00 ref           |                       | 36/185  | 1.00 ref              |                       | 70/185 | 1.00 ref           |       |
| +                       | - | - | 5/9     | 1.36 (0.4,4.67)    | 0.63                  | 0/9     | Not applicable        | NA                    | 5/9    | 1.64 (0.46,5.89)   | 0.45  |
| -                       | + | - | 145/229 | 1.3 (0.91,1.86)    | 0.15                  | 66/229  | 1.73 (1.04,2.88)      | 0.036                 | 79/229 | 1.04 (0.68,1.58)   | 0.87  |
| -                       | - | + | 239/196 | 2.51 (1.79,3.52)   | $1.1 \times 10^{-7}$  | 167/196 | 5.14 (3.24,8.15)      | $3.4 \times 10^{-12}$ | 72/196 | 1.13 (0.73,1.74)   | 0.58  |
| +                       | + | - | 20/16   | 2.77 (1.26,6.06)   | 0.011                 | 8/16    | 3.66 (1.31,10.2)      | 0.013                 | 12/16  | 2.25 (0.91,5.58)   | 0.080 |
| -                       | + | + | 414/237 | 3.5 (2.54,4.83)    | $2.6 \times 10^{-14}$ | 325/237 | 8.61 (5.51,13.45)     | $3.4 \times 10^{-21}$ | 89/237 | 1.05 (0.69,1.6)    | 0.81  |
| +                       | - | + | 15/9    | 2.69 (1.05,6.91)   | 0.040                 | 10/9    | 6 (2.09,17.26)        | $8.8 \times 10^{-4}$  | 5/9    | 1.14 (0.28,4.67)   | 0.85  |
| +                       | + | + | 64/19   | 8.34 (4.21,16.52)  | $1.2 \times 10^{-9}$  | 50/19   | 23.7 (10.86,51.73)    | $1.9 \times 10^{-15}$ | 14/19  | 2.04 (0.83,4.99)   | 0.12  |
| Lead                    |   |   |         |                    |                       |         |                       |                       |        |                    |       |
| -                       | - | - | 106/185 | 1.00 ref           |                       | 36/185  | 1.00 ref              |                       | 70/185 | 1.00 ref           |       |
| +                       | - | - | 7/13    | 1.04 (0.36,3.03)   | 0.95                  | 2/13    | 0.97 (0.20,4.85)      | 0.97                  | 5/13   | 0.99 (0.28,3.44)   | 0.98  |
| -                       | + | - | 145/229 | 1.28 (0.9,1.83)    | 0.17                  | 66/229  | 1.72 (1.03,2.87)      | 0.037                 | 79/229 | 1 (0.65,1.53)      | 10    |
| -                       | - | + | 239/196 | 2.51 (1.79,3.52)   | $1.1 \times 10^{-7}$  | 167/196 | 5.14 (3.24,8.14)      | $3.5 \times 10^{-12}$ | 72/196 | 1.13 (0.73,1.74)   | 0.57  |
| +                       | + | - | 17/43   | 0.9 (0.44,1.82)    | 0.77                  | 7/43    | 1.35 (0.52,3.49)      | 0.53                  | 10/43  | 0.69 (0.28,1.69)   | 0.41  |
| -                       | + | + | 414/237 | 3.47 (2.51,4.79)   | $3.6 \times 10^{-14}$ | 325/237 | 8.56 (5.48,13.38)     | $4.1 \times 10^{-21}$ | 89/237 | 1.04 (0.69,1.58)   | 0.85  |
| +                       | - | + | 20/11   | 3.54 (1.55,8.12)   | $2.8 \times 10^{-3}$  | 16/11   | 9.21 (3.64,23.33)     | $2.8 \times 10^{-6}$  | 4/11   | 1.1 (0.32,3.83)    | 0.88  |
| +                       | + | + | 62/25   | 4.61 (2.58,8.24)   | $2.4 \times 10^{-7}$  | 52/25   | 12.34 (6.22,24.47)    | $6.3 \times 10^{-13}$ | 10/25  | 1.11 (0.47,2.61)   | 0.82  |
| Oil mist                |   |   |         |                    |                       |         |                       |                       |        |                    |       |
| -                       | - | - | 106/185 | 1.00 ref           |                       | 36/185  | 1.00 ref              |                       | 70/185 | 1.00 ref           |       |
| +                       | - | - | 2/15    | 0.22 (0.05,1.09)   | 0.064                 | 0/15    | Not applicable        | NA                    | 2/15   | 0.32 (0.06,1.58)   | 0.16  |
| -                       | + | - | 145/229 | 1.3 (0.91,1.86)    | 0.15                  | 66/229  | 1.73 (1.04,2.88)      | 0.035                 | 79/229 | 1.04 (0.68,1.59)   | 0.85  |
| -                       | - | + | 239/196 | 2.49 (1.78,3.5)    | $1.2 \times 10^{-7}$  | 167/196 | 5.1 (3.23,8.08)       | $3.4 \times 10^{-12}$ | 72/196 | 1.14 (0.74,1.75)   | 0.56  |
| +                       | + | - | 24/27   | 1.7 (0.84,3.45)    | 0.14                  | 8/27    | 2.49 (0.96,6.43)      | 0.060                 | 16/27  | 1.28 (0.54,3.04)   | 0.58  |
| -                       | + | + | 414/237 | 3.5 (2.54,4.83)    | $2.2 \times 10^{-14}$ | 325/237 | 8.58 (5.5,13.39)      | $2.5 \times 10^{-21}$ | 89/237 | 1.07 (0.7,1.62)    | 0.76  |
| +                       | - | + | 17/12   | 2.48 (1.03,5.97)   | 0.043                 | 13/12   | 6.41 (2.35,17.47)     | $2.9 \times 10^{-4}$  | 4/12   | 0.66 (0.18,2.35)   | 0.52  |
| +                       | + | + | 79/27   | 5.78 (3.2,10.45)   | $6.0 \times 10^{-9}$  | 63/27   | 15.46 (7.72,30.93)    | $1.0 \times 10^{-14}$ | 16/27  | 1.44 (0.63,3.29)   | 0.39  |

## Pulp or paper dust

|   |   |   |         |                  |                       |         |                   |                       |        |                  |      |
|---|---|---|---------|------------------|-----------------------|---------|-------------------|-----------------------|--------|------------------|------|
| - | - | - | 106/185 | 1.00 ref         |                       | 36/185  | 1.00 ref          |                       | 70/185 | 1.00 ref         |      |
| + | - | - | 13/31   | 0.78 (0.36,1.71) | 0.54                  | 5/31    | 0.87 (0.27,2.8)   | 0.81                  | 8/31   | 0.66 (0.26,1.66) | 0.38 |
| - | + | - | 145/229 | 1.31 (0.92,1.88) | 0.13                  | 66/229  | 1.79 (1.07,2.98)  | 0.026                 | 79/229 | 1.04 (0.68,1.58) | 0.86 |
| - | - | + | 239/196 | 2.49 (1.78,3.5)  | $1.3 \times 10^{-7}$  | 167/196 | 5.2 (3.28,8.25)   | $2.5 \times 10^{-12}$ | 72/196 | 1.13 (0.73,1.73) | 0.59 |
| + | + | - | 27/38   | 2.04 (1.09,3.81) | 0.026                 | 19/38   | 4.34 (2.06,9.15)  | $1.1 \times 10^{-4}$  | 8/38   | 1.06 (0.43,2.6)  | 0.90 |
| - | + | + | 414/237 | 3.53 (2.56,4.87) | $1.6 \times 10^{-14}$ | 325/237 | 8.84 (5.65,13.82) | $1.2 \times 10^{-21}$ | 89/237 | 1.07 (0.7,1.61)  | 0.76 |
| + | - | + | 52/26   | 3.01 (1.66,5.45) | $2.7 \times 10^{-4}$  | 38/26   | 6.83 (3.37,13.85) | $9.8 \times 10^{-8}$  | 14/26  | 1.13 (0.5,2.53)  | 0.77 |
| + | + | + | 118/48  | 4.32 (2.74,6.8)  | $2.6 \times 10^{-10}$ | 90/48   | 10.7 (6.09,18.8)  | $1.7 \times 10^{-16}$ | 28/48  | 1.45 (0.79,2.64) | 0.23 |

## Quartz dust

|   |   |   |         |                   |                       |         |                    |                       |        |                  |       |
|---|---|---|---------|-------------------|-----------------------|---------|--------------------|-----------------------|--------|------------------|-------|
| - | - | - | 106/185 | 1.00 ref          |                       | 36/185  | 1.00 ref           |                       | 70/185 | 1.00 ref         |       |
| + | - | - | 9/10    | 1.91 (0.68,5.39)  | 0.22                  | 1/10    | 0.69 (0.08,5.92)   | 0.73                  | 8/10   | 2.6 (0.84,8.05)  | 0.097 |
| - | + | - | 145/229 | 1.3 (0.91,1.85)   | 0.15                  | 66/229  | 1.73 (1.04,2.87)   | 0.035                 | 79/229 | 1.03 (0.67,1.57) | 0.89  |
| - | - | + | 239/196 | 2.51 (1.79,3.52)  | $9.3 \times 10^{-8}$  | 167/196 | 5.1 (3.23,8.06)    | $3.0 \times 10^{-12}$ | 72/196 | 1.11 (0.72,1.71) | 0.63  |
| + | + | - | 40/37   | 2.06 (1.11,3.81)  | 0.022                 | 17/37   | 2.98 (1.32,6.72)   | $8.7 \times 10^{-3}$  | 23/37  | 1.51 (0.72,3.15) | 0.27  |
| - | + | + | 414/237 | 3.5 (2.54,4.82)   | $1.9 \times 10^{-14}$ | 325/237 | 8.47 (5.44,13.19)  | $3.0 \times 10^{-21}$ | 89/237 | 1.05 (0.69,1.59) | 0.82  |
| + | - | + | 28/18   | 3.37 (1.6,7.13)   | $1.4 \times 10^{-3}$  | 21/18   | 7.88 (3.31,18.75)  | $3.0 \times 10^{-6}$  | 7/18   | 1.12 (0.4,3.12)  | 0.83  |
| + | + | + | 121/38  | 6.88 (4.04,11.73) | $1.3 \times 10^{-12}$ | 91/38   | 17.35 (9.13,32.94) | $2.8 \times 10^{-18}$ | 30/38  | 1.98 (0.98,4.01) | 0.058 |

## Softwood dust

|   |   |   |         |                  |                       |         |                   |                       |        |                  |      |
|---|---|---|---------|------------------|-----------------------|---------|-------------------|-----------------------|--------|------------------|------|
| - | - | - | 106/185 | 1.00 ref         |                       | 36/185  | 1.00 ref          |                       | 70/185 | 1.00 ref         |      |
| + | - | - | 11/17   | 1.35 (0.55,3.29) | 0.51                  | 2/17    | 0.36 (0.04,3.16)  | 0.36                  | 9/17   | 1.76 (0.67,4.59) | 0.25 |
| - | + | - | 145/229 | 1.32 (0.92,1.88) | 0.13                  | 66/229  | 1.78 (1.07,2.96)  | 0.027                 | 79/229 | 1.05 (0.69,1.61) | 0.82 |
| - | - | + | 239/196 | 2.49 (1.78,3.5)  | $1.2 \times 10^{-7}$  | 167/196 | 5.16 (3.26,8.17)  | $2.9 \times 10^{-12}$ | 72/196 | 1.11 (0.72,1.71) | 0.63 |
| + | + | - | 28/27   | 1.89 (0.97,3.67) | 0.060                 | 11/27   | 2.75 (1.15,6.57)  | 0.023                 | 17/27  | 1.36 (0.61,3.01) | 0.45 |
| - | + | + | 414/237 | 3.53 (2.56,4.87) | $1.4 \times 10^{-14}$ | 325/237 | 8.74 (5.6,13.65)  | $1.6 \times 10^{-21}$ | 89/237 | 1.06 (0.7,1.61)  | 0.79 |
| + | - | + | 23/16   | 2.82 (1.29,6.2)  | $9.7 \times 10^{-3}$  | 15/16   | 6.37 (2.53,16.05) | $8.5 \times 10^{-5}$  | 8/16   | 1.23 (0.43,3.46) | 0.70 |
| + | + | + | 73/32   | 4.52 (2.6,7.85)  | $9.0 \times 10^{-8}$  | 53/32   | 11.78 (6.23,12)   | $7.4 \times 10^{-13}$ | 20/32  | 1.59 (0.77,3.28) | 0.21 |

## Textile dust

|   |   |   |         |                  |                      |         |                  |                       |        |                  |      |
|---|---|---|---------|------------------|----------------------|---------|------------------|-----------------------|--------|------------------|------|
| - | - | - | 106/185 | 1.00 ref         |                      | 36/185  | 1.00 ref         |                       | 70/185 | 1.00 ref         |      |
| + | - | - | 13/18   | 0.81 (0.33,1.98) | 0.64                 | 2/18    | 0.28 (0.04,2.11) | 0.21                  | 11/18  | 1.08 (0.41,2.85) | 0.87 |
| - | + | - | 145/229 | 1.33 (0.93,1.91) | 0.12                 | 66/229  | 1.78 (1.06,2.97) | 0.028                 | 79/229 | 1.06 (0.69,1.63) | 0.79 |
| - | - | + | 239/196 | 2.55 (1.81,3.59) | $7.4 \times 10^{-8}$ | 167/196 | 5.32 (3.34,8.46) | $1.7 \times 10^{-12}$ | 72/196 | 1.13 (0.73,1.74) | 0.59 |

|                            |   |   |   |         |                   |                       |         |                     |                       |        |                  |       |
|----------------------------|---|---|---|---------|-------------------|-----------------------|---------|---------------------|-----------------------|--------|------------------|-------|
|                            | + | + | - | 20/21   | 1.47 (0.69,3.1)   | 0.31                  | 7/21    | 1.87 (0.65,5.33)    | 0.24                  | 13/21  | 1.21 (0.5,2.92)  | 0.67  |
|                            | - | + | + | 414/237 | 3.63 (2.63,5.02)  | 5.9×10 <sup>-15</sup> | 325/237 | 9.01 (5.75,14.12)   | 9.3×10 <sup>-22</sup> | 89/237 | 1.1 (0.73,1.68)  | 0.64  |
|                            | + | - | + | 16/11   | 1.74 (0.69,4.41)  | 0.24                  | 10/11   | 3.72 (1.24,11.18)   | 0.019                 | 6/11   | 0.9 (0.27,3.05)  | 0.87  |
|                            | + | + | + | 60/37   | 3.17 (1.84,5.47)  | 3.3×10 <sup>-5</sup>  | 48/37   | 8.62 (4.51,16.47)   | 7.5×10 <sup>-11</sup> | 12/37  | 0.82 (0.36,1.87) | 0.64  |
| Toluene                    |   |   |   |         |                   |                       |         |                     |                       |        |                  |       |
|                            | - | - | - | 106/185 | 1.00 ref          |                       | 36/185  | 1.00 ref            |                       | 70/185 | 1.00 ref         |       |
|                            | + | - | - | 2/3     | 1.16 (0.1,13.72)  | 0.91                  | 2/3     | 3.54 (0.29,43.65)   | 0.32                  | 0/3    | Not applicable   | NA    |
|                            | - | + | - | 145/229 | 1.33 (0.93,1.9)   | 0.12                  | 66/229  | 1.78 (1.06,2.96)    | 0.028                 | 79/229 | 1.04 (0.68,1.6)  | 0.85  |
|                            | - | - | + | 239/196 | 2.55 (1.82,3.59)  | 7.0×10 <sup>-8</sup>  | 167/196 | 5.22 (3.29,8.28)    | 2.4×10 <sup>-12</sup> | 72/196 | 1.13 (0.74,1.75) | 0.57  |
|                            | + | + | - | 15/5    | 3.89 (1.3,11.66)  | 0.015                 | 7/5     | 6.98 (1.9,25.65)    | 3.5×10 <sup>-3</sup>  | 8/5    | 2.77 (0.79,9.75) | 0.11  |
|                            | - | + | + | 414/237 | 3.59 (2.6,4.96)   | 9.5×10 <sup>-15</sup> | 325/237 | 8.86 (5.66,13.86)   | 1.4×10 <sup>-21</sup> | 89/237 | 1.07 (0.71,1.63) | 0.74  |
|                            | + | - | + | 11/6    | 2.61 (0.83,8.23)  | 0.10                  | 8/6     | 6.03 (1.71,21.28)   | 5.2×10 <sup>-3</sup>  | 3/6    | 0.95 (0.16,5.72) | 0.96  |
|                            | + | + | + | 29/9    | 5.37 (2.25,12.84) | 1.6×10 <sup>-4</sup>  | 21/9    | 13.73 (5.17,36.47)  | 1.5×10 <sup>-7</sup>  | 8/9    | 1.75 (0.54,5.69) | 0.35  |
| Welding fume               |   |   |   |         |                   |                       |         |                     |                       |        |                  |       |
|                            | - | - | - | 106/185 | 1.00 ref          |                       | 36/185  | 1.00 ref            |                       | 70/185 | 1.00 ref         |       |
|                            | + | - | - | 5/5     | 2.12 (0.57,7.85)  | 0.26                  | 1/5     | 1.47 (0.16,13.42)   | 0.73                  | 4/5    | 2.15 (0.51,9.05) | 0.29  |
|                            | - | + | - | 145/229 | 1.34 (0.93,1.91)  | 0.11                  | 66/229  | 1.81 (1.08,3.02)    | 0.023                 | 79/229 | 1.06 (0.69,1.62) | 0.79  |
|                            | - | - | + | 239/196 | 2.52 (1.8,3.55)   | 9.2×10 <sup>-8</sup>  | 167/196 | 5.23 (3.29,8.29)    | 2.3×10 <sup>-12</sup> | 72/196 | 1.14 (0.74,1.76) | 0.55  |
|                            | + | + | - | 17/24   | 1.33 (0.61,2.94)  | 0.47                  | 5/24    | 1.32 (0.39,4.45)    | 0.66                  | 12/24  | 1.15 (0.46,2.84) | 0.77  |
|                            | - | + | + | 414/237 | 3.58 (2.59,4.94)  | 9.2×10 <sup>-15</sup> | 325/237 | 8.87 (5.67,13.88)   | 1.2×10 <sup>-21</sup> | 89/237 | 1.09 (0.72,1.66) | 0.68  |
|                            | + | - | + | 13/7    | 4.08 (1.41,11.85) | 9.7×10 <sup>-3</sup>  | 9/7     | 8.98 (2.7,29.85)    | 3.4×10 <sup>-4</sup>  | 4/7    | 1.87 (0.47,7.41) | 0.37  |
|                            | + | + | + | 60/18   | 6.32 (3.27,12.23) | 4.2×10 <sup>-8</sup>  | 49/18   | 18.02 (8.42,38.55)  | 9.3×10 <sup>-14</sup> | 11/18  | 1.2 (0.45,3.21)  | 0.72  |
| Volatile sulphur compounds |   |   |   |         |                   |                       |         |                     |                       |        |                  |       |
|                            | - | - | - | 106/185 | 1.00 ref          |                       | 36/185  | 1.00 ref            |                       | 70/185 | 1.00 ref         |       |
|                            | + | - | - | 14/23   | 0.96 (0.43,2.15)  | 0.92                  | 4/23    | 0.83 (0.22,3.14)    | 0.78                  | 10/23  | 0.96 (0.39,2.38) | 0.94  |
|                            | - | + | - | 145/229 | 1.31 (0.92,1.87)  | 0.14                  | 66/229  | 1.73 (1.04,2.89)    | 0.035                 | 79/229 | 1.04 (0.68,1.59) | 0.85  |
|                            | - | - | + | 239/196 | 2.52 (1.8,3.54)   | 9.1×10 <sup>-8</sup>  | 167/196 | 5.23 (3.3,8.3)      | 2.1×10 <sup>-12</sup> | 72/196 | 1.11 (0.72,1.71) | 0.64  |
|                            | + | + | - | 24/29   | 1.05 (0.52,2.12)  | 0.88                  | 9/29    | 0.97 (0.34,2.78)    | 0.96                  | 15/29  | 0.93 (0.41,2.11) | 0.87  |
|                            | - | + | + | 414/237 | 3.52 (2.55,4.86)  | 1.8×10 <sup>-14</sup> | 325/237 | 8.76 (5.6,13.69)    | 1.7×10 <sup>-21</sup> | 89/237 | 1.05 (0.69,1.59) | 0.82  |
|                            | + | - | + | 24/24   | 1.54 (0.75,3.13)  | 0.24                  | 14/24   | 2.15 (0.85,5.42)    | 0.11                  | 10/24  | 1.08 (0.45,2.61) | 0.86  |
|                            | + | + | + | 94/18   | 9.22 (4.98,17.07) | 1.5×10 <sup>-12</sup> | 74/18   | 25.89 (12.71,52.74) | 3.1×10 <sup>-19</sup> | 20/18  | 2.24 (0.98,5.09) | 0.055 |

**Other agents in correlation with any of the sixteen independent particules**

Wood dust

|                                              |   |   |         |                   |                       |         |                    |                       |        |                  |      |
|----------------------------------------------|---|---|---------|-------------------|-----------------------|---------|--------------------|-----------------------|--------|------------------|------|
| -                                            | - | - | 106/185 | 1.00 ref          |                       | 36/185  | 1.00 ref           |                       | 70/185 | 1.00 ref         |      |
| +                                            | - | - | 11/17   | 1.35 (0.55,3.29)  | 0.51                  | 2/17    | 0.36 (0.04,3.16)   | 0.36                  | 9/17   | 1.76 (0.67,4.59) | 0.25 |
| -                                            | + | - | 145/229 | 1.32 (0.92,1.88)  | 0.13                  | 66/229  | 1.78 (1.07,2.96)   | 0.027                 | 79/229 | 1.05 (0.69,1.61) | 0.82 |
| -                                            | - | + | 239/196 | 2.49 (1.78,3.5)   | $1.2 \times 10^{-7}$  | 167/196 | 5.16 (3.26,8.17)   | $2.9 \times 10^{-12}$ | 72/196 | 1.11 (0.72,1.71) | 0.63 |
| +                                            | + | - | 28/27   | 1.89 (0.97,3.67)  | 0.060                 | 11/27   | 2.75 (1.15,6.57)   | 0.023                 | 17/27  | 1.36 (0.61,3.01) | 0.45 |
| -                                            | + | + | 414/237 | 3.53 (2.56,4.87)  | $1.4 \times 10^{-14}$ | 325/237 | 8.74 (5.6,13.65)   | $1.6 \times 10^{-21}$ | 89/237 | 1.06 (0.7,1.61)  | 0.79 |
| +                                            | - | + | 23/16   | 2.82 (1.29,6.2)   | $9.7 \times 10^{-3}$  | 15/16   | 6.37 (2.53,16.05)  | $8.5 \times 10^{-5}$  | 8/16   | 1.23 (0.43,3.46) | 0.70 |
| +                                            | + | + | 73/32   | 4.52 (2.6,7.85)   | $9.0 \times 10^{-8}$  | 53/32   | 11.78 (6.23,12)    | $7.4 \times 10^{-13}$ | 20/32  | 1.59 (0.77,3.28) | 0.21 |
| Aliphatic and alicyclic hydrocarbon solvents |   |   |         |                   |                       |         |                    |                       |        |                  |      |
| -                                            | - | - | 106/185 | 1.00 ref          |                       | 36/185  | 1.00 ref           |                       | 70/185 | 1.00 ref         |      |
| +                                            | - | - | 3/3     | 1.34 (0.21,8.42)  | 0.76                  | 2/3     | 2.13 (0.2,22.19)   | 0.53                  | 1/3    | 0.75 (0.07,7.53) | 0.80 |
| -                                            | + | - | 145/229 | 1.32 (0.92,1.9)   | 0.12                  | 66/229  | 1.79 (1.07,2.99)   | 0.026                 | 79/229 | 1.05 (0.68,1.6)  | 0.84 |
| -                                            | - | + | 239/196 | 2.53 (1.8,3.56)   | $9.0 \times 10^{-8}$  | 167/196 | 5.26 (3.31,8.36)   | $2.2 \times 10^{-12}$ | 72/196 | 1.13 (0.73,1.73) | 0.59 |
| +                                            | + | - | 11/7    | 2.14 (0.75,6.16)  | 0.16                  | 5/7     | 3.26 (0.89,11.93)  | 0.074                 | 6/7    | 1.4 (0.39,5.03)  | 0.61 |
| -                                            | + | + | 414/237 | 3.58 (2.59,4.95)  | $1.1 \times 10^{-14}$ | 325/237 | 8.95 (5.71,14.04)  | $1.3 \times 10^{-21}$ | 89/237 | 1.08 (0.71,1.64) | 0.73 |
| +                                            | - | + | 9/8     | 1.84 (0.6,5.58)   | 0.28                  | 6/8     | 3.15 (0.82,12.12)  | 0.096                 | 3/8    | 1.2 (0.27,5.27)  | 0.81 |
| +                                            | + | + | 34/11   | 5.77 (2.47,13.47) | $5.0 \times 10^{-5}$  | 24/11   | 14.05 (5.38,36.69) | $6.7 \times 10^{-8}$  | 10/11  | 2.38 (0.8,7.03)  | 0.12 |
| Animal dust                                  |   |   |         |                   |                       |         |                    |                       |        |                  |      |
| -                                            | - | - | 106/185 | 1.00 ref          |                       | 36/185  | 1.00 ref           |                       | 70/185 | 1.00 ref         |      |
| +                                            | - | - | 11/22   | 0.81 (0.34,1.92)  | 0.63                  | 3/22    | 0.54 (0.11,2.59)   | 0.44                  | 8/22   | 0.81 (0.31,2.14) | 0.67 |
| -                                            | + | - | 145/229 | 1.31 (0.91,1.87)  | 0.14                  | 66/229  | 1.74 (1.04,2.9)    | 0.034                 | 79/229 | 1.03 (0.67,1.58) | 0.89 |
| -                                            | - | + | 239/196 | 2.53 (1.8,3.55)   | $8.6 \times 10^{-8}$  | 167/196 | 5.21 (3.29,8.27)   | $2.3 \times 10^{-12}$ | 72/196 | 1.11 (0.72,1.71) | 0.64 |
| +                                            | + | - | 20/20   | 1.24 (0.57,2.71)  | 0.59                  | 7/20    | 1.35 (0.44,4.17)   | 0.60                  | 13/20  | 1.03 (0.41,2.59) | 0.95 |
| -                                            | + | + | 414/237 | 3.52 (2.55,4.86)  | $1.8 \times 10^{-14}$ | 325/237 | 8.72 (5.57,13.63)  | $2.3 \times 10^{-21}$ | 89/237 | 1.05 (0.69,1.59) | 0.82 |
| +                                            | - | + | 22/23   | 1.58 (0.76,3.29)  | 0.22                  | 12/23   | 2.06 (0.79,5.37)   | 0.14                  | 10/23  | 1.22 (0.5,2.99)  | 0.66 |
| +                                            | + | + | 65/23   | 6.19 (3.35,11.44) | $6.2 \times 10^{-9}$  | 51/23   | 15.79 (7.77,32.1)  | $2.5 \times 10^{-14}$ | 14/23  | 1.78 (0.76,4.19) | 0.19 |
| Aromatic hydrocarbon solvents                |   |   |         |                   |                       |         |                    |                       |        |                  |      |
| -                                            | - | - | 106/185 | 1.00 ref          |                       | 36/185  | 1.00 ref           |                       | 70/185 | 1.00 ref         |      |
| +                                            | - | - | 2/3     | 1.15 (0.1,13.64)  | 0.91                  | 2/3     | 3.5 (0.28,43.1)    | 0.33                  | 0/3    | Not applicable   | NA   |
| -                                            | + | - | 145/229 | 1.33 (0.93,1.9)   | 0.12                  | 66/229  | 1.78 (1.07,2.97)   | 0.027                 | 79/229 | 1.04 (0.68,1.6)  | 0.85 |
| -                                            | - | + | 239/196 | 2.54 (1.81,3.58)  | $7.7 \times 10^{-8}$  | 167/196 | 5.23 (3.29,8.3)    | $2.3 \times 10^{-12}$ | 72/196 | 1.13 (0.74,1.75) | 0.57 |
| +                                            | + | - | 16/8    | 2.57 (1.6,5.9)    | 0.050                 | 8/8     | 4.82 (1.54,15.06)  | $6.8 \times 10^{-3}$  | 8/8    | 1.6 (0.52,4.93)  | 0.42 |
| -                                            | + | + | 414/237 | 3.58 (2.59,4.95)  | $1.0 \times 10^{-14}$ | 325/237 | 8.88 (5.68,13.91)  | $1.3 \times 10^{-21}$ | 89/237 | 1.07 (0.7,1.62)  | 0.75 |

|                       |   |   |   |         |                   |                       |         |                    |                       |        |                  |       |
|-----------------------|---|---|---|---------|-------------------|-----------------------|---------|--------------------|-----------------------|--------|------------------|-------|
|                       | + | - | + | 11/7    | 2.33 (0.77,6.99)  | 0.13                  | 8/7     | 5.45 (1.61,18.4)   | 6.4×10 <sup>-3</sup>  | 3/7    | 0.85 (0.15,4.86) | 0.86  |
|                       | + | + | + | 35/11   | 5.67 (2.48,12.97) | 3.9×10 <sup>-5</sup>  | 24/11   | 13.53 (5.28,34.72) | 6.0×10 <sup>-8</sup>  | 11/11  | 2.26 (0.78,6.51) | 0.13  |
| Benzo(a)pyrene        |   |   |   |         |                   |                       |         |                    |                       |        |                  |       |
|                       | - | - | - | 106/185 | 1.00 ref          |                       | 36/185  | 1.00 ref           |                       | 70/185 | 1.00 ref         |       |
|                       | + | - | - | 14/19   | 1.26 (0.56,2.83)  | 0.57                  | 7/19    | 1.83 (0.63,5.36)   | 0.27                  | 7/19   | 0.9 (0.33,2.45)  | 0.84  |
|                       | - | + | - | 145/229 | 1.32 (0.93,1.89)  | 0.12                  | 66/229  | 1.75 (1.05,2.91)   | 0.032                 | 79/229 | 1.06 (0.69,1.61) | 0.80  |
|                       | - | - | + | 239/196 | 2.5 (1.78,3.51)   | 1.1×10 <sup>-7</sup>  | 167/196 | 5.16 (3.26,8.17)   | 2.6×10 <sup>-12</sup> | 72/196 | 1.12 (0.73,1.73) | 0.60  |
|                       | + | + | - | 44/49   | 1.46 (0.83,2.57)  | 0.19                  | 13/49   | 1.62 (0.72,3.61)   | 0.24                  | 31/49  | 1.26 (0.64,2.46) | 0.51  |
|                       | - | + | + | 414/237 | 3.51 (2.55,4.84)  | 1.7×10 <sup>-14</sup> | 325/237 | 8.5 (5.45,13.25)   | 3.3×10 <sup>-21</sup> | 89/237 | 1.07 (0.7,1.62)  | 0.76  |
|                       | + | - | + | 27/22   | 2.69 (1.33,5.43)  | 5.8×10 <sup>-3</sup>  | 22/22   | 6.98 (3.12,15.63)  | 2.3×10 <sup>-6</sup>  | 5/22   | 0.58 (0.19,1.76) | 0.34  |
|                       | + | + | + | 144/56  | 4.49 (2.83,7.13)  | 1.8×10 <sup>-10</sup> | 112/56  | 10.86 (6.14,19.19) | 2.3×10 <sup>-16</sup> | 32/56  | 1.33 (0.71,2.46) | 0.37  |
| Chromium              |   |   |   |         |                   |                       |         |                    |                       |        |                  |       |
|                       | - | - | - | 106/185 | 1.00 ref          |                       | 36/185  | 1.00 ref           |                       | 70/185 | 1.00 ref         |       |
|                       | + | - | - | 0/12    | Not applicable    | NA                    | 0/12    | Not applicable     | NA                    | 0/12   | Not applicable   | NA    |
|                       | - | + | - | 145/229 | 1.32 (0.92,1.89)  | 0.13                  | 66/229  | 1.77 (1.06,2.96)   | 0.028                 | 79/229 | 1.05 (0.68,1.6)  | 0.84  |
|                       | - | - | + | 239/196 | 2.5 (1.78,3.51)   | 1.3×10 <sup>-7</sup>  | 167/196 | 5.15 (3.24,8.16)   | 3.4×10 <sup>-12</sup> | 72/196 | 1.12 (0.73,1.73) | 0.60  |
|                       | + | + | - | 13/17   | 1.58 (0.65,3.84)  | 0.31                  | 5/17    | 2.69 (0.85,8.54)   | 0.094                 | 8/17   | 1.03 (0.34,3.13) | 0.96  |
|                       | - | + | + | 414/237 | 3.57 (2.58,4.93)  | 1.2×10 <sup>-14</sup> | 325/237 | 8.83 (5.64,13.81)  | 1.4×10 <sup>-21</sup> | 89/237 | 1.08 (0.71,1.64) | 0.73  |
|                       | + | - | + | 10/6    | 3.61 (1.11,11.8)  | 0.033                 | 9/6     | 10.12 (2.8,36.49)  | 4.1×10 <sup>-4</sup>  | 1/6    | 0.41 (0.04,3.78) | 0.43  |
|                       | + | + | + | 39/10   | 6.43 (2.91,14.22) | 4.4×10 <sup>-6</sup>  | 29/10   | 16.56 (6.89,39.76) | 3.4×10 <sup>-10</sup> | 10/10  | 1.93 (0.63,5.9)  | 0.25  |
| Diesel engine exhaust |   |   |   |         |                   |                       |         |                    |                       |        |                  |       |
|                       | - | - | - | 106/185 | 1.00 ref          |                       | 36/185  | 1.00 ref           |                       | 70/185 | 1.00 ref         |       |
|                       | + | - | - | 9/23    | 0.77 (0.31,1.92)  | 0.57                  | 1/23    | 0.33 (0.04,2.6)    | 0.29                  | 8/23   | 0.88 (0.33,2.36) | 0.80  |
|                       | - | + | - | 145/229 | 1.32 (0.93,1.89)  | 0.12                  | 66/229  | 1.75 (1.05,2.92)   | 0.031                 | 79/229 | 1.07 (0.7,1.63)  | 0.75  |
|                       | - | - | + | 239/196 | 2.49 (1.77,3.49)  | 1.3×10 <sup>-7</sup>  | 167/196 | 5.17 (3.26,8.18)   | 2.6×10 <sup>-12</sup> | 72/196 | 1.12 (0.73,1.72) | 0.59  |
|                       | + | + | - | 50/45   | 2.21 (1.27,3.84)  | 4.8×10 <sup>-3</sup>  | 20/45   | 2.86 (1.35,6.03)   | 5.8×10 <sup>-3</sup>  | 30/45  | 1.69 (0.89,3.2)  | 0.11  |
|                       | - | + | + | 414/237 | 3.51 (2.54,4.84)  | 1.9×10 <sup>-14</sup> | 325/237 | 8.65 (5.54,13.5)   | 2.2×10 <sup>-21</sup> | 89/237 | 1.06 (0.7,1.61)  | 0.77  |
|                       | + | - | + | 38/28   | 2.32 (1.26,4.24)  | 6.6×10 <sup>-3</sup>  | 29/28   | 6.07 (2.99,12.33)  | 5.9×10 <sup>-7</sup>  | 9/28   | 0.63 (0.24,1.61) | 0.33  |
|                       | + | + | + | 155/46  | 6.44 (3.98,10.43) | 3.7×10 <sup>-14</sup> | 120/46  | 16.44 (9.09,29.72) | 2.0×10 <sup>-20</sup> | 35/46  | 1.95 (1.05,3.6)  | 0.034 |
| Hardwood dust         |   |   |   |         |                   |                       |         |                    |                       |        |                  |       |
|                       | - | - | - | 106/185 | 1.00 ref          |                       | 36/185  | 1.00 ref           |                       | 70/185 | 1.00 ref         |       |
|                       | + | - | - | 11/17   | 1.34 (0.55,3.27)  | 0.52                  | 2/17    | 0.36 (0.04,3.13)   | 0.35                  | 9/17   | 1.76 (0.67,4.59) | 0.25  |

|              |   |   |   |         |                    |                       |         |                       |                       |        |                    |       |
|--------------|---|---|---|---------|--------------------|-----------------------|---------|-----------------------|-----------------------|--------|--------------------|-------|
|              | - | + | - | 145/229 | 1.32 (0.92,1.88)   | 0.13                  | 66/229  | 1.78 (1.07,2.96)      | 0.027                 | 79/229 | 1.05 (0.69,1.61)   | 0.82  |
|              | - | - | + | 239/196 | 2.49 (1.78,3.5)    | 1.2×10 <sup>-7</sup>  | 167/196 | 5.16 (3.26,8.18)      | 2.9×10 <sup>-12</sup> | 72/196 | 1.11 (0.72,1.71)   | 0.63  |
|              | + | + | - | 28/27   | 1.88 (0.97,3.65)   | 0.063                 | 11/27   | 2.73 (1.14,6.51)      | 0.024                 | 17/27  | 1.36 (0.61,3.01)   | 0.45  |
|              | - | + | + | 414/237 | 3.53 (2.56,4.87)   | 1.4×10 <sup>-14</sup> | 325/237 | 8.73 (5.59,13.64)     | 1.7×10 <sup>-21</sup> | 89/237 | 1.06 (0.7,1.61)    | 0.79  |
|              | + | - | + | 23/16   | 2.81 (1.28,6.17)   | 0.010                 | 15/16   | 6.31 (2.51,15.91)     | 9.3×10 <sup>-5</sup>  | 8/16   | 1.23 (0.43,3.46)   | 0.70  |
|              | + | + | + | 72/32   | 4.42 (2.54,7.71)   | 1.5×10 <sup>-7</sup>  | 52/32   | 11.43 (5.8,22.52)     | 1.9×10 <sup>-12</sup> | 20/32  | 1.59 (0.77,3.28)   | 0.21  |
| Herbicides   |   |   |   |         |                    |                       |         |                       |                       |        |                    |       |
|              | - | - | - | 106/185 | 1.00 ref           |                       | 36/185  | 1.00 ref              |                       | 70/185 | 1.00 ref           |       |
|              | + | - | - | 9/18    | 0.8 (0.3,2.11)     | 0.65                  | 2/18    | 0.36 (0.04,3.08)      | 0.35                  | 7/18   | 0.83 (0.29,2.38)   | 0.72  |
|              | - | + | - | 145/229 | 1.32 (0.92,1.89)   | 0.13                  | 66/229  | 1.8 (1.07,3)          | 0.025                 | 79/229 | 1.03 (0.68,1.58)   | 0.88  |
|              | - | - | + | 239/196 | 2.52 (1.79,3.54)   | 1.0×10 <sup>-7</sup>  | 167/196 | 5.25 (3.3,8.34)       | 2.3×10 <sup>-12</sup> | 72/196 | 1.1 (0.71,1.7)     | 0.66  |
|              | + | + | - | 9/13    | 0.85 (0.29,2.52)   | 0.77                  | 4/13    | 0.85 (0.16,4.54)      | 0.85                  | 5/13   | 0.73 (0.21,2.57)   | 0.62  |
|              | - | + | + | 414/237 | 3.54 (2.57,4.89)   | 1.5×10 <sup>-14</sup> | 325/237 | 8.91 (5.69,13.96)     | 1.3×10 <sup>-21</sup> | 89/237 | 1.06 (0.7,1.6)     | 0.80  |
|              | + | - | + | 10/14   | 1.02 (0.35,2.96)   | 0.97                  | 4/14    | 0.43 (0.05,3.68)      | 0.44                  | 6/14   | 1.11 (0.35,3.51)   | 0.86  |
|              | + | + | + | 37/14   | 5.8 (2.78,12.1)    | 2.9×10 <sup>-6</sup>  | 29/14   | 16.56 (7.2,38.11)     | 4.1×10 <sup>-11</sup> | 8/14   | 1.46 (0.5,4.3)     | 0.49  |
| Insecticides |   |   |   |         |                    |                       |         |                       |                       |        |                    |       |
|              | - | - | - | 106/185 | 1.00 ref           |                       | 36/185  | 1.00 ref              |                       | 70/185 | 1.00 ref           |       |
|              | + | - | - | 4/7     | 0.9 (0.2,3.95)     | 0.88                  | 1/7     | Not applicable        | NA                    | 3/7    | 1.36 (0.29,6.28)   | 0.69  |
|              | - | + | - | 145/229 | 1.31 (0.91,1.87)   | 0.14                  | 66/229  | 1.75 (1.05,2.92)      | 0.032                 | 79/229 | 1.04 (0.68,1.59)   | 0.87  |
|              | - | - | + | 239/196 | 2.52 (1.79,3.54)   | 1.0×10 <sup>-7</sup>  | 167/196 | 5.16 (3.25,8.18)      | 3.3×10 <sup>-12</sup> | 72/196 | 1.12 (0.73,1.73)   | 0.61  |
|              | + | + | - | 7/8     | 1.09 (0.33,3.65)   | 0.88                  | 3/8     | 0.8 (0.09,6.89)       | 0.84                  | 4/8    | 1.35 (0.37,5.01)   | 0.65  |
|              | - | + | + | 414/237 | 3.53 (2.56,4.88)   | 1.9×10 <sup>-14</sup> | 325/237 | 8.7 (5.56,13.61)      | 2.7×10 <sup>-21</sup> | 89/237 | 1.07 (0.7,1.62)    | 0.77  |
|              | + | - | + | 9/3     | 5.62 (1.36,23.32)  | 0.017                 | 8/3     | 14.25 (3.16,64.26)    | 5.5×10 <sup>-4</sup>  | 1/3    | 0.73 (0.06,8.45)   | 0.80  |
|              | + | + | + | 24/1    | 47.9 (6.22,368.86) | 2.0×10 <sup>-4</sup>  | 19/1    | 133.7 (16.28,1097.75) | 5.2×10 <sup>-6</sup>  | 5/1    | 23.65 (1.8,310.98) | 0.016 |
| Iron         |   |   |   |         |                    |                       |         |                       |                       |        |                    |       |
|              | - | - | - | 106/185 | 1.00 ref           |                       | 36/185  | 1.00 ref              |                       | 70/185 | 1.00 ref           |       |
|              | + | - | - | 22/26   | 1.53 (0.77,3.03)   | 0.22                  | 8/26    | 1.52 (0.56,4.1)       | 0.41                  | 14/26  | 1.46 (0.67,3.2)    | 0.35  |
|              | - | + | - | 145/229 | 1.34 (0.94,1.91)   | 0.11                  | 66/229  | 1.75 (1.06,2.91)      | 0.030                 | 79/229 | 1.08 (0.71,1.65)   | 0.72  |
|              | - | - | + | 239/196 | 2.51 (1.79,3.52)   | 9.5×10 <sup>-8</sup>  | 167/196 | 5.14 (3.25,8.11)      | 2.3×10 <sup>-12</sup> | 72/196 | 1.16 (0.76,1.79)   | 0.49  |
|              | + | + | - | 64/70   | 1.62 (0.98,2.67)   | 0.059                 | 20/70   | 1.78 (0.88,3.61)      | 0.11                  | 44/70  | 1.41 (0.78,2.56)   | 0.25  |
|              | - | + | + | 414/237 | 3.55 (2.57,4.88)   | 9.7×10 <sup>-15</sup> | 325/237 | 8.52 (5.48,13.25)     | 1.8×10 <sup>-21</sup> | 89/237 | 1.1 (0.72,1.66)    | 0.66  |
|              | + | - | + | 48/33   | 2.89 (1.62,5.16)   | 3.4×10 <sup>-4</sup>  | 38/33   | 6.88 (3.48,13.6)      | 3.0×10 <sup>-8</sup>  | 10/33  | 0.83 (0.35,1.93)   | 0.66  |

|                                  |   |   |   |         |                   |                       |         |                    |                       |        |                  |       |
|----------------------------------|---|---|---|---------|-------------------|-----------------------|---------|--------------------|-----------------------|--------|------------------|-------|
|                                  | + | + | + | 223/69  | 5.78 (3.76,8.87)  | $1.2 \times 10^{-15}$ | 173/69  | 13.79 (8.05,23.62) | $1.2 \times 10^{-21}$ | 50/69  | 1.68 (0.96,2.93) | 0.067 |
| Manmade mineral fibres           |   |   |   |         |                   |                       |         |                    |                       |        |                  |       |
|                                  | - | - | - | 106/185 | 1.00 ref          |                       | 36/185  | 1.00 ref           |                       | 70/185 | 1.00 ref         |       |
|                                  | + | - | - | 4/6     | 1.58 (0.38,6.56)  | 0.53                  | 0/6     | Not applicable     | NA                    | 4/6    | 2.04 (0.46,8.98) | 0.35  |
|                                  | - | + | - | 145/229 | 1.31 (0.92,1.87)  | 0.14                  | 66/229  | 1.75 (1.05,2.9)    | 0.032                 | 79/229 | 1.04 (0.68,1.59) | 0.86  |
|                                  | - | - | + | 239/196 | 2.52 (1.79,3.53)  | $9.1 \times 10^{-8}$  | 167/196 | 5.12 (3.24,8.1)    | $2.8 \times 10^{-12}$ | 72/196 | 1.12 (0.73,1.73) | 0.60  |
|                                  | + | + | - | 27/24   | 1.96 (0.96,4)     | 0.064                 | 13/24   | 3.64 (1.48,8.95)   | $4.9 \times 10^{-3}$  | 14/24  | 1.18 (0.49,2.86) | 0.71  |
|                                  | - | + | + | 414/237 | 3.52 (2.55,4.85)  | $1.7 \times 10^{-14}$ | 325/237 | 8.55 (5.49,13.33)  | $2.6 \times 10^{-21}$ | 89/237 | 1.06 (0.7,1.61)  | 0.78  |
|                                  | + | - | + | 18/15   | 2.58 (1.11,5.99)  | 0.028                 | 13/15   | 6.21 (2.34,16.44)  | $2.4 \times 10^{-4}$  | 5/15   | 0.87 (0.27,2.81) | 0.82  |
|                                  | + | + | + | 66/26   | 5.2 (2.81,9.62)   | $1.4 \times 10^{-7}$  | 48/26   | 13.29 (6.41,27.57) | $3.6 \times 10^{-12}$ | 18/26  | 1.64 (0.73,3.69) | 0.24  |
| Other organic solvents           |   |   |   |         |                   |                       |         |                    |                       |        |                  |       |
|                                  | - | - | - | 106/185 | 1.00 ref          |                       | 36/185  | 1.00 ref           |                       | 70/185 | 1.00 ref         |       |
|                                  | + | - | - | 3/3     | 1.34 (0.21,8.42)  | 0.76                  | 2/3     | 2.13 (0.22,2.19)   | 0.53                  | 1/3    | 0.75 (0.07,7.53) | 0.80  |
|                                  | - | + | - | 145/229 | 1.32 (0.92,1.9)   | 0.12                  | 66/229  | 1.79 (1.07,2.99)   | 0.026                 | 79/229 | 1.05 (0.68,1.6)  | 0.84  |
|                                  | - | - | + | 239/196 | 2.53 (1.8,3.56)   | $9.0 \times 10^{-8}$  | 167/196 | 5.26 (3.31,8.36)   | $2.2 \times 10^{-12}$ | 72/196 | 1.13 (0.73,1.73) | 0.59  |
|                                  | + | + | - | 11/7    | 2.14 (0.75,6.16)  | 0.16                  | 5/7     | 3.26 (0.89,11.93)  | 0.074                 | 6/7    | 1.4 (0.39,5.03)  | 0.61  |
|                                  | - | + | + | 414/237 | 3.58 (2.59,4.95)  | $1.1 \times 10^{-14}$ | 325/237 | 8.95 (5.71,14.04)  | $1.3 \times 10^{-21}$ | 89/237 | 1.08 (0.71,1.64) | 0.73  |
|                                  | + | - | + | 9/8     | 1.84 (0.6,5.58)   | 0.28                  | 6/8     | 3.15 (0.82,12.12)  | 0.096                 | 3/8    | 1.2 (0.27,5.27)  | 0.81  |
|                                  | + | + | + | 34/11   | 5.77 (2.47,13.47) | $5.0 \times 10^{-5}$  | 24/11   | 14.05 (5.38,36.69) | $6.7 \times 10^{-8}$  | 10/11  | 2.38 (0.8,7.03)  | 0.12  |
| Plant dust                       |   |   |   |         |                   |                       |         |                    |                       |        |                  |       |
|                                  | - | - | - | 106/185 | 1.00 ref          |                       | 36/185  | 1.00 ref           |                       | 70/185 | 1.00 ref         |       |
|                                  | + | - | - | 12/22   | 0.89 (0.38,2.08)  | 0.79                  | 3/22    | 0.59 (0.12,2.85)   | 0.51                  | 9/22   | 0.87 (0.34,2.23) | 0.78  |
|                                  | - | + | - | 145/229 | 1.31 (0.92,1.88)  | 0.14                  | 66/229  | 1.75 (1.05,2.92)   | 0.032                 | 79/229 | 1.04 (0.68,1.59) | 0.86  |
|                                  | - | - | + | 239/196 | 2.53 (1.8,3.55)   | $9.0 \times 10^{-8}$  | 167/196 | 5.25 (3.31,8.34)   | $2.1 \times 10^{-12}$ | 72/196 | 1.1 (0.72,1.7)   | 0.66  |
|                                  | + | + | - | 20/27   | 1.03 (0.5,2.14)   | 0.94                  | 7/27    | 0.93 (0.31,2.8)    | 0.90                  | 13/27  | 0.96 (0.41,2.24) | 0.92  |
|                                  | - | + | + | 414/237 | 3.54 (2.56,4.88)  | $1.6 \times 10^{-14}$ | 325/237 | 8.85 (5.65,13.85)  | $1.5 \times 10^{-21}$ | 89/237 | 1.05 (0.69,1.6)  | 0.81  |
|                                  | + | - | + | 20/23   | 1.24 (0.58,2.63)  | 0.58                  | 10/23   | 1.48 (0.53,4.11)   | 0.45                  | 10/23  | 0.97 (0.39,2.41) | 0.95  |
|                                  | + | + | + | 73/21   | 7.11 (3.84,13.18) | $4.7 \times 10^{-10}$ | 59/21   | 20.4 (9.99,41.69)  | $1.3 \times 10^{-16}$ | 14/21  | 1.73 (0.72,4.17) | 0.22  |
| Polycyclic aromatic hydrocarbons |   |   |   |         |                   |                       |         |                    |                       |        |                  |       |
|                                  | - | - | - | 106/185 | 1.00 ref          |                       | 36/185  | 1.00 ref           |                       | 70/185 | 1.00 ref         |       |
|                                  | + | - | - | 14/25   | 0.96 (0.44,2.1)   | 0.93                  | 7/25    | 1.34 (0.47,3.83)   | 0.59                  | 7/25   | 0.7 (0.27,1.85)  | 0.47  |
|                                  | - | + | - | 145/229 | 1.32 (0.93,1.89)  | 0.12                  | 66/229  | 1.73 (1.04,2.86)   | 0.035                 | 79/229 | 1.06 (0.69,1.62) | 0.79  |
|                                  | - | - | + | 239/196 | 2.49 (1.78,3.49)  | $1.2 \times 10^{-7}$  | 167/196 | 5.08 (3.22,8.03)   | $3.1 \times 10^{-12}$ | 72/196 | 1.14 (0.74,1.75) | 0.56  |



|                    |   |   |   |         |                  |                       |         |                    |                       |        |                  |                      |
|--------------------|---|---|---|---------|------------------|-----------------------|---------|--------------------|-----------------------|--------|------------------|----------------------|
|                    | + | + | - | 50/53   | 1.56 (0.91,2.67) | 0.11                  | 14/53   | 1.63 (0.75,3.55)   | 0.21                  | 36/53  | 1.39 (0.73,2.64) | 0.31                 |
|                    | - | + | + | 414/237 | 3.5 (2.54,4.83)  | $1.7 \times 10^{-14}$ | 325/237 | 8.41 (5.41,13.06)  | $3.0 \times 10^{-21}$ | 89/237 | 1.07 (0.71,1.62) | 0.75                 |
|                    | + | - | + | 32/26   | 2.58 (1.33,4.99) | $5.0 \times 10^{-3}$  | 26/26   | 6.43 (3,13.79)     | $1.7 \times 10^{-6}$  | 6/26   | 0.58 (0.21,1.62) | 0.30                 |
|                    | + | + | + | 173/59  | 5.09 (3.25,7.97) | $1.1 \times 10^{-12}$ | 134/59  | 12.27 (7.04,21.36) | $8.2 \times 10^{-19}$ | 39/59  | 1.49 (0.83,2.69) | 0.18                 |
| Stone and concrete |   |   |   |         |                  |                       |         |                    |                       |        |                  |                      |
|                    | - | - | - | 106/185 | 1.00 ref         |                       | 36/185  | 1.00 ref           |                       | 70/185 | 1.00 ref         |                      |
|                    | + | - | - | 17/32   | 1.02 (0.5,2.11)  | 0.95                  | 2/32    | 0.44 (0.1,1.99)    | 0.29                  | 15/32  | 1.29 (0.59,2.82) | 0.52                 |
|                    | - | + | - | 145/229 | 1.31 (0.92,1.87) | 0.14                  | 66/229  | 1.72 (1.04,2.86)   | 0.036                 | 79/229 | 1.06 (0.69,1.61) | 0.80                 |
|                    | - | - | + | 239/196 | 2.49 (1.78,3.49) | $1.2 \times 10^{-7}$  | 167/196 | 5.12 (3.24,8.09)   | $2.7 \times 10^{-12}$ | 72/196 | 1.11 (0.72,1.7)  | 0.63                 |
|                    | + | + | - | 74/77   | 1.83 (1.13,2.96) | 0.014                 | 30/77   | 2.38 (1.23,4.62)   | 0.010                 | 44/77  | 1.4 (0.8,2.46)   | 0.24                 |
|                    | - | + | + | 414/237 | 3.49 (2.53,4.81) | $2.0 \times 10^{-14}$ | 325/237 | 8.48 (5.45,13.2)   | $2.8 \times 10^{-21}$ | 89/237 | 1.06 (0.7,1.6)   | 0.79                 |
|                    | + | - | + | 57/42   | 2.4 (1.41,4.08)  | $1.3 \times 10^{-3}$  | 41/42   | 5.45 (2.85,10.42)  | $3.0 \times 10^{-7}$  | 16/42  | 0.88 (0.42,1.81) | 0.72                 |
|                    | + | + | + | 239/74  | 6.25 (4.07,9.6)  | $5.9 \times 10^{-17}$ | 178/74  | 14.97 (8.69,25.79) | $1.9 \times 10^{-22}$ | 61/74  | 2.12 (1.24,3.64) | $6.1 \times 10^{-3}$ |

**Supplementary Table 7. Additive interaction effects between occupational inhalable agents and genetic risk score on the development of RA.** Estimates were adjusted for age, sex, residential area, smoking, alcohol drinking, levels of education, body mass index and principal components 1-10. For the OR estimates that were not available due to limited number of cases within the subgroup, 'not applicable' was marked in corresponding cells.

| Occupational exposure                 | GRS | Overall RA                  |                   |                       | ACPA-positive subtype      |                    |                       | ACPA-negative subtype      |                  |                      |
|---------------------------------------|-----|-----------------------------|-------------------|-----------------------|----------------------------|--------------------|-----------------------|----------------------------|------------------|----------------------|
|                                       |     | N<br>(case / control)       | OR (95%CI)        | P                     | N<br>(case / control)      | OR (95%CI)         | P                     | N<br>(case / control)      | OR (95%CI)       | P                    |
| Exposed to any agents                 |     |                             |                   |                       |                            |                    |                       |                            |                  |                      |
| -                                     | -   | 240/460                     | 1.00 ref          |                       | 85/460                     | 1.00 ref           |                       | 155/460                    | 1.00 ref         |                      |
| +                                     | -   | 577/962                     | 1.08 (0.89, 1.31) | 0.43                  | 237/962                    | 1.31 (0.99, 1.74)  | 0.059                 | 340/962                    | 1.00 (0.79,1.25) | 0.99                 |
| -                                     | +   | 698/418                     | 3.09 (2.52, 3.79) | 2.0×10 <sup>-27</sup> | 531/418                    | 6.97 (5.29, 9.17)  | 1.5×10 <sup>-43</sup> | 167/418                    | 1.17 (0.90,1.53) | 0.23                 |
| +                                     | +   | 1921/998                    | 3.43 (2.86, 4.11) | 4.8×10 <sup>-40</sup> | 1418/998                   | 7.44 (5.75, 9.62)  | 7.0×10 <sup>-53</sup> | 503/998                    | 1.42 (1.14,1.77) | 1.7×10 <sup>-3</sup> |
|                                       |     | 0.07 (-0.07,0.22), p=0.33   |                   |                       | 0.02 (-0.14,0.18), p=0.79  |                    |                       | -0.21 (-0.54,0.11), p=0.2  |                  |                      |
| <b>The sixteen independent agents</b> |     |                             |                   |                       |                            |                    |                       |                            |                  |                      |
| Asbestos                              |     |                             |                   |                       |                            |                    |                       |                            |                  |                      |
| -                                     | -   | 240/460                     | 1.00 ref          |                       | 85/460                     | 1.00 ref           |                       | 155/460                    | 1.00 ref         |                      |
| +                                     | -   | 24/33                       | 1.25 (0.68, 2.27) | 0.47                  | 11/33                      | 2.05 (0.94, 4.49)  | 0.073                 | 13/33                      | 0.86 (0.41,1.81) | 0.70                 |
| -                                     | +   | 698/418                     | 3.09 (2.52, 3.80) | 7.7×10 <sup>-27</sup> | 531/418                    | 6.96 (5.27, 9.20)  | 2.4×10 <sup>-42</sup> | 167/418                    | 1.14 (0.87,1.49) | 0.33                 |
| +                                     | +   | 91/29                       | 5.85 (3.55, 9.67) | 5.1×10 <sup>-12</sup> | 63/29                      | 14.20 (7.91,25.49) | 6.1×10 <sup>-19</sup> | 28/29                      | 2.28 (1.23,4.23) | 8.6×10 <sup>-3</sup> |
|                                       |     | 0.43 ( 0.14,0.72), p=0.0037 |                   |                       | 0.44 (0.13,0.74), p=0.0055 |                    |                       | -1.12 (-2.42,0.18), p=0.09 |                  |                      |
| Cadmium                               |     |                             |                   |                       |                            |                    |                       |                            |                  |                      |
| -                                     | -   | 240/460                     | 1.00 ref          |                       | 85/460                     | 1.00 ref           |                       | 155/460                    | 1.00 ref         |                      |
| +                                     | -   | 3/9                         | 0.53 (0.14, 2.02) | 0.35                  | 3/9                        | 1.56 (0.40, 6.06)  | 0.52                  | 0/9                        | Not applicable   | NA                   |
| -                                     | +   | 698/418                     | 3.12 (2.54, 3.84) | 4.6×10 <sup>-27</sup> | 531/418                    | 7.06 (5.33, 9.35)  | 2.0×10 <sup>-42</sup> | 167/418                    | 1.15 (0.88,1.50) | 0.31                 |
| +                                     | +   | 24/8                        | 4.21 (1.78, 9.97) | 1.1×10 <sup>-3</sup>  | 17/8                       | 9.53 (3.74,24.27)  | 2.3×10 <sup>-6</sup>  | 7/8                        | 1.69 (0.54,5.28) | 0.36                 |
|                                       |     | -0.50 (-1.67,0.67), p=0.4   |                   |                       | 0.20 (-0.56,0.96), p=0.6   |                    |                       | -1.35 (-3.06,0.37), p=0.12 |                  |                      |
| Carbon monoxide                       |     |                             |                   |                       |                            |                    |                       |                            |                  |                      |
| -                                     | -   | 240/460                     | 1.00 ref          |                       | 85/460                     | 1.00 ref           |                       | 155/460                    | 1.00 ref         |                      |
| +                                     | -   | 109/147                     | 1.19 (0.85, 1.66) | 0.31                  | 46/147                     | 1.49 (0.94, 2.35)  | 0.088                 | 63/147                     | 1.10 (0.74,1.65) | 0.63                 |
| -                                     | +   | 698/418                     | 3.14 (2.55, 3.85) | 1.2×10 <sup>-27</sup> | 531/418                    | 7.08 (5.36, 9.35)  | 2.9×10 <sup>-43</sup> | 167/418                    | 1.18 (0.90,1.54) | 0.22                 |
| +                                     | +   | 390/148                     | 4.30 (3.21, 5.76) | 1.7×10 <sup>-22</sup> | 295/148                    | 9.84 (6.85,14.14)  | 4.3×10 <sup>-35</sup> | 95/148                     | 1.55 (1.06,2.25) | 0.023                |
|                                       |     | 0.23 (0.02,0.43), p=0.032   |                   |                       | 0.23 (0.01,0.45), p=0.042  |                    |                       | 0.17 (-0.19,0.53), p=0.35  |                  |                      |
| Detergents                            |     |                             |                   |                       |                            |                    |                       |                            |                  |                      |
| -                                     | -   | 240/460                     | 1.00 ref          |                       | 85/460                     | 1.00 ref           |                       | 155/460                    | 1.00 ref         |                      |
| +                                     | -   | 399/626                     | 1.13 (0.91, 1.39) | 0.26                  | 164/626                    | 1.37 (1.01, 1.85)  | 0.040                 | 235/626                    | 1.03 (0.81,1.32) | 0.81                 |

|                         |   |                            |                   |                       |                             |                    |                       |                            |                  |       |
|-------------------------|---|----------------------------|-------------------|-----------------------|-----------------------------|--------------------|-----------------------|----------------------------|------------------|-------|
| -                       | + | 698/418                    | 3.11 (2.53, 3.82) | $1.6 \times 10^{-27}$ | 531/418                     | 6.94 (5.27, 9.14)  | $2.2 \times 10^{-43}$ | 167/418                    | 1.18 (0.90,1.53) | 0.23  |
| +                       | + | 1272/655                   | 3.36 (2.77, 4.07) | $8.3 \times 10^{-35}$ | 951/655                     | 7.30 (5.61, 9.52)  | $4.3 \times 10^{-49}$ | 321/655                    | 1.36 (1.07,1.73) | 0.011 |
|                         |   | 0.04 (-0.13,0.20), p=0.67  |                   |                       | 0.00 (-0.17,0.17), p=0.99   |                    |                       | 0.11 (-0.16,0.38), p=0.41  |                  |       |
| Flour dust              |   |                            |                   |                       |                             |                    |                       |                            |                  |       |
| -                       | - | 240/460                    | 1.00 ref          |                       | 85/460                      | 1.00 ref           |                       | 155/460                    | 1.00 ref         |       |
| +                       | - | 7/9                        | 1.47 (0.52, 4.17) | 0.47                  | 3/9                         | 1.71 (0.42, 6.95)  | 0.45                  | 4/9                        | 1.19 (0.34,4.24) | 0.78  |
| -                       | + | 698/418                    | 3.09 (2.51, 3.80) | $1.0 \times 10^{-26}$ | 531/418                     | 6.97 (5.27, 9.22)  | $3.6 \times 10^{-42}$ | 167/418                    | 1.15 (0.88,1.50) | 0.31  |
| +                       | + | 26/15                      | 3.03 (1.50, 6.12) | $2.0 \times 10^{-3}$  | 17/15                       | 7.20 (3.18,16.27)  | $2.1 \times 10^{-6}$  | 9/15                       | 1.18 (0.47,2.98) | 0.73  |
|                         |   | -0.17 (-1.11,0.77), p=0.72 |                   |                       | -0.07 (-0.96,0.82), p=0.88  |                    |                       | -0.14 (-1.76,1.49), p=0.87 |                  |       |
| Fungicides              |   |                            |                   |                       |                             |                    |                       |                            |                  |       |
| -                       | - | 240/460                    | 1.00 ref          |                       | 85/460                      | 1.00 ref           |                       | 155/460                    | 1.00 ref         |       |
| +                       | - | 10/11                      | 1.64 (0.65, 4.11) | 0.29                  | 2/11                        | 1.15 (0.24, 5.50)  | 0.86                  | 8/11                       | 2.07 (0.76,5.63) | 0.16  |
| -                       | + | 698/418                    | 3.09 (2.51, 3.80) | $1.1 \times 10^{-26}$ | 531/418                     | 6.93 (5.24, 9.17)  | $5.4 \times 10^{-42}$ | 167/418                    | 1.14 (0.87,1.50) | 0.33  |
| +                       | + | 35/9                       | 6.77 (3.10,14.80) | $1.7 \times 10^{-6}$  | 27/9                        | 16.18 (6.98,37.53) | $8.8 \times 10^{-11}$ | 8/9                        | 2.33 (0.85,6.40) | 0.10  |
|                         |   | 0.45 (-0.03,0.92), p=0.064 |                   |                       | 0.56 (0.19,0.93), p=0.0031  |                    |                       | 0.05 (-1.23,1.33), p=0.94  |                  |       |
| Gasoline engine exhaust |   |                            |                   |                       |                             |                    |                       |                            |                  |       |
| -                       | - | 240/460                    | 1.00 ref          |                       | 85/460                      | 1.00 ref           |                       | 155/460                    | 1.00 ref         |       |
| +                       | - | 28/31                      | 1.58 (0.88, 2.84) | 0.12                  | 11/31                       | 2.30 (1.04, 5.06)  | 0.039                 | 17/31                      | 1.30 (0.65,2.59) | 0.46  |
| -                       | + | 698/418                    | 3.08 (2.50, 3.79) | $1.7 \times 10^{-26}$ | 531/418                     | 6.95 (5.25, 9.19)  | $5.2 \times 10^{-42}$ | 167/418                    | 1.14 (0.87,1.49) | 0.33  |
| +                       | + | 79/21                      | 6.54 (3.73,11.46) | $5.6 \times 10^{-11}$ | 60/21                       | 17.06 (9.17,31.74) | $3.3 \times 10^{-19}$ | 19/21                      | 1.96 (0.92,4.15) | 0.080 |
|                         |   | 0.44 (0.12,0.76), p=0.0073 |                   |                       | 0.52 (0.23,0.80), p=0.00041 |                    |                       | 0.26 (-0.40,0.92), p=0.43  |                  |       |
| Lead                    |   |                            |                   |                       |                             |                    |                       |                            |                  |       |
| -                       | - | 240/460                    | 1.00 ref          |                       | 85/460                      | 1.00 ref           |                       | 155/460                    | 1.00 ref         |       |
| +                       | - | 29/46                      | 1.13 (0.67, 1.90) | 0.65                  | 16/46                       | 1.78 (0.92, 3.42)  | 0.085                 | 13/46                      | 0.80 (0.40,1.60) | 0.53  |
| -                       | + | 698/418                    | 3.12 (2.54, 3.84) | $2.8 \times 10^{-27}$ | 531/418                     | 6.96 (5.27, 9.19)  | $1.4 \times 10^{-42}$ | 167/418                    | 1.16 (0.89,1.51) | 0.29  |
| +                       | + | 91/45                      | 3.65 (2.39, 5.58) | $2.0 \times 10^{-9}$  | 71/45                       | 9.42 (5.77,15.39)  | $3.1 \times 10^{-19}$ | 20/45                      | 1.06 (0.58,1.95) | 0.84  |
|                         |   | 0.11 (-0.27,0.50), p=0.57  |                   |                       | 0.18 (-0.19,0.55), p=0.35   |                    |                       | -0.09 (-0.81,0.63), p=0.8  |                  |       |
| Oil mist                |   |                            |                   |                       |                             |                    |                       |                            |                  |       |
| -                       | - | 240/460                    | 1.00 ref          |                       | 85/460                      | 1.00 ref           |                       | 155/460                    | 1.00 ref         |       |
| +                       | - | 22/38                      | 1.03 (0.57, 1.87) | 0.91                  | 10/38                       | 1.51 (0.69, 3.34)  | 0.30                  | 12/38                      | 0.84 (0.40,1.77) | 0.65  |
| -                       | + | 698/418                    | 3.06 (2.49, 3.76) | $2.4 \times 10^{-26}$ | 531/418                     | 6.89 (5.21, 9.10)  | $4.8 \times 10^{-42}$ | 167/418                    | 1.14 (0.87,1.49) | 0.34  |
| +                       | + | 89/42                      | 3.42 (2.18, 5.36) | $9.0 \times 10^{-8}$  | 68/42                       | 8.89 (5.26,15.01)  | $3.2 \times 10^{-16}$ | 21/42                      | 0.99 (0.53,1.86) | 0.99  |
|                         |   | 0.10 (-0.32,0.51), p=0.65  |                   |                       | 0.17 (-0.24,0.57), p=0.42   |                    |                       | -0.01 (-0.76,0.73), p=0.97 |                  |       |
| Pulp or paper dust      |   |                            |                   |                       |                             |                    |                       |                            |                  |       |
| -                       | - | 240/460                    | 1.00 ref          |                       | 85/460                      | 1.00 ref           |                       | 155/460                    | 1.00 ref         |       |

|                            |   |   |                             |                   |                       |                             |                    |                       |                            |                  |                      |
|----------------------------|---|---|-----------------------------|-------------------|-----------------------|-----------------------------|--------------------|-----------------------|----------------------------|------------------|----------------------|
|                            | + | - | 45/67                       | 1.18 (0.77, 1.81) | 0.46                  | 23/67                       | 1.76 (1.00, 3.09)  | 0.051                 | 22/67                      | 0.93 (0.54,1.60) | 0.80                 |
|                            | - | + | 698/418                     | 3.10 (2.52, 3.81) | $6.1 \times 10^{-27}$ | 531/418                     | 7.01 (5.30, 9.27)  | $1.9 \times 10^{-42}$ | 167/418                    | 1.17 (0.90,1.53) | 0.25                 |
|                            | + | + | 161/79                      | 3.38 (2.42, 4.72) | $7.4 \times 10^{-13}$ | 126/79                      | 7.89 (5.32,11.71)  | $9.8 \times 10^{-25}$ | 35/79                      | 1.10 (0.69,1.75) | 0.70                 |
|                            |   |   | 0.03 (-0.30,0.36), p=0.86   |                   |                       | 0.02 (-0.33,0.36), p=0.93   |                    |                       | 0.00 (-0.60,0.61), p=0.99  |                  |                      |
| Quartz dust                |   |   |                             |                   |                       |                             |                    |                       |                            |                  |                      |
|                            | - | - | 240/460                     | 1.00 ref          |                       | 85/460                      | 1.00 ref           |                       | 155/460                    | 1.00 ref         |                      |
|                            | + | - | 48/49                       | 1.65 (1.01, 2.70) | 0.047                 | 19/49                       | 2.12 (1.10, 4.12)  | 0.025                 | 29/49                      | 1.44 (0.80,2.59) | 0.22                 |
|                            | - | + | 698/418                     | 3.11 (2.53, 3.82) | $3.8 \times 10^{-27}$ | 531/418                     | 6.87 (5.20, 9.07)  | $4.6 \times 10^{-42}$ | 167/418                    | 1.16 (0.89,1.52) | 0.27                 |
|                            | + | + | 161/55                      | 5.26 (3.50, 7.90) | $1.4 \times 10^{-15}$ | 114/55                      | 12.42 (7.64,20.17) | $2.5 \times 10^{-24}$ | 47/55                      | 1.99 (1.19,3.33) | $8.6 \times 10^{-3}$ |
|                            |   |   | 0.29 (0.00,0.57), p=0.047   |                   |                       | 0.36 (0.08,0.63), p=0.01    |                    |                       | 0.20 (-0.30,0.69), p=0.44  |                  |                      |
| Softwood dust              |   |   |                             |                   |                       |                             |                    |                       |                            |                  |                      |
|                            | - | - | 240/460                     | 1.00 ref          |                       | 85/460                      | 1.00 ref           |                       | 155/460                    | 1.00 ref         |                      |
|                            | + | - | 32/49                       | 1.21 (0.72, 2.05) | 0.48                  | 10/49                       | 1.17 (0.54, 2.56)  | 0.69                  | 22/49                      | 1.18 (0.64,2.19) | 0.59                 |
|                            | - | + | 698/418                     | 3.12 (2.54, 3.84) | $3.4 \times 10^{-27}$ | 531/418                     | 6.96 (5.26, 9.19)  | $2.9 \times 10^{-42}$ | 167/418                    | 1.17 (0.89,1.52) | 0.26                 |
|                            | + | + | 110/48                      | 4.13 (2.70, 6.33) | $6.8 \times 10^{-11}$ | 75/48                       | 10.07 (6.07,16.72) | $3.9 \times 10^{-19}$ | 35/48                      | 1.62 (0.94,2.79) | 0.080                |
|                            |   |   | 0.19 (-0.15,0.53), p=0.27   |                   |                       | 0.29 (-0.03,0.62), p=0.078  |                    |                       | 0.17 (-0.40,0.74), p=0.56  |                  |                      |
| Textile dust               |   |   |                             |                   |                       |                             |                    |                       |                            |                  |                      |
|                            | - | - | 240/460                     | 1.00 ref          |                       | 85/460                      | 1.00 ref           |                       | 155/460                    | 1.00 ref         |                      |
|                            | + | - | 28/49                       | 0.90 (0.53, 1.52) | 0.69                  | 14/49                       | 1.34 (0.68, 2.67)  | 0.40                  | 14/49                      | 0.66 (0.34,1.31) | 0.24                 |
|                            | - | + | 698/418                     | 3.11 (2.53, 3.83) | $6.8 \times 10^{-27}$ | 531/418                     | 7.06 (5.33, 9.35)  | $1.8 \times 10^{-42}$ | 167/418                    | 1.15 (0.88,1.51) | 0.30                 |
|                            | + | + | 72/36                       | 3.04 (1.90, 4.85) | $3.6 \times 10^{-6}$  | 52/36                       | 6.98 (4.06,11.99)  | $2.1 \times 10^{-12}$ | 20/36                      | 1.23 (0.65,2.34) | 0.52                 |
|                            |   |   | -0.01 (-0.47,0.46), p=0.97  |                   |                       | -0.06 (-0.60,0.48), p=0.82  |                    |                       | -0.36 (-1.15,0.42), p=0.37 |                  |                      |
| Toluene                    |   |   |                             |                   |                       |                             |                    |                       |                            |                  |                      |
|                            | - | - | 240/460                     | 1.00 ref          |                       | 85/460                      | 1.00 ref           |                       | 155/460                    | 1.00 ref         |                      |
|                            | + | - | 11/10                       | 1.40 (0.55, 3.54) | 0.48                  | 5/10                        | 2.31 (0.70, 7.64)  | 0.17                  | 6/10                       | 1.05 (0.34,3.22) | 0.93                 |
|                            | - | + | 698/418                     | 3.11 (2.53, 3.83) | $7.7 \times 10^{-27}$ | 531/418                     | 6.98 (5.27, 9.23)  | $4.1 \times 10^{-42}$ | 167/418                    | 1.15 (0.88,1.50) | 0.32                 |
|                            | + | + | 42/15                       | 4.88 (2.54, 9.38) | $2.0 \times 10^{-6}$  | 32/15                       | 12.80 (6.25,26.20) | $3.1 \times 10^{-12}$ | 10/15                      | 1.66 (0.68,4.08) | 0.26                 |
|                            |   |   | 0.28 (-0.24,0.80), p=0.29   |                   |                       | 0.35 (-0.13,0.83), p=0.15   |                    |                       | 0.28 (-0.64,1.21), p=0.55  |                  |                      |
| Welding fume               |   |   |                             |                   |                       |                             |                    |                       |                            |                  |                      |
|                            | - | - | 240/460                     | 1.00 ref          |                       | 85/460                      | 1.00 ref           |                       | 155/460                    | 1.00 ref         |                      |
|                            | + | - | 13/26                       | 0.85 (0.41, 1.77) | 0.67                  | 3/26                        | 0.72 (0.20, 2.54)  | 0.61                  | 10/26                      | 0.90 (0.39,2.05) | 0.79                 |
|                            | - | + | 698/418                     | 3.11 (2.53, 3.83) | $4.9 \times 10^{-27}$ | 531/418                     | 7.00 (5.29, 9.26)  | $2.7 \times 10^{-42}$ | 167/418                    | 1.17 (0.89,1.52) | 0.26                 |
|                            | + | + | 84/28                       | 5.60 (3.34, 9.41) | $6.9 \times 10^{-11}$ | 62/28                       | 13.69 (7.55,24.81) | $6.7 \times 10^{-18}$ | 22/28                      | 1.98 (1.01,3.88) | 0.047                |
|                            |   |   | -0.85 (-1.75,0.06), p=0.068 |                   |                       | -0.99 (-2.08,0.09), p=0.071 |                    |                       | -0.79 (-2.02,0.45), p=0.21 |                  |                      |
| Volatile sulphur compounds |   |   |                             |                   |                       |                             |                    |                       |                            |                  |                      |

|                                                                                   |   |         |                            |                       |         |                            |                       |         |                            |      |
|-----------------------------------------------------------------------------------|---|---------|----------------------------|-----------------------|---------|----------------------------|-----------------------|---------|----------------------------|------|
| -                                                                                 | - | 240/460 | 1.00 ref                   |                       | 85/460  | 1.00 ref                   |                       | 155/460 | 1.00 ref                   |      |
| +                                                                                 | - | 36/56   | 1.05 (0.64, 1.73)          | 0.83                  | 13/56   | 1.17 (0.57, 2.38)          | 0.67                  | 23/56   | 0.99 (0.55,1.77)           | 0.97 |
| -                                                                                 | + | 698/418 | 3.09 (2.52, 3.81)          | $9.7 \times 10^{-27}$ | 531/418 | 6.95 (5.26, 9.19)          | $4.0 \times 10^{-42}$ | 167/418 | 1.14 (0.87,1.49)           | 0.33 |
| +                                                                                 | + | 105/46  | 3.83 (2.50, 5.85)          | $5.6 \times 10^{-10}$ | 77/46   | 8.84 (5.41,14.44)          | $3.4 \times 10^{-18}$ | 28/46   | 1.33 (0.76,2.33)           | 0.32 |
|                                                                                   |   |         | 0.18 (-0.17,0.53), p=0.32  |                       |         | 0.19 (-0.17,0.56), p=0.29  |                       |         | -0.17 (-0.95,0.61), p=0.67 |      |
| <b>Other agents in correlation with any of the sixteen independent particiles</b> |   |         |                            |                       |         |                            |                       |         |                            |      |
| Aliphatic and alicyclic hydrocarbon solvents                                      |   |         |                            |                       |         |                            |                       |         |                            |      |
| -                                                                                 | - | 240/460 | 1.00 ref                   |                       | 85/460  | 1.00 ref                   |                       | 155/460 | 1.00 ref                   |      |
| +                                                                                 | - | 9/13    | 1.02 (0.41, 2.58)          | 0.96                  | 4/13    | 1.33 (0.38, 4.63)          | 0.65                  | 5/13    | 0.80 (0.25,2.50)           | 0.70 |
| -                                                                                 | + | 698/418 | 3.10 (2.52, 3.81)          | $1.1 \times 10^{-26}$ | 531/418 | 6.99 (5.28, 9.25)          | $4.5 \times 10^{-42}$ | 167/418 | 1.15 (0.88,1.50)           | 0.30 |
| +                                                                                 | + | 43/18   | 3.99 (2.16, 7.36)          | $9.6 \times 10^{-6}$  | 30/18   | 9.25 (4.64,18.42)          | $2.5 \times 10^{-10}$ | 13/18   | 1.87 (0.84,4.17)           | 0.13 |
|                                                                                   |   |         | 0.22 (-0.30,0.74), p=0.41  |                       |         | 0.21 (-0.33,0.75), p=0.45  |                       |         | -0.80 (-2.29,0.70), p=0.3  |      |
| Animal dust                                                                       |   |         |                            |                       |         |                            |                       |         |                            |      |
| -                                                                                 | - | 240/460 | 1.00 ref                   |                       | 85/460  | 1.00 ref                   |                       | 155/460 | 1.00 ref                   |      |
| +                                                                                 | - | 30/48   | 1.12 (0.66, 1.88)          | 0.68                  | 11/48   | 1.31 (0.62, 2.78)          | 0.48                  | 19/48   | 1.00 (0.54,1.86)           | 10   |
| -                                                                                 | + | 698/418 | 3.11 (2.53, 3.82)          | $7.7 \times 10^{-27}$ | 531/418 | 6.97 (5.27, 9.22)          | $4.0 \times 10^{-42}$ | 167/418 | 1.15 (0.88,1.50)           | 0.30 |
| +                                                                                 | + | 77/44   | 3.17 (2.05, 4.89)          | $2.0 \times 10^{-7}$  | 54/44   | 6.52 (3.93,10.80)          | $3.7 \times 10^{-13}$ | 23/44   | 1.38 (0.77,2.48)           | 0.28 |
|                                                                                   |   |         | -0.02 (-0.47,0.43), p=0.94 |                       |         | -0.12 (-0.64,0.41), p=0.66 |                       |         | -0.20 (-1.05,0.65), p=0.65 |      |
| Aromatic hydrocarbon solvents                                                     |   |         |                            |                       |         |                            |                       |         |                            |      |
| -                                                                                 | - | 240/460 | 1.00 ref                   |                       | 85/460  | 1.00 ref                   |                       | 155/460 | 1.00 ref                   |      |
| +                                                                                 | - | 12/14   | 1.14 (0.49, 2.66)          | 0.76                  | 5/14    | 1.73 (0.55, 5.42)          | 0.34                  | 7/14    | 0.87 (0.32,2.39)           | 0.79 |
| -                                                                                 | + | 698/418 | 3.10 (2.52, 3.81)          | $9.4 \times 10^{-27}$ | 531/418 | 6.98 (5.28, 9.24)          | $3.9 \times 10^{-42}$ | 167/418 | 1.15 (0.88,1.50)           | 0.32 |
| +                                                                                 | + | 47/17   | 4.60 (2.47, 8.57)          | $1.5 \times 10^{-6}$  | 35/17   | 11.93 (5.99,23.75)         | $1.7 \times 10^{-12}$ | 12/17   | 1.64 (0.71,3.80)           | 0.24 |
|                                                                                   |   |         | 0.29 (-0.17,0.76), p=0.22  |                       |         | 0.35 (-0.09,0.80), p=0.12  |                       |         | -0.55 (-1.93,0.83), p=0.44 |      |
| Benzo(a)pyrene                                                                    |   |         |                            |                       |         |                            |                       |         |                            |      |
| -                                                                                 | - | 240/460 | 1.00 ref                   |                       | 85/460  | 1.00 ref                   |                       | 155/460 | 1.00 ref                   |      |
| +                                                                                 | - | 57/73   | 1.35 (0.88, 2.07)          | 0.16                  | 27/73   | 2.00 (1.14, 3.50)          | 0.015                 | 30/73   | 1.08 (0.63,1.82)           | 0.79 |
| -                                                                                 | + | 698/418 | 3.12 (2.54, 3.83)          | $2.9 \times 10^{-27}$ | 531/418 | 7.03 (5.32, 9.29)          | $7.8 \times 10^{-43}$ | 167/418 | 1.17 (0.89,1.52)           | 0.26 |
| +                                                                                 | + | 169/82  | 3.34 (2.32, 4.82)          | $1.0 \times 10^{-10}$ | 131/82  | 8.32 (5.38,12.86)          | $1.6 \times 10^{-21}$ | 38/82   | 1.00 (0.60,1.66)           | 10   |
|                                                                                   |   |         | -0.04 (-0.40,0.32), p=0.83 |                       |         | 0.03 (-0.33,0.40), p=0.85  |                       |         | -0.24 (-0.99,0.51), p=0.53 |      |
| Chromium                                                                          |   |         |                            |                       |         |                            |                       |         |                            |      |
| -                                                                                 | - | 240/460 | 1.00 ref                   |                       | 85/460  | 1.00 ref                   |                       | 155/460 | 1.00 ref                   |      |
| +                                                                                 | - | 11/27   | 0.74 (0.35, 1.60)          | 0.45                  | 4/27    | 0.85 (0.28, 2.64)          | 0.78                  | 7/27    | 0.67 (0.26,1.70)           | 0.40 |
| -                                                                                 | + | 698/418 | 3.07 (2.50, 3.77)          | $2.0 \times 10^{-26}$ | 531/418 | 6.95 (5.25, 9.19)          | $4.6 \times 10^{-42}$ | 167/418 | 1.13 (0.87,1.48)           | 0.36 |
| +                                                                                 | + | 46/20   | 3.73 (2.06, 6.73)          | $1.3 \times 10^{-5}$  | 37/20   | 10.01 (5.21,19.22)         | $4.5 \times 10^{-12}$ | 9/20    | 0.87 (0.36,2.11)           | 0.76 |

|                        |   |         |                            |                       |         |                            |                       |         |                            |       |  |
|------------------------|---|---------|----------------------------|-----------------------|---------|----------------------------|-----------------------|---------|----------------------------|-------|--|
|                        |   |         | -0.30 (-1.02,0.42), p=0.42 |                       |         | -0.46 (-1.36,0.44), p=0.31 |                       |         | -0.06 (-0.92,0.80), p=0.89 |       |  |
| Diesel engine exhaust  |   |         |                            |                       |         |                            |                       |         |                            |       |  |
| -                      | - | 240/460 | 1.00 ref                   |                       | 85/460  | 1.00 ref                   |                       | 155/460 | 1.00 ref                   |       |  |
| +                      | - | 60/71   | 1.32 (0.87, 2.01)          | 0.19                  | 25/71   | 1.82 (1.03, 3.21)          | 0.040                 | 35/71   | 1.12 (0.68,1.84)           | 0.65  |  |
| -                      | + | 698/418 | 3.07 (2.50, 3.78)          | 1.1×10 <sup>-26</sup> | 531/418 | 6.95 (5.27, 9.18)          | 1.6×10 <sup>-42</sup> | 167/418 | 1.14 (0.88,1.49)           | 0.33  |  |
| +                      | + | 199/69  | 4.72 (3.30, 6.75)          | 2.1×10 <sup>-17</sup> | 152/69  | 11.80 (7.72,18.05)         | 4.7×10 <sup>-30</sup> | 47/69   | 1.51 (0.94,2.42)           | 0.090 |  |
|                        |   |         | 0.28 (0.03,0.53), p=0.029  |                       |         | 0.34 (0.10,0.58), p=0.0057 |                       |         | 0.16 (-0.32,0.65), p=0.51  |       |  |
| Hardwood dust          |   |         |                            |                       |         |                            |                       |         |                            |       |  |
| -                      | - | 240/460 | 1.00 ref                   |                       | 85/460  | 1.00 ref                   |                       | 155/460 | 1.00 ref                   |       |  |
| +                      | - | 31/49   | 1.17 (0.69, 1.99)          | 0.55                  | 10/49   | 1.17 (0.53, 2.56)          | 0.69                  | 21/49   | 1.12 (0.60,2.09)           | 0.72  |  |
| -                      | + | 698/418 | 3.12 (2.54, 3.84)          | 3.2×10 <sup>-27</sup> | 531/418 | 6.97 (5.27, 9.22)          | 2.5×10 <sup>-42</sup> | 167/418 | 1.17 (0.89,1.52)           | 0.26  |  |
| +                      | + | 108/47  | 4.14 (2.69, 6.36)          | 9.6×10 <sup>-11</sup> | 73/47   | 10.01 (6.00,16.71)         | 1.1×10 <sup>-18</sup> | 35/47   | 1.67 (0.97,2.88)           | 0.066 |  |
|                        |   |         | 0.20 (-0.14,0.54), p=0.24  |                       |         | 0.29 (-0.05,0.62), p=0.091 |                       |         | 0.23 (-0.31,0.76), p=0.4   |       |  |
| Herbicides             |   |         |                            |                       |         |                            |                       |         |                            |       |  |
| -                      | - | 240/460 | 1.00 ref                   |                       | 85/460  | 1.00 ref                   |                       | 155/460 | 1.00 ref                   |       |  |
| +                      | - | 16/36   | 0.87 (0.45, 1.69)          | 0.68                  | 5/36    | 0.84 (0.30, 2.41)          | 0.75                  | 11/36   | 0.83 (0.38,1.79)           | 0.63  |  |
| -                      | + | 698/418 | 3.10 (2.52, 3.82)          | 9.0×10 <sup>-27</sup> | 531/418 | 7.00 (5.29, 9.27)          | 3.9×10 <sup>-42</sup> | 167/418 | 1.15 (0.88,1.50)           | 0.32  |  |
| +                      | + | 38/26   | 2.99 (1.70, 5.26)          | 1.5×10 <sup>-4</sup>  | 26/26   | 6.47 (3.39,12.34)          | 1.5×10 <sup>-8</sup>  | 12/26   | 1.19 (0.54,2.61)           | 0.66  |  |
|                        |   |         | 0.00 (-0.56,0.55), p=0.99  |                       |         | 0.05 (-0.52,0.63), p=0.85  |                       |         | -0.19 (-1.15,0.78), p=0.7  |       |  |
| Insecticides           |   |         |                            |                       |         |                            |                       |         |                            |       |  |
| -                      | - | 240/460 | 1.00 ref                   |                       | 85/460  | 1.00 ref                   |                       | 155/460 | 1.00 ref                   |       |  |
| +                      | - | 10/11   | 1.64 (0.65, 4.11)          | 0.29                  | 2/11    | 1.15 (0.24, 5.50)          | 0.86                  | 8/11    | 2.07 (0.76,5.63)           | 0.16  |  |
| -                      | + | 698/418 | 3.09 (2.51, 3.80)          | 1.1×10 <sup>-26</sup> | 531/418 | 6.93 (5.24, 9.17)          | 5.4×10 <sup>-42</sup> | 167/418 | 1.14 (0.87,1.50)           | 0.33  |  |
| +                      | + | 35/9    | 6.77 (3.10,14.80)          | 1.7×10 <sup>-6</sup>  | 27/9    | 16.18 (6.98,37.53)         | 8.8×10 <sup>-11</sup> | 8/9     | 2.33 (0.85,6.40)           | 0.10  |  |
|                        |   |         | 0.45 (-0.03,0.92), p=0.064 |                       |         | 0.56 (0.19,0.93), p=0.0031 |                       |         | 0.05 (-1.23,1.33), p=0.94  |       |  |
| Iron                   |   |         |                            |                       |         |                            |                       |         |                            |       |  |
| -                      | - | 240/460 | 1.00 ref                   |                       | 85/460  | 1.00 ref                   |                       | 155/460 | 1.00 ref                   |       |  |
| +                      | - | 80/101  | 1.33 (0.92, 1.95)          | 0.13                  | 31/101  | 1.61 (0.96, 2.70)          | 0.074                 | 49/101  | 1.25 (0.80,1.97)           | 0.33  |  |
| -                      | + | 698/418 | 3.12 (2.54, 3.84)          | 2.3×10 <sup>-27</sup> | 531/418 | 7.02 (5.32, 9.27)          | 6.2×10 <sup>-43</sup> | 167/418 | 1.18 (0.91,1.54)           | 0.22  |  |
| +                      | + | 276/110 | 4.17 (3.01, 5.78)          | 1.2×10 <sup>-17</sup> | 213/110 | 10.13 (6.80,15.07)         | 3.8×10 <sup>-30</sup> | 63/110  | 1.32 (0.86,2.04)           | 0.20  |  |
|                        |   |         | 0.17 (-0.08,0.42), p=0.18  |                       |         | 0.25 (0.00,0.50), p=0.052  |                       |         | -0.08 (-0.62,0.45), p=0.76 |       |  |
| Manmade mineral fibres |   |         |                            |                       |         |                            |                       |         |                            |       |  |
| -                      | - | 240/460 | 1.00 ref                   |                       | 85/460  | 1.00 ref                   |                       | 155/460 | 1.00 ref                   |       |  |
| +                      | - | 26/31   | 1.37 (0.74, 2.54)          | 0.31                  | 12/31   | 2.38 (1.08, 5.26)          | 0.032                 | 14/31   | 0.94 (0.44,2.00)           | 0.86  |  |
| -                      | + | 698/418 | 3.11 (2.53, 3.82)          | 4.3×10 <sup>-27</sup> | 531/418 | 6.91 (5.23, 9.12)          | 3.9×10 <sup>-42</sup> | 167/418 | 1.16 (0.89,1.52)           | 0.27  |  |

|                                  |   |   |         |                            |                       |         |                             |                       |         |                             |                      |
|----------------------------------|---|---|---------|----------------------------|-----------------------|---------|-----------------------------|-----------------------|---------|-----------------------------|----------------------|
|                                  | + | + | 93/42   | 4.01 (2.52, 6.40)          | $5.4 \times 10^{-9}$  | 62/42   | 9.54 (5.47, 16.64)          | $1.8 \times 10^{-15}$ | 31/42   | 1.63 (0.90, 2.94)           | 0.11                 |
|                                  |   |   |         | 0.13 (-0.27, 0.54), p=0.52 |                       |         | 0.13 (-0.31, 0.57), p=0.56  |                       |         | -0.45 (-1.38, 0.47), p=0.34 |                      |
| Other organic solvents           |   |   |         |                            |                       |         |                             |                       |         |                             |                      |
|                                  | - | - | 240/460 | 1.00 ref                   |                       | 85/460  | 1.00 ref                    |                       | 155/460 | 1.00 ref                    |                      |
|                                  | + | - | 9/13    | 1.02 (0.41, 2.58)          | 0.96                  | 4/13    | 1.33 (0.38, 4.63)           | 0.65                  | 5/13    | 0.80 (0.25, 2.50)           | 0.70                 |
|                                  | - | + | 698/418 | 3.10 (2.52, 3.81)          | $1.1 \times 10^{-26}$ | 531/418 | 6.99 (5.28, 9.25)           | $4.5 \times 10^{-42}$ | 167/418 | 1.15 (0.88, 1.50)           | 0.30                 |
|                                  | + | + | 43/18   | 3.99 (2.16, 7.36)          | $9.6 \times 10^{-6}$  | 30/18   | 9.25 (4.64, 18.42)          | $2.5 \times 10^{-10}$ | 13/18   | 1.87 (0.84, 4.17)           | 0.13                 |
|                                  |   |   |         | 0.22 (-0.30, 0.74), p=0.41 |                       |         | 0.21 (-0.33, 0.75), p=0.45  |                       |         | -0.80 (-2.29, 0.70), p=0.3  |                      |
| Plant dust                       |   |   |         |                            |                       |         |                             |                       |         |                             |                      |
|                                  | - | - | 240/460 | 1.00 ref                   |                       | 85/460  | 1.00 ref                    |                       | 155/460 | 1.00 ref                    |                      |
|                                  | + | - | 32/53   | 1.05 (0.63, 1.77)          | 0.84                  | 11/53   | 1.13 (0.53, 2.42)           | 0.74                  | 21/53   | 0.99 (0.54, 1.82)           | 0.98                 |
|                                  | - | + | 698/418 | 3.10 (2.52, 3.81)          | $8.4 \times 10^{-27}$ | 531/418 | 6.95 (5.25, 9.19)           | $4.4 \times 10^{-42}$ | 167/418 | 1.15 (0.88, 1.50)           | 0.32                 |
|                                  | + | + | 83/45   | 3.16 (2.04, 4.90)          | $2.5 \times 10^{-7}$  | 60/45   | 7.09 (4.28, 11.75)          | $2.9 \times 10^{-14}$ | 23/45   | 1.15 (0.63, 2.09)           | 0.65                 |
|                                  |   |   |         | 0.00 (-0.44, 0.44), p=0.99 |                       |         | 0.00 (-0.46, 0.47), p=1     |                       |         | -0.01 (-0.76, 0.74), p=0.98 |                      |
| Polycyclic aromatic hydrocarbons |   |   |         |                            |                       |         |                             |                       |         |                             |                      |
|                                  | - | - | 240/460 | 1.00 ref                   |                       | 85/460  | 1.00 ref                    |                       | 155/460 | 1.00 ref                    |                      |
|                                  | + | - | 63/84   | 1.28 (0.86, 1.93)          | 0.23                  | 28/84   | 1.76 (1.02, 3.03)           | 0.042                 | 35/84   | 1.09 (0.66, 1.79)           | 0.74                 |
|                                  | - | + | 698/418 | 3.10 (2.52, 3.81)          | $4.8 \times 10^{-27}$ | 531/418 | 7.00 (5.30, 9.25)           | $9.0 \times 10^{-43}$ | 167/418 | 1.16 (0.89, 1.51)           | 0.28                 |
|                                  | + | + | 202/89  | 3.61 (2.54, 5.13)          | $7.1 \times 10^{-13}$ | 156/89  | 8.96 (5.89, 13.63)          | $1.2 \times 10^{-24}$ | 46/89   | 1.08 (0.67, 1.74)           | 0.76                 |
|                                  |   |   |         | 0.06 (-0.25, 0.37), p=0.7  |                       |         | 0.13 (-0.18, 0.44), p=0.4   |                       |         | -0.16 (-0.81, 0.50), p=0.64 |                      |
| Stone and concrete               |   |   |         |                            |                       |         |                             |                       |         |                             |                      |
|                                  | - | - | 240/460 | 1.00 ref                   |                       | 85/460  | 1.00 ref                    |                       | 155/460 | 1.00 ref                    |                      |
|                                  | + | - | 91/112  | 1.28 (0.89, 1.85)          | 0.19                  | 36/112  | 1.61 (0.97, 2.66)           | 0.065                 | 55/112  | 1.14 (0.74, 1.76)           | 0.55                 |
|                                  | - | + | 698/418 | 3.08 (2.51, 3.78)          | $6.5 \times 10^{-27}$ | 531/418 | 6.88 (5.22, 9.08)           | $2.0 \times 10^{-42}$ | 167/418 | 1.15 (0.88, 1.50)           | 0.29                 |
|                                  | + | + | 315/110 | 4.60 (3.35, 6.32)          | $3.6 \times 10^{-21}$ | 224/110 | 10.51 (7.12, 15.52)         | $2.5 \times 10^{-32}$ | 91/110  | 1.83 (1.24, 2.72)           | $2.5 \times 10^{-3}$ |
|                                  |   |   |         | 0.27 (0.06, 0.48), p=0.014 |                       |         | 0.29 (0.06, 0.52), p=0.013  |                       |         | 0.29 (-0.03, 0.62), p=0.078 |                      |
| Wood dust                        |   |   |         |                            |                       |         |                             |                       |         |                             |                      |
|                                  | - | - | 240/460 | 1.00 ref                   |                       | 85/460  | 1.00 ref                    |                       | 155/460 | 1.00 ref                    |                      |
|                                  | + | - | 32/49   | 1.21 (0.72, 2.05)          | 0.48                  | 10/49   | 1.17 (0.54, 2.56)           | 0.69                  | 22/49   | 1.18 (0.64, 2.19)           | 0.59                 |
|                                  | - | + | 698/418 | 3.12 (2.54, 3.84)          | $3.4 \times 10^{-27}$ | 531/418 | 6.96 (5.26, 9.19)           | $2.9 \times 10^{-42}$ | 167/418 | 1.17 (0.89, 1.52)           | 0.26                 |
|                                  | + | + | 110/48  | 4.13 (2.70, 6.33)          | $6.8 \times 10^{-11}$ | 75/48   | 10.07 (6.07, 16.72)         | $3.9 \times 10^{-19}$ | 35/48   | 1.62 (0.94, 2.79)           | 0.080                |
|                                  |   |   |         | 0.19 (-0.15, 0.53), p=0.27 |                       |         | 0.29 (-0.03, 0.62), p=0.078 |                       |         | 0.17 (-0.40, 0.74), p=0.56  |                      |

**Supplementary Table 8. Additive interaction effects between occupational inhalable agents and HLA-SE alleles on the development of RA.** Estimates were adjusted for age, sex, residential area, smoking, alcohol drinking, levels of education, body mass index and principal components 1-10. For the OR estimates that were not available due to the limited number of cases within the subgroup, 'not applicable' was marked in corresponding cells.

| Occupational exposure                 | HLA-SE | Overall RA                 |                  |                       | ACPA-positive subtype      |                   |                       | ACPA-negative subtype      |                  |       |
|---------------------------------------|--------|----------------------------|------------------|-----------------------|----------------------------|-------------------|-----------------------|----------------------------|------------------|-------|
|                                       |        | N (case / control)         | OR (95%CI)       | P                     | N (case / control)         | OR (95%CI)        | P                     | N (case / control)         | OR (95%CI)       | P     |
| Exposed to any agents                 |        |                            |                  |                       |                            |                   |                       |                            |                  |       |
| -                                     | -      | 251/414                    | 1.00 ref         |                       | 102/414                    | 1.00 ref          |                       | 149/414                    | 1.00 ref         |       |
| +                                     | -      | 628/901                    | 1.12 (0.91,1.38) | 0.29                  | 244/901                    | 1.08 (0.81,1.45)  | 0.58                  | 384/901                    | 1.17 (0.91,1.5)  | 0.21  |
| -                                     | +      | 653/433                    | 2.54 (2.04,3.16) | 9.2×10 <sup>-17</sup> | 492/433                    | 4.89 (3.69,6.47)  | 2.4×10 <sup>-28</sup> | 161/433                    | 1.05 (0.79,1.4)  | 0.73  |
| +                                     | +      | 1871/1018                  | 2.87 (2.36,3.49) | 6.4×10 <sup>-26</sup> | 1394/1018                  | 5.41 (4.17,7.02)  | 5.3×10 <sup>-37</sup> | 477/1018                   | 1.25 (0.98,1.6)  | 0.068 |
|                                       |        | 0.07 (-0.09,0.23), p=0.37  |                  |                       | 0.08 (-0.08,0.25), p=0.33  |                   |                       | 0.02 (-0.27,0.31), p=0.88  |                  |       |
| <b>The sixteen independent agents</b> |        |                            |                  |                       |                            |                   |                       |                            |                  |       |
| Asbestos                              |        |                            |                  |                       |                            |                   |                       |                            |                  |       |
| -                                     | -      | 251/414                    | 1.00 ref         |                       | 102/414                    | 1.00 ref          |                       | 149/414                    | 1.00 ref         |       |
| +                                     | -      | 28/34                      | 1.36 (0.72,2.6)  | 0.34                  | 12/34                      | 1.87 (0.83,4.21)  | 0.13                  | 16/34                      | 1.01 (0.46,2.22) | 0.98  |
| -                                     | +      | 653/433                    | 2.61 (2.09,3.25) | 2.7×10 <sup>-17</sup> | 492/433                    | 5 (3.76,6.66)     | 1.9×10 <sup>-28</sup> | 161/433                    | 1.07 (0.8,1.43)  | 0.66  |
| +                                     | +      | 91/31                      | 4.96 (2.92,8.41) | 2.9×10 <sup>-9</sup>  | 66/31                      | 9.97 (5.49,18.1)  | 4.1×10 <sup>-14</sup> | 25/31                      | 1.97 (1.3,8.8)   | 0.049 |
|                                       |        | 0.4 (0.07,0.73), p=0.016   |                  |                       | 0.41 (0.08,0.75), p=0.016  |                   |                       | 0.46 (-0.05,0.96), p=0.076 |                  |       |
| Cadmium                               |        |                            |                  |                       |                            |                   |                       |                            |                  |       |
| -                                     | -      | 251/414                    | 1.00 ref         |                       | 102/414                    | 1.00 ref          |                       | 149/414                    | 1.00 ref         |       |
| +                                     | -      | 5/10                       | 0.47 (0.11,2.04) | 0.31                  | 3/10                       | 0.81 (0.15,4.45)  | 0.81                  | 2/10                       | 0.33 (0.04,2.99) | 0.32  |
| -                                     | +      | 653/433                    | 2.64 (2.11,3.3)  | 1.7×10 <sup>-17</sup> | 492/433                    | 5.1 (3.83,6.8)    | 1.3×10 <sup>-28</sup> | 161/433                    | 1.07 (0.8,1.43)  | 0.66  |
| +                                     | +      | 20/12                      | 3.09 (1.31,7.27) | 9.9×10 <sup>-3</sup>  | 16/12                      | 6.23 (2.49,15.59) | 9.4×10 <sup>-5</sup>  | 4/12                       | 1.32 (0.37,4.81) | 0.67  |
|                                       |        | -0.37 (-1.4,0.65), p=0.48  |                  |                       | -0.26 (-1.38,0.86), p=0.65 |                   |                       | -0.87 (-2.62,0.89), p=0.33 |                  |       |
| Carbon monoxide                       |        |                            |                  |                       |                            |                   |                       |                            |                  |       |
| -                                     | -      | 251/414                    | 1.00 ref         |                       | 102/414                    | 1.00 ref          |                       | 149/414                    | 1.00 ref         |       |
| +                                     | -      | 119/140                    | 1.21 (0.85,1.73) | 0.28                  | 39/140                     | 1.02 (0.62,1.67)  | 0.93                  | 80/140                     | 1.35 (0.89,2.06) | 0.16  |
| -                                     | +      | 653/433                    | 2.58 (2.07,3.21) | 4.7×10 <sup>-17</sup> | 492/433                    | 4.98 (3.75,6.61)  | 1.8×10 <sup>-28</sup> | 161/433                    | 1.06 (0.79,1.41) | 0.71  |
| +                                     | +      | 378/153                    | 3.57 (2.61,4.87) | 1.3×10 <sup>-15</sup> | 294/153                    | 7.04 (4.86,10.19) | 4.6×10 <sup>-25</sup> | 84/153                     | 1.34 (0.89,2.01) | 0.17  |
|                                       |        | 0.22 (-0.01,0.44), p=0.058 |                  |                       | 0.29 (0.07,0.51), p=0.01   |                   |                       | -0.05 (-0.55,0.44), p=0.83 |                  |       |
| Detergents                            |        |                            |                  |                       |                            |                   |                       |                            |                  |       |
| -                                     | -      | 251/414                    | 1.00 ref         |                       | 102/414                    | 1.00 ref          |                       | 149/414                    | 1.00 ref         |       |
| +                                     | -      | 438/590                    | 1.15 (0.92,1.44) | 0.21                  | 169/590                    | 1.11 (0.82,1.52)  | 0.50                  | 269/590                    | 1.22 (0.93,1.59) | 0.14  |



|                         |   |          |                            |                       |         |                    |                       |                            |                  |       |
|-------------------------|---|----------|----------------------------|-----------------------|---------|--------------------|-----------------------|----------------------------|------------------|-------|
| -                       | + | 653/433  | 2.54 (2.04,3.16)           | $1.0 \times 10^{-16}$ | 492/433 | 4.88 (3.68,6.47)   | $3.1 \times 10^{-28}$ | 161/433                    | 1.06 (0.8,1.41)  | 0.69  |
| +                       | + | 1259/672 | 2.84 (2.31,3.49)           | $2.9 \times 10^{-23}$ | 940/672 | 5.39 (4.12,7.06)   | $1.0 \times 10^{-34}$ | 319/672                    | 1.25 (0.96,1.61) | 0.096 |
|                         |   |          | 0.05 (-0.12,0.23), p=0.56  |                       |         |                    |                       | -0.03 (-0.35,0.3), p=0.88  |                  |       |
| Flour dust              |   |          |                            |                       |         |                    |                       |                            |                  |       |
| -                       | - | 251/414  | 1.00 ref                   |                       | 102/414 | 1.00 ref           |                       | 149/414                    | 1.00 ref         |       |
| +                       | - | 10/10    | 1.89 (0.71,5)              | 0.20                  | 3/10    | 1.38 (0.32,5.85)   | 0.66                  | 7/10                       | 2.1 (0.71,6.21)  | 0.18  |
| -                       | + | 653/433  | 2.62 (2.09,3.27)           | $2.4 \times 10^{-17}$ | 492/433 | 5.02 (3.77,6.68)   | $2.6 \times 10^{-28}$ | 161/433                    | 1.08 (0.81,1.44) | 0.61  |
| +                       | + | 22/12    | 2.64 (1.2,5.84)            | 0.016                 | 14/12   | 5.45 (2.22,13.36)  | $2.1 \times 10^{-4}$  | 8/12                       | 0.93 (0.31,2.81) | 0.90  |
|                         |   |          | -0.33 (-1.54,0.89), p=0.6  |                       |         |                    |                       | -1.33 (-4.75,2.09), p=0.45 |                  |       |
| Fungicides              |   |          |                            |                       |         |                    |                       |                            |                  |       |
| -                       | - | 251/414  | 1.00 ref                   |                       | 102/414 | 1.00 ref           |                       | 149/414                    | 1.00 ref         |       |
| +                       | - | 11/15    | 0.86 (0.34,2.19)           | 0.75                  | 4/15    | 0.31 (0.04,2.47)   | 0.27                  | 7/15                       | 1.33 (0.49,3.6)  | 0.57  |
| -                       | + | 653/433  | 2.62 (2.1,3.27)            | $2.5 \times 10^{-17}$ | 492/433 | 5.04 (3.78,6.71)   | $2.3 \times 10^{-28}$ | 161/433                    | 1.07 (0.8,1.43)  | 0.65  |
| +                       | + | 33/4     | 13.67 (4.58,40.78)         | $2.7 \times 10^{-6}$  | 27/4    | 30.57 (9.76,95.76) | $4.4 \times 10^{-9}$  | 6/4                        | 4.47 (1.1,18.14) | 0.036 |
|                         |   |          | -4.27 (-9.94,1.4), p=0.14  |                       |         |                    |                       | 0.69 (0.16,1.21), p=0.01   |                  |       |
| Gasoline engine exhaust |   |          |                            |                       |         |                    |                       |                            |                  |       |
| -                       | - | 251/414  | 1.00 ref                   |                       | 102/414 | 1.00 ref           |                       | 149/414                    | 1.00 ref         |       |
| +                       | - | 25/25    | 1.85 (0.96,3.58)           | 0.068                 | 8/25    | 1.61 (0.64,4.05)   | 0.31                  | 17/25                      | 1.99 (0.93,4.23) | 0.076 |
| -                       | + | 653/433  | 2.61 (2.09,3.26)           | $2.9 \times 10^{-17}$ | 492/433 | 5.05 (3.79,6.72)   | $2.1 \times 10^{-28}$ | 161/433                    | 1.07 (0.8,1.43)  | 0.67  |
| +                       | + | 79/28    | 4.92 (2.84,8.52)           | $1.4 \times 10^{-8}$  | 60/28   | 10.79 (5.88,19.77) | $1.5 \times 10^{-14}$ | 19/28                      | 1.7 (0.8,3.62)   | 0.17  |
|                         |   |          | 0.3 (-0.12,0.72), p=0.17   |                       |         |                    |                       | -0.2 (-1.33,0.92), p=0.72  |                  |       |
| Lead                    |   |          |                            |                       |         |                    |                       |                            |                  |       |
| -                       | - | 251/414  | 1.00 ref                   |                       | 102/414 | 1.00 ref           |                       | 149/414                    | 1.00 ref         |       |
| +                       | - | 24/56    | 0.77 (0.43,1.39)           | 0.39                  | 9/56    | 0.83 (0.37,1.83)   | 0.64                  | 15/56                      | 0.77 (0.37,1.61) | 0.49  |
| -                       | + | 653/433  | 2.62 (2.1,3.28)            | $1.8 \times 10^{-17}$ | 492/433 | 5.03 (3.78,6.7)    | $1.5 \times 10^{-28}$ | 161/433                    | 1.08 (0.81,1.45) | 0.60  |
| +                       | + | 82/36    | 3.57 (2.22,5.75)           | $1.5 \times 10^{-7}$  | 68/36   | 7.74 (4.52,13.23)  | $8.0 \times 10^{-14}$ | 14/36                      | 1.12 (0.55,2.26) | 0.76  |
|                         |   |          | -0.45 (-1.09,0.2), p=0.17  |                       |         |                    |                       | -0.24 (-1.12,0.64), p=0.59 |                  |       |
| Oil mist                |   |          |                            |                       |         |                    |                       |                            |                  |       |
| -                       | - | 251/414  | 1.00 ref                   |                       | 102/414 | 1.00 ref           |                       | 149/414                    | 1.00 ref         |       |
| +                       | - | 26/42    | 0.9 (0.49,1.66)            | 0.73                  | 8/42    | 0.93 (0.39,2.19)   | 0.86                  | 18/42                      | 0.86 (0.41,1.82) | 0.70  |
| -                       | + | 653/433  | 2.6 (2.08,3.24)            | $3.6 \times 10^{-17}$ | 492/433 | 5 (3.76,6.65)      | $2.2 \times 10^{-28}$ | 161/433                    | 1.07 (0.8,1.43)  | 0.64  |
| +                       | + | 96/39    | 3.74 (2.29,6.11)           | $1.5 \times 10^{-7}$  | 76/39   | 8.15 (4.69,14.16)  | $9.2 \times 10^{-14}$ | 20/39                      | 1.11 (0.55,2.23) | 0.77  |
|                         |   |          | -0.48 (-1.17,0.21), p=0.18 |                       |         |                    |                       | -0.16 (-1.05,0.72), p=0.72 |                  |       |
| Pulp or paper dust      |   |          |                            |                       |         |                    |                       |                            |                  |       |
| -                       | - | 251/414  | 1.00 ref                   |                       | 102/414 | 1.00 ref           |                       | 149/414                    | 1.00 ref         |       |

|                            |   |   |                            |                  |                       |                             |                   |                       |                            |                  |       |
|----------------------------|---|---|----------------------------|------------------|-----------------------|-----------------------------|-------------------|-----------------------|----------------------------|------------------|-------|
|                            | + | - | 40/69                      | 1.18 (0.74,1.91) | 0.48                  | 24/69                       | 1.79 (1.3,1.9)    | 0.050                 | 16/69                      | 0.82 (0.43,1.55) | 0.54  |
|                            | - | + | 653/433                    | 2.6 (2.08,3.25)  | $3.2 \times 10^{-17}$ | 492/433                     | 5.04 (3.79,6.72)  | $1.6 \times 10^{-28}$ | 161/433                    | 1.07 (0.8,1.43)  | 0.65  |
|                            | + | + | 170/74                     | 3.16 (2.22,4.51) | $1.6 \times 10^{-10}$ | 128/74                      | 6.22 (4.12,9.4)   | $3.5 \times 10^{-18}$ | 42/74                      | 1.31 (0.81,2.1)  | 0.27  |
|                            |   |   | 0.12 (-0.21,0.45), p=0.48  |                  |                       | 0.06 (-0.3,0.42), p=0.73    |                   |                       | -0.39 (-1.15,0.37), p=0.32 |                  |       |
| Quartz dust                |   |   |                            |                  |                       |                             |                   |                       |                            |                  |       |
|                            | - | - | 251/414                    | 1.00 ref         |                       | 102/414                     | 1.00 ref          |                       | 149/414                    | 1.00 ref         |       |
|                            | + | - | 49/47                      | 1.63 (0.95,2.78) | 0.075                 | 18/47                       | 1.56 (0.76,3.2)   | 0.23                  | 31/47                      | 1.69 (0.9,3.18)  | 0.10  |
|                            | - | + | 653/433                    | 2.62 (2.1,3.27)  | $1.7 \times 10^{-17}$ | 492/433                     | 4.98 (3.75,6.62)  | $2.3 \times 10^{-28}$ | 161/433                    | 1.06 (0.79,1.42) | 0.69  |
|                            | + | + | 149/56                     | 4.68 (3,7.32)    | $1.1 \times 10^{-11}$ | 112/56                      | 9.48 (5.68,15.8)  | $6.4 \times 10^{-18}$ | 37/56                      | 1.68 (0.92,3.05) | 0.091 |
|                            |   |   | 0.31 (0.01,0.61), p=0.046  |                  |                       | 0.42 (0.15,0.68), p=0.0024  |                   |                       | -0.05 (-0.78,0.69), p=0.9  |                  |       |
| Softwood dust              |   |   |                            |                  |                       |                             |                   |                       |                            |                  |       |
|                            | - | - | 251/414                    | 1.00 ref         |                       | 102/414                     | 1.00 ref          |                       | 149/414                    | 1.00 ref         |       |
|                            | + | - | 39/44                      | 1.4 (0.81,2.4)   | 0.23                  | 13/44                       | 1.21 (0.57,2.56)  | 0.62                  | 26/44                      | 1.45 (0.77,2.75) | 0.25  |
|                            | - | + | 653/433                    | 2.6 (2.08,3.24)  | $3.0 \times 10^{-17}$ | 492/433                     | 5.01 (3.76,6.66)  | $2.0 \times 10^{-28}$ | 161/433                    | 1.05 (0.79,1.41) | 0.73  |
|                            | + | + | 96/48                      | 3.22 (2.04,5.1)  | $5.6 \times 10^{-7}$  | 68/48                       | 6.53 (3.83,11.13) | $5.1 \times 10^{-12}$ | 28/48                      | 1.44 (0.78,2.63) | 0.24  |
|                            |   |   | 0.07 (-0.36,0.5), p=0.75   |                  |                       | 0.20 (-0.19,0.6), p=0.32    |                   |                       | -0.05 (-0.84,0.74), p=0.91 |                  |       |
| Textile dust               |   |   |                            |                  |                       |                             |                   |                       |                            |                  |       |
|                            | - | - | 251/414                    | 1.00 ref         |                       | 102/414                     | 1.00 ref          |                       | 149/414                    | 1.00 ref         |       |
|                            | + | - | 33/39                      | 0.97 (0.55,1.72) | 0.92                  | 9/39                        | 0.73 (0.3,1.77)   | 0.49                  | 24/39                      | 1.11 (0.58,2.14) | 0.75  |
|                            | - | + | 653/433                    | 2.65 (2.12,3.32) | $1.3 \times 10^{-17}$ | 492/433                     | 5.15 (3.86,6.87)  | $7.1 \times 10^{-29}$ | 161/433                    | 1.08 (0.81,1.45) | 0.61  |
|                            | + | + | 76/48                      | 2.2 (1.39,3.49)  | $7.8 \times 10^{-4}$  | 58/48                       | 4.62 (2.75,7.78)  | $8.4 \times 10^{-9}$  | 18/48                      | 0.81 (0.41,1.61) | 0.56  |
|                            |   |   | 0.16 (-0.26,0.58), p=0.46  |                  |                       | 0.05 (-0.4,0.5), p=0.83     |                   |                       | -0.46 (-1.76,0.83), p=0.48 |                  |       |
| Toluene                    |   |   |                            |                  |                       |                             |                   |                       |                            |                  |       |
|                            | - | - | 251/414                    | 1.00 ref         |                       | 102/414                     | 1.00 ref          |                       | 149/414                    | 1.00 ref         |       |
|                            | + | - | 17/8                       | 2.47 (0.94,6.52) | 0.067                 | 9/8                         | 3.86 (1.24,12.03) | 0.020                 | 8/8                        | 1.88 (0.6,5.88)  | 0.28  |
|                            | - | + | 653/433                    | 2.64 (2.11,3.3)  | $1.6 \times 10^{-17}$ | 492/433                     | 5.07 (3.81,6.76)  | $1.5 \times 10^{-28}$ | 161/433                    | 1.07 (0.8,1.44)  | 0.64  |
|                            | + | + | 40/15                      | 3.48 (1.73,6.97) | $4.5 \times 10^{-4}$  | 29/15                       | 7.1 (3.32,15.17)  | $4.2 \times 10^{-7}$  | 11/15                      | 1.42 (0.52,3.83) | 0.49  |
|                            |   |   | -0.18 (-1.21,0.84), p=0.73 |                  |                       | -0.12 (-1.1,0.86), p=0.81   |                   |                       | -0.38 (-2.33,1.58), p=0.7  |                  |       |
| Welding fume               |   |   |                            |                  |                       |                             |                   |                       |                            |                  |       |
|                            | - | - | 251/414                    | 1.00 ref         |                       | 102/414                     | 1.00 ref          |                       | 149/414                    | 1.00 ref         |       |
|                            | + | - | 22/29                      | 1.18 (0.6,2.34)  | 0.63                  | 6/29                        | 0.83 (0.29,2.39)  | 0.73                  | 16/29                      | 1.31 (0.6,2.84)  | 0.49  |
|                            | - | + | 653/433                    | 2.61 (2.09,3.26) | $2.5 \times 10^{-17}$ | 492/433                     | 5.02 (3.77,6.69)  | $2.0 \times 10^{-28}$ | 161/433                    | 1.08 (0.81,1.45) | 0.60  |
|                            | + | + | 73/25                      | 4.55 (2.59,8.02) | $1.5 \times 10^{-7}$  | 58/25                       | 9.82 (5.24,18.42) | $1.1 \times 10^{-12}$ | 15/25                      | 1.33 (0.59,3.02) | 0.49  |
|                            |   |   | 0.39 (0.03,0.74), p=0.035  |                  |                       | -0.99 (-2.14,0.17), p=0.093 |                   |                       | -0.04 (-1.08,1), p=0.94    |                  |       |
| Volatile sulphur compounds |   |   |                            |                  |                       |                             |                   |                       |                            |                  |       |

|                                                                               |   |                            |                  |                       |                            |                   |                       |                            |                  |      |
|-------------------------------------------------------------------------------|---|----------------------------|------------------|-----------------------|----------------------------|-------------------|-----------------------|----------------------------|------------------|------|
| -                                                                             | - | 251/414                    | 1.00 ref         |                       | 102/414                    | 1.00 ref          |                       | 149/414                    | 1.00 ref         |      |
| +                                                                             | - | 38/52                      | 0.86 (0.5,1.47)  | 0.57                  | 13/52                      | 0.64 (0.28,1.45)  | 0.28                  | 25/52                      | 0.92 (0.49,1.71) | 0.79 |
| -                                                                             | + | 653/433                    | 2.6 (2.08,3.25)  | $3.2 \times 10^{-17}$ | 492/433                    | 5.09 (3.82,6.78)  | $1.3 \times 10^{-28}$ | 161/433                    | 1.05 (0.79,1.41) | 0.74 |
| +                                                                             | + | 118/42                     | 4 (2.54,6.31)    | $2.4 \times 10^{-9}$  | 88/42                      | 8.13 (4.84,13.64) | $2.2 \times 10^{-15}$ | 30/42                      | 1.55 (0.85,2.85) | 0.15 |
|                                                                               |   | -0.59 (-1.28,0.09), p=0.09 |                  |                       | -0.67 (-1.44,0.1), p=0.089 |                   |                       | -0.55 (-1.56,0.45), p=0.28 |                  |      |
| <b>Other agents in correlation with any of the sixteen independent agents</b> |   |                            |                  |                       |                            |                   |                       |                            |                  |      |
| Wood dust                                                                     |   |                            |                  |                       |                            |                   |                       |                            |                  |      |
| -                                                                             | - | 251/414                    | 1.00 ref         |                       | 102/414                    | 1.00 ref          |                       | 149/414                    | 1.00 ref         |      |
| +                                                                             | - | 39/44                      | 1.4 (0.81,2.4)   | 0.23                  | 13/44                      | 1.21 (0.57,2.56)  | 0.62                  | 26/44                      | 1.45 (0.77,2.75) | 0.25 |
| -                                                                             | + | 653/433                    | 2.6 (2.08,3.24)  | $3.0 \times 10^{-17}$ | 492/433                    | 5.01 (3.76,6.66)  | $2.0 \times 10^{-28}$ | 161/433                    | 1.05 (0.79,1.41) | 0.73 |
| +                                                                             | + | 96/48                      | 3.22 (2.04,5.1)  | $5.6 \times 10^{-7}$  | 68/48                      | 6.53 (3.83,11.13) | $5.1 \times 10^{-12}$ | 28/48                      | 1.44 (0.78,2.63) | 0.24 |
|                                                                               |   | 0.07 (-0.36,0.5), p=0.75   |                  |                       | 0.2 (-0.19,0.6), p=0.32    |                   |                       | -0.05 (-0.84,0.74), p=0.91 |                  |      |
| Aliphatic and alicyclic hydrocarbon solvents                                  |   |                            |                  |                       |                            |                   |                       |                            |                  |      |
| -                                                                             | - | 251/414                    | 1.00 ref         |                       | 102/414                    | 1.00 ref          |                       | 149/414                    | 1.00 ref         |      |
| +                                                                             | - | 14/10                      | 1.52 (0.61,3.79) | 0.36                  | 7/10                       | 1.9 (0.62,5.83)   | 0.26                  | 7/10                       | 1.16 (0.39,3.49) | 0.79 |
| -                                                                             | + | 653/433                    | 2.63 (2.1,3.28)  | $2.2 \times 10^{-17}$ | 492/433                    | 5.09 (3.82,6.79)  | $1.4 \times 10^{-28}$ | 161/433                    | 1.07 (0.8,1.43)  | 0.65 |
| +                                                                             | + | 43/19                      | 3.24 (1.67,6.28) | $4.9 \times 10^{-4}$  | 30/19                      | 5.92 (2.82,12.44) | $2.7 \times 10^{-6}$  | 13/19                      | 1.82 (0.75,4.41) | 0.18 |
|                                                                               |   | 0.03 (-0.71,0.77), p=0.94  |                  |                       | -0.01 (-0.79,0.77), p=0.98 |                   |                       | 0.33 (-0.56,1.21), p=0.47  |                  |      |
| Animal dust                                                                   |   |                            |                  |                       |                            |                   |                       |                            |                  |      |
| -                                                                             | - | 251/414                    | 1.00 ref         |                       | 102/414                    | 1.00 ref          |                       | 149/414                    | 1.00 ref         |      |
| +                                                                             | - | 31/42                      | 0.88 (0.49,1.58) | 0.67                  | 10/42                      | 0.68 (0.28,1.68)  | 0.40                  | 21/42                      | 0.9 (0.45,1.78)  | 0.76 |
| -                                                                             | + | 653/433                    | 2.62 (2.09,3.27) | $2.4 \times 10^{-17}$ | 492/433                    | 5.09 (3.82,6.78)  | $1.3 \times 10^{-28}$ | 161/433                    | 1.06 (0.79,1.41) | 0.71 |
| +                                                                             | + | 87/46                      | 3.12 (1.97,4.94) | $1.2 \times 10^{-6}$  | 63/46                      | 5.67 (3.37,9.54)  | $6.4 \times 10^{-11}$ | 24/46                      | 1.46 (0.78,2.72) | 0.23 |
|                                                                               |   | -0.24 (-0.79,0.32), p=0.4  |                  |                       | -0.18 (-0.73,0.37), p=0.53 |                   |                       | -0.48 (-1.49,0.54), p=0.36 |                  |      |
| Aromatic hydrocarbon solvents                                                 |   |                            |                  |                       |                            |                   |                       |                            |                  |      |
| -                                                                             | - | 251/414                    | 1.00 ref         |                       | 102/414                    | 1.00 ref          |                       | 149/414                    | 1.00 ref         |      |
| +                                                                             | - | 18/11                      | 1.78 (0.75,4.21) | 0.19                  | 10/11                      | 2.82 (1.02,7.81)  | 0.046                 | 8/11                       | 1.22 (0.43,3.52) | 0.71 |
| -                                                                             | + | 653/433                    | 2.63 (2.11,3.29) | $1.8 \times 10^{-17}$ | 492/433                    | 5.08 (3.81,6.77)  | $1.5 \times 10^{-28}$ | 161/433                    | 1.07 (0.8,1.43)  | 0.64 |
| +                                                                             | + | 46/18                      | 3.48 (1.8,6.73)  | $2.1 \times 10^{-4}$  | 32/18                      | 6.78 (3.27,14.09) | $2.8 \times 10^{-7}$  | 14/18                      | 1.69 (0.68,4.16) | 0.26 |
|                                                                               |   | 0.02 (-0.72,0.76), p=0.96  |                  |                       | -0.02 (-0.81,0.77), p=0.97 |                   |                       | 0.23 (-0.76,1.22), p=0.65  |                  |      |
| Benzo(a)pyrene                                                                |   |                            |                  |                       |                            |                   |                       |                            |                  |      |
| -                                                                             | - | 251/414                    | 1.00 ref         |                       | 102/414                    | 1.00 ref          |                       | 149/414                    | 1.00 ref         |      |
| +                                                                             | - | 58/68                      | 1.14 (0.71,1.82) | 0.58                  | 20/68                      | 1.13 (0.6,2.13)   | 0.71                  | 38/68                      | 1.11 (0.63,1.96) | 0.72 |
| -                                                                             | + | 653/433                    | 2.59 (2.07,3.23) | $4.1 \times 10^{-17}$ | 492/433                    | 4.98 (3.75,6.62)  | $2.1 \times 10^{-28}$ | 161/433                    | 1.06 (0.79,1.41) | 0.71 |
| +                                                                             | + | 171/78                     | 3.21 (2.17,4.73) | $4.7 \times 10^{-9}$  | 134/78                     | 6.47 (4.14,10.11) | $2.7 \times 10^{-16}$ | 37/78                      | 1.07 (0.62,1.84) | 0.80 |

|                       |   |         |                            |  |         |                             |  |         |                            |  |  |
|-----------------------|---|---------|----------------------------|--|---------|-----------------------------|--|---------|----------------------------|--|--|
|                       |   |         | 0.15 (-0.17,0.47), p=0.36  |  |         | 0.21 (-0.1,0.52), p=0.19    |  |         | -0.09 (-0.81,0.64), p=0.82 |  |  |
| Chromium              |   |         |                            |  |         |                             |  |         |                            |  |  |
| -                     | - | 251/414 | 1.00 ref                   |  | 102/414 | 1.00 ref                    |  | 149/414 | 1.00 ref                   |  |  |
| +                     | - | 13/29   | 0.66 (0.3,1.46)            |  | 5/29    | 0.84 (0.29,2.42)            |  | 8/29    | 0.53 (0.19,1.46)           |  |  |
| -                     | + | 653/433 | 2.6 (2.08,3.25)            |  | 492/433 | 5.02 (3.77,6.68)            |  | 161/433 | 1.07 (0.8,1.43)            |  |  |
| +                     | + | 49/16   | 4.37 (2.26,8.45)           |  | 38/16   | 9.46 (4.65,19.26)           |  | 11/16   | 1.26 (0.48,3.32)           |  |  |
|                       |   |         | -0.81 (-1.9,0.29), p=0.15  |  |         | -0.92 (-2.2,0.37), p=0.16   |  |         | -0.61 (-1.85,0.62), p=0.33 |  |  |
| Diesel engine exhaust |   |         |                            |  |         |                             |  |         |                            |  |  |
| -                     | - | 251/414 | 1.00 ref                   |  | 102/414 | 1.00 ref                    |  | 149/414 | 1.00 ref                   |  |  |
| +                     | - | 59/68   | 1.36 (0.86,2.16)           |  | 21/68   | 1.29 (0.69,2.42)            |  | 38/68   | 1.35 (0.79,2.31)           |  |  |
| -                     | + | 653/433 | 2.57 (2.06,3.21)           |  | 492/433 | 5.03 (3.78,6.69)            |  | 161/433 | 1.05 (0.78,1.4)            |  |  |
| +                     | + | 193/74  | 3.79 (2.6,5.54)            |  | 149/74  | 8.11 (5.24,12.56)           |  | 44/74   | 1.35 (0.81,2.25)           |  |  |
|                       |   |         | 0.23 (-0.07,0.52), p=0.13  |  |         | 0.34 (0.09,0.6), p=0.0089   |  |         | -0.04 (-0.69,0.62), p=0.91 |  |  |
| Hardwood dust         |   |         |                            |  |         |                             |  |         |                            |  |  |
| -                     | - | 251/414 | 1.00 ref                   |  | 102/414 | 1.00 ref                    |  | 149/414 | 1.00 ref                   |  |  |
| +                     | - | 39/44   | 1.39 (0.81,2.39)           |  | 13/44   | 1.2 (0.57,2.54)             |  | 26/44   | 1.45 (0.77,2.75)           |  |  |
| -                     | + | 653/433 | 2.6 (2.08,3.24)            |  | 492/433 | 5.01 (3.76,6.66)            |  | 161/433 | 1.05 (0.79,1.41)           |  |  |
| +                     | + | 95/48   | 3.17 (2.5,5.02)            |  | 67/48   | 6.38 (3.73,10.91)           |  | 28/48   | 1.44 (0.78,2.63)           |  |  |
|                       |   |         | 0.06 (-0.38,0.5), p=0.8    |  |         | 0.18 (-0.22,0.59), p=0.38   |  |         | -0.05 (-0.84,0.74), p=0.91 |  |  |
| Herbicides            |   |         |                            |  |         |                             |  |         |                            |  |  |
| -                     | - | 251/414 | 1.00 ref                   |  | 102/414 | 1.00 ref                    |  | 149/414 | 1.00 ref                   |  |  |
| +                     | - | 18/31   | 0.72 (0.34,1.52)           |  | 6/31    | 0.42 (0.11,1.58)            |  | 12/31   | 0.77 (0.33,1.77)           |  |  |
| -                     | + | 653/433 | 2.61 (2.09,3.26)           |  | 492/433 | 5.06 (3.8,6.75)             |  | 161/433 | 1.06 (0.79,1.41)           |  |  |
| +                     | + | 47/28   | 2.8 (1.57,4.99)            |  | 33/28   | 5.17 (2.69,9.93)            |  | 14/28   | 1.26 (0.57,2.79)           |  |  |
|                       |   |         | -0.18 (-0.81,0.45), p=0.58 |  |         | -0.13 (-0.78,0.51), p=0.68  |  |         | -0.41 (-1.51,0.7), p=0.47  |  |  |
| Insecticides          |   |         |                            |  |         |                             |  |         |                            |  |  |
| -                     | - | 251/414 | 1.00 ref                   |  | 102/414 | 1.00 ref                    |  | 149/414 | 1.00 ref                   |  |  |
| +                     | - | 11/15   | 0.86 (0.34,2.19)           |  | 4/15    | 0.31 (0.04,2.47)            |  | 7/15    | 1.33 (0.49,3.6)            |  |  |
| -                     | + | 653/433 | 2.62 (2.1,3.27)            |  | 492/433 | 5.04 (3.78,6.71)            |  | 161/433 | 1.07 (0.8,1.43)            |  |  |
| +                     | + | 33/4    | 13.67 (4.58,40.78)         |  | 27/4    | 30.57 (9.76,95.76)          |  | 6/4     | 4.47 (1.1,18.14)           |  |  |
|                       |   |         | -4.27 (-9.94,1.4), p=0.14  |  |         | -5.21 (-12.04,1.62), p=0.14 |  |         | 0.69 (0.16,1.21), p=0.01   |  |  |
| Iron                  |   |         |                            |  |         |                             |  |         |                            |  |  |
| -                     | - | 251/414 | 1.00 ref                   |  | 102/414 | 1.00 ref                    |  | 149/414 | 1.00 ref                   |  |  |
| +                     | - | 86/96   | 1.28 (0.86,1.93)           |  | 28/96   | 1.13 (0.64,1.98)            |  | 58/96   | 1.36 (0.84,2.21)           |  |  |
| -                     | + | 653/433 | 2.59 (2.07,3.23)           |  | 492/433 | 4.96 (3.74,6.6)             |  | 161/433 | 1.08 (0.81,1.44)           |  |  |

|                                  |   |   |         |                            |                       |         |                            |                       |         |                            |       |
|----------------------------------|---|---|---------|----------------------------|-----------------------|---------|----------------------------|-----------------------|---------|----------------------------|-------|
|                                  | + | + | 271/102 | 3.88 (2.73,5.52)           | $3.9 \times 10^{-14}$ | 211/102 | 7.68 (5.11,11.56)          | $1.2 \times 10^{-22}$ | 60/102  | 1.35 (0.84,2.16)           | 0.22  |
|                                  |   |   |         | 0.26 (0.02,0.51), p=0.037  |                       |         | 0.34 (0.1,0.57), p=0.0047  |                       |         | -0.07 (-0.65,0.51), p=0.82 |       |
| Manmade mineral fibres           |   |   |         |                            |                       |         |                            |                       |         |                            |       |
|                                  | - | - | 251/414 | 1.00 ref                   |                       | 102/414 | 1.00 ref                   |                       | 149/414 | 1.00 ref                   |       |
|                                  | + | - | 31/30   | 1.48 (0.78,2.82)           | 0.23                  | 13/30   | 1.84 (0.81,4.17)           | 0.15                  | 18/30   | 1.29 (0.6,2.81)            | 0.52  |
|                                  | - | + | 653/433 | 2.61 (2.09,3.26)           | $2.1 \times 10^{-17}$ | 492/433 | 4.98 (3.75,6.63)           | $2.3 \times 10^{-28}$ | 161/433 | 1.07 (0.8,1.43)            | 0.67  |
|                                  | + | + | 84/41   | 3.48 (2.09,5.81)           | $1.7 \times 10^{-6}$  | 61/41   | 7.23 (4.02,12.99)          | $3.7 \times 10^{-11}$ | 23/41   | 1.33 (0.66,2.65)           | 0.42  |
|                                  |   |   |         | 0.11 (-0.35,0.57), p=0.64  |                       |         | 0.19 (-0.25,0.63), p=0.39  |                       |         | -0.03 (-0.92,0.87), p=0.96 |       |
| Other organic solvents           |   |   |         |                            |                       |         |                            |                       |         |                            |       |
|                                  | - | - | 251/414 | 1.00 ref                   |                       | 102/414 | 1.00 ref                   |                       | 149/414 | 1.00 ref                   |       |
|                                  | + | - | 14/10   | 1.52 (0.61,3.79)           | 0.36                  | 7/10    | 1.9 (0.62,5.83)            | 0.26                  | 7/10    | 1.16 (0.39,3.49)           | 0.79  |
|                                  | - | + | 653/433 | 2.63 (2.1,3.28)            | $2.2 \times 10^{-17}$ | 492/433 | 5.09 (3.82,6.79)           | $1.4 \times 10^{-28}$ | 161/433 | 1.07 (0.8,1.43)            | 0.65  |
|                                  | + | + | 43/19   | 3.24 (1.67,6.28)           | $4.9 \times 10^{-4}$  | 30/19   | 5.92 (2.82,12.44)          | $2.7 \times 10^{-6}$  | 13/19   | 1.82 (0.75,4.41)           | 0.18  |
|                                  |   |   |         | 0.03 (-0.71,0.77), p=0.94  |                       |         | -0.01 (-0.79,0.77), p=0.98 |                       |         | 0.33 (-0.56,1.21), p=0.47  |       |
| Plant dust                       |   |   |         |                            |                       |         |                            |                       |         |                            |       |
|                                  | - | - | 251/414 | 1.00 ref                   |                       | 102/414 | 1.00 ref                   |                       | 149/414 | 1.00 ref                   |       |
|                                  | + | - | 32/49   | 0.82 (0.46,1.43)           | 0.48                  | 10/49   | 0.54 (0.22,1.32)           | 0.18                  | 22/49   | 0.89 (0.47,1.7)            | 0.73  |
|                                  | - | + | 653/433 | 2.61 (2.09,3.26)           | $2.7 \times 10^{-17}$ | 492/433 | 5.1 (3.82,6.8)             | $1.3 \times 10^{-28}$ | 161/433 | 1.05 (0.79,1.41)           | 0.74  |
|                                  | + | + | 93/44   | 3.19 (2.01,5.08)           | $9.5 \times 10^{-7}$  | 69/44   | 6.41 (3.78,10.85)          | $4.9 \times 10^{-12}$ | 24/44   | 1.27 (0.67,2.42)           | 0.46  |
|                                  |   |   |         | -0.29 (-0.86,0.27), p=0.31 |                       |         | -0.35 (-0.97,0.28), p=0.27 |                       |         | -0.31 (-1.22,0.6), p=0.5   |       |
| Polycyclic aromatic hydrocarbons |   |   |         |                            |                       |         |                            |                       |         |                            |       |
|                                  | - | - | 251/414 | 1.00 ref                   |                       | 102/414 | 1.00 ref                   |                       | 149/414 | 1.00 ref                   |       |
|                                  | + | - | 64/78   | 1.1 (0.71,1.72)            | 0.66                  | 21/78   | 1.05 (0.57,1.94)           | 0.88                  | 43/78   | 1.11 (0.65,1.89)           | 0.71  |
|                                  | - | + | 653/433 | 2.58 (2.07,3.22)           | $5.2 \times 10^{-17}$ | 492/433 | 4.95 (3.73,6.58)           | $2.6 \times 10^{-28}$ | 161/433 | 1.06 (0.79,1.42)           | 0.69  |
|                                  | + | + | 205/85  | 3.47 (2.38,5.04)           | $7.4 \times 10^{-11}$ | 160/85  | 7.01 (4.56,10.78)          | $7.0 \times 10^{-19}$ | 45/85   | 1.16 (0.69,1.92)           | 0.58  |
|                                  |   |   |         | 0.23 (-0.05,0.51), p=0.11  |                       |         | 0.29 (0.01,0.56), p=0.039  |                       |         | -0.01 (-0.65,0.63), p=0.97 |       |
| Stone and concrete               |   |   |         |                            |                       |         |                            |                       |         |                            |       |
|                                  | - | - | 251/414 | 1.00 ref                   |                       | 102/414 | 1.00 ref                   |                       | 149/414 | 1.00 ref                   |       |
|                                  | + | - | 91/109  | 1.26 (0.84,1.88)           | 0.26                  | 32/109  | 1.16 (0.67,2)              | 0.60                  | 59/109  | 1.31 (0.82,2.08)           | 0.26  |
|                                  | - | + | 653/433 | 2.58 (2.07,3.22)           | $4.1 \times 10^{-17}$ | 492/433 | 5 (3.76,6.65)              | $1.8 \times 10^{-28}$ | 161/433 | 1.05 (0.78,1.39)           | 0.76  |
|                                  | + | + | 296/116 | 3.83 (2.72,5.38)           | $1.2 \times 10^{-14}$ | 219/116 | 7.53 (5.03,11.28)          | $9.9 \times 10^{-23}$ | 77/116  | 1.56 (1.01,2.43)           | 0.047 |
|                                  |   |   |         | 0.26 (0.02,0.49), p=0.033  |                       |         | 0.32 (0.08,0.55), p=0.0086 |                       |         | 0.14 (-0.31,0.58), p=0.55  |       |

**Supplementary Table 9. Additive interaction effects between occupational inhalable agents and smoking on the development of RA.** Estimates were adjusted for age, sex, residential area, alcohol drinking, levels of education, and body mass index.

| Occupational exposure                 | Smoking | Overall RA                 |                  |                       | ACPA-positive subtype      |                  |                       | ACPA-negative subtype      |                  |                      |
|---------------------------------------|---------|----------------------------|------------------|-----------------------|----------------------------|------------------|-----------------------|----------------------------|------------------|----------------------|
|                                       |         | N<br>(case / control)      | OR (95%CI)       | P                     | N<br>(case / control)      | OR (95%CI)       | P                     | N<br>(case / control)      | OR (95%CI)       | P                    |
| Exposed to any agents                 |         |                            |                  |                       |                            |                  |                       |                            |                  |                      |
| -                                     | -       | 430/1032                   | 1.00 ref         |                       | 251/1032                   | 1.00 ref         |                       | 179/1032                   | 1.00 ref         |                      |
| -                                     | +       | 900/1919                   | 1.09 (0.94,1.25) | 0.25                  | 540/1919                   | 1.13 (0.96,1.34) | 0.15                  | 360/1919                   | 1.01 (0.83,1.23) | 0.94                 |
| +                                     | -       | 668/1082                   | 1.49 (1.28,1.73) | 2.0×10 <sup>-7</sup>  | 463/1082                   | 1.8 (1.51,2.15)  | 1.2×10 <sup>-10</sup> | 205/1082                   | 1.07 (0.86,1.34) | 0.52                 |
| +                                     | +       | 2035/2452                  | 1.95 (1.71,2.22) | 7.6×10 <sup>-24</sup> | 1388/2452                  | 2.37 (2.02,2.77) | 6.0×10 <sup>-27</sup> | 647/2452                   | 1.42 (1.18,1.71) | 1.8×10 <sup>-4</sup> |
| AP (95%CI), P                         |         | 0.19 (0.08,0.31), P=0.0011 |                  |                       | 0.18 (0.06,0.31), P=0.0043 |                  |                       | 0.24 (0.05,0.43), P=0.014  |                  |                      |
| <b>The sixteen independent agents</b> |         |                            |                  |                       |                            |                  |                       |                            |                  |                      |
| Asbestos                              |         |                            |                  |                       |                            |                  |                       |                            |                  |                      |
| -                                     | -       | 430/1032                   | 1.00 ref         |                       | 251/1032                   | 1.00 ref         |                       | 179/1032                   | 1.00 ref         |                      |
| +                                     | -       | 28/35                      | 2.03 (1.18,3.49) | 0.010                 | 17/35                      | 2.74 (1.44,5.18) | 2.0×10 <sup>-3</sup>  | 11/35                      | 1.35 (0.65,2.82) | 0.42                 |
| -                                     | +       | 668/1082                   | 1.51 (1.29,1.76) | 1.7×10 <sup>-7</sup>  | 463/1082                   | 1.87 (1.55,2.25) | 4.1×10 <sup>-11</sup> | 205/1082                   | 1.06 (0.85,1.33) | 0.59                 |
| +                                     | +       | 115/95                     | 2.96 (2.11,4.16) | 3.5×10 <sup>-10</sup> | 71/95                      | 3.89 (2.6,5.83)  | 4.0×10 <sup>-11</sup> | 44/95                      | 2.02 (1.29,3.17) | 2.2×10 <sup>-3</sup> |
| AP (95%CI), P                         |         | 0.14 (-0.28,0.57), p=0.51  |                  |                       | 0.07 (-0.44,0.59), p=0.78  |                  |                       | 0.3 (-0.24,0.84), p=0.28   |                  |                      |
| Cadmium                               |         |                            |                  |                       |                            |                  |                       |                            |                  |                      |
| -                                     | -       | 430/1032                   | 1.00 ref         |                       | 251/1032                   | 1.00 ref         |                       | 179/1032                   | 1.00 ref         |                      |
| +                                     | -       | 7/15                       | 0.92 (0.36,2.34) | 0.86                  | 5/15                       | 1.26 (0.44,3.58) | 0.66                  | 2/15                       | 0.58 (0.12,2.66) | 0.48                 |
| -                                     | +       | 668/1082                   | 1.51 (1.29,1.76) | 1.8×10 <sup>-7</sup>  | 463/1082                   | 1.87 (1.55,2.25) | 4.6×10 <sup>-11</sup> | 205/1082                   | 1.07 (0.85,1.34) | 0.58                 |
| +                                     | +       | 22/26                      | 1.78 (0.97,3.26) |                       | 17/26                      | 2.6 (1.34,5.03)  | 4.5×10 <sup>-3</sup>  | 5/26                       | 0.9 (0.33,2.47)  | 0.84                 |
| AP (95%CI), P                         |         | -0.23 (-1.13,0.67), p=0.61 |                  |                       | 0.18 (-0.54,0.91), p=0.62  |                  |                       | -0.25 (-1.44,0.95), p=0.69 |                  |                      |
| Carbon monoxide                       |         |                            |                  |                       |                            |                  |                       |                            |                  |                      |
| -                                     | -       | 430/1032                   | 1.00 ref         |                       | 251/1032                   | 1.00 ref         |                       | 179/1032                   | 1.00 ref         |                      |
| +                                     | -       | 125/233                    | 1.25 (0.95,1.64) | 0.11                  | 76/233                     | 1.44 (1.04,2)    | 0.030                 | 49/233                     | 1.05 (0.72,1.55) | 0.79                 |
| -                                     | +       | 668/1082                   | 1.51 (1.29,1.76) | 1.5×10 <sup>-7</sup>  | 463/1082                   | 1.84 (1.53,2.21) | 6.8×10 <sup>-11</sup> | 205/1082                   | 1.08 (0.86,1.35) | 0.51                 |
| +                                     | +       | 452/422                    | 2.5 (2.04,3.08)  | 2.7×10 <sup>-18</sup> | 309/422                    | 3.25 (2.55,4.15) | 2.3×10 <sup>-21</sup> | 143/422                    | 1.64 (1.23,2.2)  | 9.0×10 <sup>-4</sup> |
| AP (95%CI), P                         |         | 0.3 (0.14,0.46), p=0.00035 |                  |                       | 0.3 (0.12,0.47), p=0.00098 |                  |                       | 0.31 (0.03,0.59), p=0.03   |                  |                      |
| Detergents                            |         |                            |                  |                       |                            |                  |                       |                            |                  |                      |
| -                                     | -       | 430/1032                   | 1.00 ref         |                       | 251/1032                   | 1.00 ref         |                       | 179/1032                   | 1.00 ref         |                      |
| +                                     | -       | 571/1222                   | 1.04 (0.89,1.21) | 0.60                  | 342/1222                   | 1.07 (0.89,1.29) | 0.45                  | 229/1222                   | 0.99 (0.79,1.23) | 0.89                 |

|                         |               |   |                               |                  |                       |                              |                  |                       |                              |                  |                      |
|-------------------------|---------------|---|-------------------------------|------------------|-----------------------|------------------------------|------------------|-----------------------|------------------------------|------------------|----------------------|
|                         | -             | + | 668/1082                      | 1.49 (1.28,1.73) | $2.2 \times 10^{-7}$  | 463/1082                     | 1.79 (1.5,2.15)  | $1.8 \times 10^{-10}$ | 205/1082                     | 1.08 (0.87,1.35) | 0.49                 |
|                         | +             | + | 1409/1570                     | 2.06 (1.8,2.37)  | $3.1 \times 10^{-25}$ | 966/1570                     | 2.48 (2.11,2.92) | $1.7 \times 10^{-27}$ | 443/1570                     | 1.53 (1.26,1.87) | $1.7 \times 10^{-5}$ |
|                         | AP (95%CI), P |   | 0.26 (0.14,0.37), p=0.000014  |                  |                       | 0.25 (0.12,0.37), p=0.00013  |                  |                       | -0.43 (-0.76,-0.1), p=0.01   |                  |                      |
| Flour dust              |               |   |                               |                  |                       |                              |                  |                       |                              |                  |                      |
|                         | -             | - | 430/1032                      | 1.00 ref         |                       | 251/1032                     | 1.00 ref         |                       | 179/1032                     | 1.00 ref         |                      |
|                         | +             | - | 14/18                         | 1.74 (0.83,3.64) | 0.14                  | 7/18                         | 1.76 (0.7,4.44)  | 0.23                  | 7/18                         | 1.53 (0.6,3.93)  | 0.37                 |
|                         | -             | + | 668/1082                      | 1.51 (1.29,1.76) | $1.7 \times 10^{-7}$  | 463/1082                     | 1.86 (1.54,2.24) | $5.3 \times 10^{-11}$ | 205/1082                     | 1.07 (0.86,1.35) | 0.54                 |
|                         | +             | + | 21/26                         | 1.71 (0.93,3.15) | 0.080                 | 13/26                        | 2.2 (1.08,4.48)  | 0.030                 | 8/26                         | 1.12 (0.48,2.65) | 0.79                 |
|                         | AP (95%CI), P |   | -0.31 (-1.38,0.75), p=0.57    |                  |                       | -0.19 (-1.29,0.9), p=0.73    |                  |                       | -0.43 (-2.15,1.29), p=0.62   |                  |                      |
| Fungicides              |               |   |                               |                  |                       |                              |                  |                       |                              |                  |                      |
|                         | -             | - | 430/1032                      | 1.00 ref         |                       | 251/1032                     | 1.00 ref         |                       | 179/1032                     | 1.00 ref         |                      |
|                         | +             | - | 14/20                         | 1.45 (0.7,2.98)  | 0.32                  | 9/20                         | 1.74 (0.75,4.01) | 0.20                  | 5/20                         | 1.1 (0.39,3.11)  | 0.85                 |
|                         | -             | + | 668/1082                      | 1.51 (1.29,1.76) | $1.7 \times 10^{-7}$  | 463/1082                     | 1.87 (1.55,2.25) | $4.1 \times 10^{-11}$ | 205/1082                     | 1.07 (0.85,1.34) | 0.57                 |
|                         | +             | + | 36/22                         | 3.95 (2.25,6.91) | $1.6 \times 10^{-6}$  | 25/22                        | 5.27 (2.85,9.75) | $1.2 \times 10^{-7}$  | 11/22                        | 2.61 (1.2,5.67)  | 0.020                |
|                         | AP (95%CI), P |   | 0.5 (0.13,0.88), p=0.0088     |                  |                       | 0.51 (0.11,0.91), p=0.013    |                  |                       | 0.55 (0,1.1), p=0.051        |                  |                      |
| Gasoline engine exhaust |               |   |                               |                  |                       |                              |                  |                       |                              |                  |                      |
|                         | -             | - | 430/1032                      | 1.00 ref         |                       | 251/1032                     | 1.00 ref         |                       | 179/1032                     | 1.00 ref         |                      |
|                         | +             | - | 22/50                         | 0.96 (0.56,1.65) | 0.88                  | 11/50                        | 0.97 (0.48,1.95) | 0.93                  | 11/50                        | 0.88 (0.43,1.8)  | 0.72                 |
|                         | -             | + | 668/1082                      | 1.5 (1.29,1.75)  | $2.6 \times 10^{-7}$  | 463/1082                     | 1.85 (1.54,2.22) | $7.6 \times 10^{-11}$ | 205/1082                     | 1.06 (0.85,1.33) | 0.60                 |
|                         | +             | + | 94/76                         | 2.72 (1.9,3.91)  | $4.9 \times 10^{-8}$  | 64/76                        | 4.07 (2.7,6.13)  | $2.3 \times 10^{-11}$ | 30/76                        | 1.5 (0.9,2.49)   | 0.12                 |
|                         | AP (95%CI), P |   | -0.84 (-1.55,-0.14), p=0.018  |                  |                       | -1.22 (-2.13,-0.3), p=0.0093 |                  |                       | -0.53 (-1.41,0.36), p=0.24   |                  |                      |
| Lead                    |               |   |                               |                  |                       |                              |                  |                       |                              |                  |                      |
|                         | -             | - | 430/1032                      | 1.00 ref         |                       | 251/1032                     | 1.00 ref         |                       | 179/1032                     | 1.00 ref         |                      |
|                         | +             | - | 39/67                         | 1.29 (0.84,1.99) | 0.24                  | 27/67                        | 1.71 (1.05,2.8)  | 0.030                 | 12/67                        | 0.8 (0.42,1.56)  | 0.52                 |
|                         | -             | + | 668/1082                      | 1.5 (1.29,1.75)  | $2.5 \times 10^{-7}$  | 463/1082                     | 1.85 (1.54,2.22) | $6.4 \times 10^{-11}$ | 205/1082                     | 1.05 (0.84,1.32) | 0.64                 |
|                         | +             | + | 97/138                        | 1.62 (1.2,2.2)   | $1.9 \times 10^{-3}$  | 68/138                       | 2.25 (1.58,3.2)  | $6.6 \times 10^{-6}$  | 29/138                       | 0.94 (0.59,1.49) | 0.78                 |
|                         | AP (95%CI), P |   | -0.11 (-0.55,0.34), p=0.65    |                  |                       | -0.14 (-0.64,0.36), p=0.58   |                  |                       | -0.07 (-0.71,0.57), p=0.82   |                  |                      |
| Oil mist                |               |   |                               |                  |                       |                              |                  |                       |                              |                  |                      |
|                         | -             | - | 430/1032                      | 1.00 ref         |                       | 251/1032                     | 1.00 ref         |                       | 179/1032                     | 1.00 ref         |                      |
|                         | +             | - | 23/66                         | 0.74 (0.44,1.23) | 0.25                  | 15/66                        | 0.96 (0.52,1.76) | 0.90                  | 8/66                         | 0.49 (0.22,1.07) | 0.070                |
|                         | -             | + | 668/1082                      | 1.51 (1.29,1.76) | $1.6 \times 10^{-7}$  | 463/1082                     | 1.86 (1.54,2.24) | $5.0 \times 10^{-11}$ | 205/1082                     | 1.07 (0.86,1.34) | 0.54                 |
|                         | +             | + | 110/95                        | 2.78 (1.99,3.87) | $1.6 \times 10^{-9}$  | 75/95                        | 3.84 (2.62,5.62) | $5.0 \times 10^{-12}$ | 35/95                        | 1.68 (1.05,2.68) | 0.030                |
|                         | AP (95%CI), P |   | -1.01 (-1.65,-0.38), p=0.0017 |                  |                       | -1.09 (-1.88,-0.3), p=0.0071 |                  |                       | -1.05 (-1.86,-0.23), p=0.012 |                  |                      |

## Pulp or paper dust

|               |   |                         |                  |                      |                           |                  |                       |                            |                  |      |  |
|---------------|---|-------------------------|------------------|----------------------|---------------------------|------------------|-----------------------|----------------------------|------------------|------|--|
| -             | - | 430/1032                | 1.00 ref         |                      | 251/1032                  | 1.00 ref         |                       | 179/1032                   | 1.00 ref         |      |  |
| +             | - | 76/128                  | 1.33 (0.97,1.83) | 0.080                | 50/128                    | 1.57 (1.08,2.28) | 0.020                 | 26/128                     | 0.98 (0.61,1.57) | 0.94 |  |
| -             | + | 668/1082                | 1.51 (1.29,1.76) | $1.5 \times 10^{-7}$ | 463/1082                  | 1.87 (1.55,2.25) | $3.0 \times 10^{-11}$ | 205/1082                   | 1.06 (0.84,1.32) | 0.64 |  |
| +             | + | 163/180                 | 2.09 (1.63,2.7)  | $9.3 \times 10^{-9}$ | 123/180                   | 2.94 (2.21,3.91) | $1.1 \times 10^{-13}$ | 40/180                     | 1.11 (0.74,1.65) | 0.62 |  |
| AP (95%CI), P |   | 0.12 (-0.16,0.4), p=0.4 |                  |                      | 0.17 (-0.11,0.45), p=0.23 |                  |                       | -0.06 (-0.65,0.52), p=0.83 |                  |      |  |

## Quartz dust

|               |   |                            |                  |                       |                          |                  |                       |                          |                  |                      |  |
|---------------|---|----------------------------|------------------|-----------------------|--------------------------|------------------|-----------------------|--------------------------|------------------|----------------------|--|
| -             | - | 430/1032                   | 1.00 ref         |                       | 251/1032                 | 1.00 ref         |                       | 179/1032                 | 1.00 ref         |                      |  |
| +             | - | 51/70                      | 1.78 (1.17,2.69) | $6.6 \times 10^{-3}$  | 29/70                    | 2.05 (1.24,3.39) | $5.0 \times 10^{-3}$  | 22/70                    | 1.44 (0.82,2.51) | 0.20                 |  |
| -             | + | 668/1082                   | 1.5 (1.29,1.75)  | $2.5 \times 10^{-7}$  | 463/1082                 | 1.85 (1.54,2.23) | $5.3 \times 10^{-11}$ | 205/1082                 | 1.05 (0.84,1.32) | 0.66                 |  |
| +             | + | 192/151                    | 3.07 (2.3,4.09)  | $3.3 \times 10^{-14}$ | 125/151                  | 4.13 (2.94,5.81) | $3.4 \times 10^{-16}$ | 67/151                   | 1.96 (1.32,2.92) | $9.1 \times 10^{-4}$ |  |
| AP (95%CI), P |   | 0.26 (-0.02,0.53), p=0.064 |                  |                       | 0.3 (0.01,0.58), p=0.041 |                  |                       | 0.24 (-0.2,0.68), p=0.28 |                  |                      |  |

## Softwood dust

|               |   |                           |                  |                      |                          |                  |                       |                          |                  |       |  |
|---------------|---|---------------------------|------------------|----------------------|--------------------------|------------------|-----------------------|--------------------------|------------------|-------|--|
| -             | - | 430/1032                  | 1.00 ref         |                      | 251/1032                 | 1.00 ref         |                       | 179/1032                 | 1.00 ref         |       |  |
| +             | - | 45/82                     | 1.31 (0.87,1.98) | 0.20                 | 24/82                    | 1.39 (0.83,2.34) | 0.21                  | 21/82                    | 1.17 (0.67,2.03) | 0.58  |  |
| -             | + | 668/1082                  | 1.51 (1.29,1.76) | $1.6 \times 10^{-7}$ | 463/1082                 | 1.86 (1.55,2.24) | $4.0 \times 10^{-11}$ | 205/1082                 | 1.07 (0.85,1.34) | 0.58  |  |
| +             | + | 117/118                   | 2.33 (1.7,3.2)   | $1.6 \times 10^{-7}$ | 75/118                   | 3.06 (2.11,4.44) | $3.5 \times 10^{-9}$  | 42/118                   | 1.55 (1.2,4)     | 0.050 |  |
| AP (95%CI), P |   | 0.22 (-0.08,0.52), p=0.16 |                  |                      | 0.26 (-0.05,0.58), p=0.1 |                  |                       | 0.2 (-0.29,0.69), p=0.42 |                  |       |  |

## Textile dust

|               |   |                           |                  |                      |                            |                  |                       |                            |                  |      |  |
|---------------|---|---------------------------|------------------|----------------------|----------------------------|------------------|-----------------------|----------------------------|------------------|------|--|
| -             | - | 430/1032                  | 1.00 ref         |                      | 251/1032                   | 1.00 ref         |                       | 179/1032                   | 1.00 ref         |      |  |
| +             | - | 33/66                     | 0.91 (0.58,1.44) | 0.70                 | 16/66                      | 0.8 (0.45,1.45)  | 0.47                  | 17/66                      | 1.06 (0.58,1.93) | 0.85 |  |
| -             | + | 668/1082                  | 1.51 (1.3,1.77)  | $1.3 \times 10^{-7}$ | 463/1082                   | 1.86 (1.55,2.24) | $4.2 \times 10^{-11}$ | 205/1082                   | 1.08 (0.86,1.35) | 0.51 |  |
| +             | + | 85/103                    | 1.62 (1.17,2.25) | $3.8 \times 10^{-3}$ | 60/103                     | 2.17 (1.5,3.14)  | $4.3 \times 10^{-5}$  | 25/103                     | 1.03 (0.63,1.68) | 0.92 |  |
| AP (95%CI), P |   | -0.13 (-0.56,0.3), p=0.56 |                  |                      | -0.27 (-0.75,0.21), p=0.27 |                  |                       | -0.11 (-0.91,0.68), p=0.78 |                  |      |  |

## Toluene

|               |   |                          |                  |                      |                           |                  |                       |                           |                  |       |  |
|---------------|---|--------------------------|------------------|----------------------|---------------------------|------------------|-----------------------|---------------------------|------------------|-------|--|
| -             | - | 430/1032                 | 1.00 ref         |                      | 251/1032                  | 1.00 ref         |                       | 179/1032                  | 1.00 ref         |       |  |
| +             | - | 18/25                    | 1.75 (0.92,3.31) | 0.090                | 14/25                     | 2.65 (1.32,5.32) | $6.0 \times 10^{-3}$  | 4/25                      | 0.74 (0.25,2.24) | 0.60  |  |
| -             | + | 668/1082                 | 1.51 (1.29,1.76) | $1.7 \times 10^{-7}$ | 463/1082                  | 1.87 (1.55,2.25) | $4.0 \times 10^{-11}$ | 205/1082                  | 1.07 (0.85,1.34) | 0.58  |  |
| +             | + | 47/36                    | 2.84 (1.76,4.58) | $1.9 \times 10^{-5}$ | 29/36                     | 3.8 (2.19,6.58)  | $2.0 \times 10^{-6}$  | 18/36                     | 1.99 (1.05,3.76) | 0.030 |  |
| AP (95%CI), P |   | 0.2 (-0.32,0.73), p=0.44 |                  |                      | 0.07 (-0.59,0.74), p=0.83 |                  |                       | -1.11 (-2.5,0.29), p=0.12 |                  |       |  |

## Welding fume

|   |   |          |                  |       |          |               |       |          |                 |      |
|---|---|----------|------------------|-------|----------|---------------|-------|----------|-----------------|------|
| - | - | 430/1032 | 1.00 ref         |       | 251/1032 | 1.00 ref      |       | 179/1032 | 1.00 ref        |      |
| + | - | 22/29    | 1.95 (1.07,3.54) | 0.030 | 12/29    | 2.08 (1,4.32) | 0.050 | 10/29    | 1.7 (0.77,3.72) | 0.19 |



|                                                                               |   |                               |                  |                       |                                |                  |                       |                            |                  |       |
|-------------------------------------------------------------------------------|---|-------------------------------|------------------|-----------------------|--------------------------------|------------------|-----------------------|----------------------------|------------------|-------|
| -                                                                             | + | 668/1082                      | 1.51 (1.3,1.77)  | $1.4 \times 10^{-7}$  | 463/1082                       | 1.88 (1.56,2.26) | $2.6 \times 10^{-11}$ | 205/1082                   | 1.07 (0.85,1.34) | 0.58  |
| +                                                                             | + | 89/82                         | 2.65 (1.85,3.82) | $1.4 \times 10^{-7}$  | 62/82                          | 4.02 (2.64,6.12) | $8.5 \times 10^{-11}$ | 27/82                      | 1.38 (0.82,2.33) | 0.23  |
| AP (95%CI), P                                                                 |   | 0.07 (-0.44,0.58), p=0.78     |                  |                       | 0.26 (-0.18,0.71), p=0.25      |                  |                       | -0.27 (-1.36,0.81), p=0.62 |                  |       |
| Volatile sulphur compounds                                                    |   |                               |                  |                       |                                |                  |                       |                            |                  |       |
| -                                                                             | - | 430/1032                      | 1.00 ref         |                       | 251/1032                       | 1.00 ref         |                       | 179/1032                   | 1.00 ref         |       |
| +                                                                             | - | 42/97                         | 0.81 (0.54,1.22) | 0.31                  | 18/97                          | 0.64 (0.37,1.12) | 0.12                  | 24/97                      | 0.93 (0.55,1.55) | 0.77  |
| -                                                                             | + | 668/1082                      | 1.5 (1.28,1.74)  | $2.9 \times 10^{-7}$  | 463/1082                       | 1.84 (1.53,2.22) | $7.4 \times 10^{-11}$ | 205/1082                   | 1.06 (0.84,1.32) | 0.63  |
| +                                                                             | + | 126/94                        | 2.95 (2.14,4.06) | $3.2 \times 10^{-11}$ | 90/94                          | 4.21 (2.94,6.04) | $5.2 \times 10^{-15}$ | 36/94                      | 1.62 (1.02,2.56) | 0.040 |
| AP (95%CI), P                                                                 |   | -1.1 (-1.74,-0.46), p=0.00076 |                  |                       | -1.48 (-2.28,-0.67), p=0.00033 |                  |                       | -0.6 (-1.4,0.19), p=0.14   |                  |       |
| <b>Other agents in correlation with any of the sixteen independent agents</b> |   |                               |                  |                       |                                |                  |                       |                            |                  |       |
| Aliphatic and alicyclic hydrocarbon solvents                                  |   |                               |                  |                       |                                |                  |                       |                            |                  |       |
| -                                                                             | - | 430/1032                      | 1.00 ref         |                       | 251/1032                       | 1.00 ref         |                       | 179/1032                   | 1.00 ref         |       |
| +                                                                             | - | 16/27                         | 1.47 (0.77,2.8)  | 0.25                  | 11/27                          | 1.94 (0.93,4.06) | 0.080                 | 5/27                       | 0.94 (0.35,2.53) | 0.89  |
| -                                                                             | + | 668/1082                      | 1.51 (1.29,1.76) | $2.1 \times 10^{-7}$  | 463/1082                       | 1.86 (1.55,2.24) | $4.6 \times 10^{-11}$ | 205/1082                   | 1.06 (0.85,1.33) | 0.60  |
| +                                                                             | + | 48/35                         | 2.94 (1.82,4.74) | $9.7 \times 10^{-6}$  | 30/35                          | 3.73 (2.16,6.44) | $2.4 \times 10^{-6}$  | 18/35                      | 2.07 (1.09,3.91) | 0.030 |
| AP (95%CI), P                                                                 |   | 0.33 (-0.11,0.77), p=0.14     |                  |                       | 0.25 (-0.29,0.79), p=0.37      |                  |                       | -1.01 (-2.5,0.49), p=0.19  |                  |       |
| Animal dust                                                                   |   |                               |                  |                       |                                |                  |                       |                            |                  |       |
| -                                                                             | - | 430/1032                      | 1.00 ref         |                       | 251/1032                       | 1.00 ref         |                       | 179/1032                   | 1.00 ref         |       |
| +                                                                             | - | 39/86                         | 0.97 (0.64,1.46) | 0.87                  | 17/86                          | 0.77 (0.44,1.35) | 0.35                  | 22/86                      | 1.09 (0.65,1.85) | 0.74  |
| -                                                                             | + | 668/1082                      | 1.5 (1.28,1.75)  | $2.6 \times 10^{-7}$  | 463/1082                       | 1.85 (1.54,2.23) | $6.1 \times 10^{-11}$ | 205/1082                   | 1.06 (0.84,1.32) | 0.64  |
| +                                                                             | + | 92/95                         | 2.22 (1.6,3.07)  | $1.8 \times 10^{-6}$  | 63/95                          | 2.9 (2.4,2)      | $1.9 \times 10^{-8}$  | 29/95                      | 1.45 (0.9,2.33)  | 0.13  |
| AP (95%CI), P                                                                 |   | -0.5 (-1.03,0.03), p=0.066    |                  |                       | -0.69 (-1.3,-0.09), p=0.025    |                  |                       | 0.2 (-0.32,0.73), p=0.45   |                  |       |
| Aromatic hydrocarbon solvents                                                 |   |                               |                  |                       |                                |                  |                       |                            |                  |       |
| -                                                                             | - | 430/1032                      | 1.00 ref         |                       | 251/1032                       | 1.00 ref         |                       | 179/1032                   | 1.00 ref         |       |
| +                                                                             | - | 18/29                         | 1.49 (0.8,2.76)  | 0.21                  | 14/29                          | 2.26 (1.15,4.45) | 0.020                 | 4/29                       | 0.64 (0.21,1.88) | 0.41  |
| -                                                                             | + | 668/1082                      | 1.51 (1.29,1.76) | $1.9 \times 10^{-7}$  | 463/1082                       | 1.87 (1.55,2.24) | $4.3 \times 10^{-11}$ | 205/1082                   | 1.06 (0.85,1.33) | 0.60  |
| +                                                                             | + | 54/44                         | 2.56 (1.64,4)    | $3.6 \times 10^{-5}$  | 33/44                          | 3.34 (2.5,5.9)   | $4.4 \times 10^{-6}$  | 21/44                      | 1.78 (0.98,3.22) | 0.060 |
| AP (95%CI), P                                                                 |   | 0.22 (-0.26,0.7), p=0.37      |                  |                       | 0.06 (-0.56,0.69), p=0.84      |                  |                       | -1.02 (-2.2,0.17), p=0.092 |                  |       |
| Benzo(a)pyrene                                                                |   |                               |                  |                       |                                |                  |                       |                            |                  |       |
| -                                                                             | - | 430/1032                      | 1.00 ref         |                       | 251/1032                       | 1.00 ref         |                       | 179/1032                   | 1.00 ref         |       |
| +                                                                             | - | 51/102                        | 1.2 (0.82,1.77)  | 0.35                  | 34/102                         | 1.62 (1.03,2.55) | 0.040                 | 17/102                     | 0.75 (0.42,1.33) | 0.32  |
| -                                                                             | + | 668/1082                      | 1.51 (1.29,1.76) | $1.6 \times 10^{-7}$  | 463/1082                       | 1.85 (1.54,2.23) | $5.2 \times 10^{-11}$ | 205/1082                   | 1.07 (0.85,1.34) | 0.56  |
| +                                                                             | + | 212/204                       | 2.48 (1.91,3.22) | $1.1 \times 10^{-11}$ | 142/204                        | 3.33 (2.45,4.53) | $1.9 \times 10^{-14}$ | 70/204                     | 1.57 (1.09,2.28) | 0.020 |

|                       |   |                              |                  |                       |                              |                  |                       |                              |                  |       |
|-----------------------|---|------------------------------|------------------|-----------------------|------------------------------|------------------|-----------------------|------------------------------|------------------|-------|
| AP (95%CI), P         |   | 0.31 (0.08,0.54), p=0.0076   |                  |                       | 0.26 (-0.01,0.52), p=0.059   |                  |                       | -0.71 (-1.34,-0.07), p=0.03  |                  |       |
| Chromium              |   |                              |                  |                       |                              |                  |                       |                              |                  |       |
| -                     | - | 430/1032                     | 1.00 ref         |                       | 251/1032                     | 1.00 ref         |                       | 179/1032                     | 1.00 ref         |       |
| +                     | - | 13/41                        | 0.68 (0.35,1.31) | 0.25                  | 11/41                        | 1.06 (0.52,2.14) | 0.88                  | 2/41                         | 0.22 (0.05,0.95) | 0.040 |
| -                     | + | 668/1082                     | 1.52 (1.3,1.77)  | 1.3×10 <sup>-7</sup>  | 463/1082                     | 1.88 (1.56,2.26) | 2.8×10 <sup>-11</sup> | 205/1082                     | 1.07 (0.85,1.34) | 0.56  |
| +                     | + | 56/51                        | 2.69 (1.76,4.12) | 5.1×10 <sup>-6</sup>  | 36/51                        | 3.55 (2.18,5.77) | 3.4×10 <sup>-7</sup>  | 20/51                        | 1.89 (1.05,3.4)  | 0.030 |
| AP (95%CI), P         |   | -0.99 (-1.78,-0.19), p=0.015 |                  |                       | 0.46 (0.13,0.78), p=0.0059   |                  |                       | -1.49 (-2.6,-0.38), p=0.0085 |                  |       |
| Diesel engine exhaust |   |                              |                  |                       |                              |                  |                       |                              |                  |       |
| -                     | - | 430/1032                     | 1.00 ref         |                       | 251/1032                     | 1.00 ref         |                       | 179/1032                     | 1.00 ref         |       |
| +                     | - | 61/119                       | 1.13 (0.79,1.6)  | 0.51                  | 39/119                       | 1.43 (0.95,2.16) | 0.090                 | 22/119                       | 0.77 (0.46,1.3)  | 0.33  |
| -                     | + | 668/1082                     | 1.5 (1.28,1.74)  | 2.8×10 <sup>-7</sup>  | 463/1082                     | 1.83 (1.52,2.2)  | 1.2×10 <sup>-10</sup> | 205/1082                     | 1.06 (0.85,1.33) | 0.59  |
| +                     | + | 238/218                      | 2.42 (1.89,3.09) | 2.3×10 <sup>-12</sup> | 161/218                      | 3.3 (2.48,4.4)   | 3.5×10 <sup>-16</sup> | 77/218                       | 1.46 (1.03,2.07) | 0.030 |
| AP (95%CI), P         |   | 0.33 (0.12,0.54), p=0.002    |                  |                       | 0.32 (0.09,0.54), p=0.007    |                  |                       | -0.59 (-1.17,-0.01), p=0.048 |                  |       |
| Hardwood dust         |   |                              |                  |                       |                              |                  |                       |                              |                  |       |
| -                     | - | 430/1032                     | 1.00 ref         |                       | 251/1032                     | 1.00 ref         |                       | 179/1032                     | 1.00 ref         |       |
| +                     | - | 44/81                        | 1.3 (0.86,1.97)  | 0.22                  | 23/81                        | 1.35 (0.8,2.28)  | 0.26                  | 21/81                        | 1.19 (0.68,2.06) | 0.55  |
| -                     | + | 668/1082                     | 1.51 (1.29,1.76) | 1.6×10 <sup>-7</sup>  | 463/1082                     | 1.86 (1.55,2.24) | 4.1×10 <sup>-11</sup> | 205/1082                     | 1.07 (0.85,1.34) | 0.57  |
| +                     | + | 115/116                      | 2.33 (1.69,3.2)  | 2.2×10 <sup>-7</sup>  | 74/116                       | 3.08 (2.12,4.48) | 4.0×10 <sup>-9</sup>  | 41/116                       | 1.53 (0.98,2.38) | 0.060 |
| AP (95%CI), P         |   | 0.22 (-0.08,0.53), p=0.15    |                  |                       | 0.28 (-0.03,0.59), p=0.076   |                  |                       | 0.18 (-0.33,0.69), p=0.49    |                  |       |
| Herbicides            |   |                              |                  |                       |                              |                  |                       |                              |                  |       |
| -                     | - | 430/1032                     | 1.00 ref         |                       | 251/1032                     | 1.00 ref         |                       | 179/1032                     | 1.00 ref         |       |
| +                     | - | 21/58                        | 0.77 (0.45,1.32) | 0.35                  | 6/58                         | 0.42 (0.17,1.02) | 0.050                 | 15/58                        | 1.03 (0.55,1.94) | 0.92  |
| -                     | + | 668/1082                     | 1.51 (1.3,1.76)  | 1.5×10 <sup>-7</sup>  | 463/1082                     | 1.87 (1.56,2.25) | 3.2×10 <sup>-11</sup> | 205/1082                     | 1.07 (0.85,1.34) | 0.58  |
| +                     | + | 48/52                        | 2.37 (1.53,3.69) | 1.3×10 <sup>-4</sup>  | 35/52                        | 3.55 (2.17,5.83) | 5.0×10 <sup>-7</sup>  | 13/52                        | 1.19 (0.6,2.34)  | 0.62  |
| AP (95%CI), P         |   | -0.72 (-1.45,0.01), p=0.052  |                  |                       | -1.21 (-2.15,-0.27), p=0.012 |                  |                       | 0.08 (-0.72,0.87), p=0.85    |                  |       |
| Insecticides          |   |                              |                  |                       |                              |                  |                       |                              |                  |       |
| -                     | - | 430/1032                     | 1.00 ref         |                       | 251/1032                     | 1.00 ref         |                       | 179/1032                     | 1.00 ref         |       |
| +                     | - | 14/20                        | 1.45 (0.7,2.98)  | 0.32                  | 9/20                         | 1.74 (0.75,4.01) | 0.20                  | 5/20                         | 1.1 (0.39,3.11)  | 0.85  |
| -                     | + | 668/1082                     | 1.51 (1.29,1.76) | 1.7×10 <sup>-7</sup>  | 463/1082                     | 1.87 (1.55,2.25) | 4.1×10 <sup>-11</sup> | 205/1082                     | 1.07 (0.85,1.34) | 0.57  |
| +                     | + | 36/22                        | 3.95 (2.25,6.91) | 1.6×10 <sup>-6</sup>  | 25/22                        | 5.27 (2.85,9.75) | 1.2×10 <sup>-7</sup>  | 11/22                        | 2.61 (1.2,5.67)  | 0.020 |
| AP (95%CI), P         |   | 0.5 (0.13,0.88), p=0.0088    |                  |                       | 0.51 (0.11,0.91), p=0.013    |                  |                       | 0.55 (0.1,1), p=0.051        |                  |       |
| Iron                  |   |                              |                  |                       |                              |                  |                       |                              |                  |       |
| -                     | - | 430/1032                     | 1.00 ref         |                       | 251/1032                     | 1.00 ref         |                       | 179/1032                     | 1.00 ref         |       |

|                                  |               |   |                               |                  |                       |                              |                  |                       |                               |                  |                      |
|----------------------------------|---------------|---|-------------------------------|------------------|-----------------------|------------------------------|------------------|-----------------------|-------------------------------|------------------|----------------------|
|                                  | +             | - | 86/157                        | 1.27 (0.93,1.74) | 0.14                  | 55/157                       | 1.55 (1.07,2.24) | 0.020                 | 31/157                        | 0.93 (0.59,1.47) | 0.75                 |
|                                  | -             | + | 668/1082                      | 1.52 (1.3,1.77)  | $1.1 \times 10^{-7}$  | 463/1082                     | 1.86 (1.55,2.23) | $3.7 \times 10^{-11}$ | 205/1082                      | 1.08 (0.86,1.35) | 0.53                 |
|                                  | +             | + | 323/296                       | 2.58 (2.04,3.25) | $1.5 \times 10^{-15}$ | 217/296                      | 3.36 (2.55,4.42) | $4.6 \times 10^{-18}$ | 106/296                       | 1.71 (1.23,2.37) | $1.3 \times 10^{-3}$ |
|                                  | AP (95%CI), P |   | 0.31 (0.12,0.5), p=0.0014     |                  |                       | 0.28 (0.07,0.5), p=0.0083    |                  |                       | -0.65 (-1.24,-0.06), p=0.03   |                  |                      |
| Manmade mineral fibres           |               |   |                               |                  |                       |                              |                  |                       |                               |                  |                      |
|                                  | -             | - | 430/1032                      | 1.00 ref         |                       | 251/1032                     | 1.00 ref         |                       | 179/1032                      | 1.00 ref         |                      |
|                                  | +             | - | 29/48                         | 1.46 (0.87,2.43) | 0.15                  | 16/48                        | 1.75 (0.93,3.29) | 0.080                 | 13/48                         | 1.09 (0.55,2.18) | 0.80                 |
|                                  | -             | + | 668/1082                      | 1.51 (1.29,1.76) | $1.8 \times 10^{-7}$  | 463/1082                     | 1.87 (1.55,2.25) | $3.6 \times 10^{-11}$ | 205/1082                      | 1.06 (0.85,1.33) | 0.61                 |
|                                  | +             | + | 106/91                        | 2.9 (2.03,4.13)  | $4.3 \times 10^{-9}$  | 69/91                        | 4.23 (2.78,6.43) | $1.4 \times 10^{-11}$ | 37/91                         | 1.68 (1.03,2.74) | 0.040                |
|                                  | AP (95%CI), P |   | 0.32 (0.01,0.63), p=0.043     |                  |                       | 0.38 (0.07,0.7), p=0.018     |                  |                       | 0.31 (-0.19,0.82), p=0.23     |                  |                      |
| Other organic solvents           |               |   |                               |                  |                       |                              |                  |                       |                               |                  |                      |
|                                  | -             | - | 430/1032                      | 1.00 ref         |                       | 251/1032                     | 1.00 ref         |                       | 179/1032                      | 1.00 ref         |                      |
|                                  | +             | - | 16/27                         | 1.46 (0.77,2.8)  | 0.25                  | 11/27                        | 1.94 (0.92,4.06) | 0.080                 | 5/27                          | 0.93 (0.35,2.52) | 0.89                 |
|                                  | -             | + | 668/1082                      | 1.51 (1.29,1.76) | $2.0 \times 10^{-7}$  | 463/1082                     | 1.87 (1.55,2.25) | $4.4 \times 10^{-11}$ | 205/1082                      | 1.06 (0.85,1.33) | 0.59                 |
|                                  | +             | + | 48/36                         | 2.84 (1.77,4.56) | $1.6 \times 10^{-5}$  | 30/36                        | 3.6 (2.09,6.21)  | $3.7 \times 10^{-6}$  | 18/36                         | 1.97 (1.05,3.72) | 0.040                |
|                                  | AP (95%CI), P |   | 0.31 (-0.15,0.76), p=0.19     |                  |                       | 0.22 (-0.33,0.78), p=0.43    |                  |                       | -0.92 (-2.36,0.52), p=0.21    |                  |                      |
| Plant dust                       |               |   |                               |                  |                       |                              |                  |                       |                               |                  |                      |
|                                  | -             | - | 430/1032                      | 1.00 ref         |                       | 251/1032                     | 1.00 ref         |                       | 179/1032                      | 1.00 ref         |                      |
|                                  | +             | - | 36/88                         | 0.76 (0.49,1.18) | 0.22                  | 13/88                        | 0.51 (0.27,0.96) | 0.040                 | 23/88                         | 0.93 (0.54,1.57) | 0.77                 |
|                                  | -             | + | 668/1082                      | 1.5 (1.29,1.75)  | $2.1 \times 10^{-7}$  | 463/1082                     | 1.86 (1.54,2.23) | $5.0 \times 10^{-11}$ | 205/1082                      | 1.06 (0.85,1.33) | 0.61                 |
|                                  | +             | + | 100/94                        | 2.44 (1.75,3.4)  | $1.7 \times 10^{-7}$  | 72/94                        | 3.57 (2.45,5.19) | $3.3 \times 10^{-11}$ | 28/94                         | 1.29 (0.78,2.13) | 0.32                 |
|                                  | AP (95%CI), P |   | -0.78 (-1.34,-0.22), p=0.0065 |                  |                       | -1.18 (-1.9,-0.47), p=0.0012 |                  |                       | -0.29 (-1.01,0.44), p=0.44    |                  |                      |
| Polycyclic aromatic hydrocarbons |               |   |                               |                  |                       |                              |                  |                       |                               |                  |                      |
|                                  | -             | - | 430/1032                      | 1.00 ref         |                       | 251/1032                     | 1.00 ref         |                       | 179/1032                      | 1.00 ref         |                      |
|                                  | +             | - | 59/127                        | 1.09 (0.76,1.55) | 0.65                  | 41/127                       | 1.47 (0.97,2.21) | 0.070                 | 18/127                        | 0.65 (0.38,1.13) | 0.13                 |
|                                  | -             | + | 668/1082                      | 1.51 (1.29,1.76) | $1.5 \times 10^{-7}$  | 463/1082                     | 1.85 (1.54,2.23) | $4.9 \times 10^{-11}$ | 205/1082                      | 1.07 (0.85,1.34) | 0.56                 |
|                                  | +             | + | 249/229                       | 2.57 (2.01,3.3)  | $9.6 \times 10^{-14}$ | 165/229                      | 3.37 (2.52,4.51) | $3.6 \times 10^{-16}$ | 84/229                        | 1.71 (1.21,2.42) | $2.6 \times 10^{-3}$ |
|                                  | AP (95%CI), P |   | 0.38 (0.19,0.57), p=0.000095  |                  |                       | 0.31 (0.08,0.54), p=0.007    |                  |                       | -0.92 (-1.55,-0.29), p=0.0041 |                  |                      |
| Stone and concrete               |               |   |                               |                  |                       |                              |                  |                       |                               |                  |                      |
|                                  | -             | - | 430/1032                      | 1.00 ref         |                       | 251/1032                     | 1.00 ref         |                       | 179/1032                      | 1.00 ref         |                      |
|                                  | +             | - | 98/173                        | 1.26 (0.93,1.69) | 0.14                  | 57/173                       | 1.43 (1,2.06)    | 0.050                 | 41/173                        | 1.04 (0.69,1.57) | 0.86                 |
|                                  | -             | + | 668/1082                      | 1.49 (1.28,1.73) | $3.6 \times 10^{-7}$  | 463/1082                     | 1.82 (1.52,2.19) | $1.2 \times 10^{-10}$ | 205/1082                      | 1.05 (0.84,1.32) | 0.65                 |
|                                  | +             | + | 369/321                       | 2.56 (2.04,3.21) | $2.6 \times 10^{-16}$ | 241/321                      | 3.32 (2.55,4.33) | $7.4 \times 10^{-19}$ | 128/321                       | 1.69 (1.24,2.31) | $9.2 \times 10^{-4}$ |

| AP (95%CI), P |   | 0.32 (0.14,0.5), p=0.00044 |                  |                      | 0.32 (0.13,0.51), p=0.0011 |                  |                       | 0.35 (0.07,0.64), p=0.015 |                  |       |
|---------------|---|----------------------------|------------------|----------------------|----------------------------|------------------|-----------------------|---------------------------|------------------|-------|
| Wood dust     |   |                            |                  |                      |                            |                  |                       |                           |                  |       |
| -             | - | 430/1032                   | 1.00 ref         |                      | 251/1032                   | 1.00 ref         |                       | 179/1032                  | 1.00 ref         |       |
| +             | - | 45/82                      | 1.31 (0.87,1.98) | 0.20                 | 24/82                      | 1.39 (0.83,2.34) | 0.21                  | 21/82                     | 1.17 (0.67,2.03) | 0.58  |
| -             | + | 668/1082                   | 1.51 (1.29,1.76) | 1.6×10 <sup>-7</sup> | 463/1082                   | 1.86 (1.55,2.24) | 4.0×10 <sup>-11</sup> | 205/1082                  | 1.07 (0.85,1.34) | 0.58  |
| +             | + | 117/118                    | 2.33 (1.7,3.2)   | 1.6×10 <sup>-7</sup> | 75/118                     | 3.06 (2.11,4.44) | 3.5×10 <sup>-9</sup>  | 42/118                    | 1.55 (1,2.4)     | 0.050 |
| AP (95%CI), P |   | 0.22 (-0.08,0.52), p=0.16  |                  |                      | 0.26 (-0.05,0.58), p=0.1   |                  |                       | 0.2 (-0.29,0.69), p=0.42  |                  |       |

### Supplementary Methods

During the period of 1996-2017, with a response rate of 94% in cases and 77% in controls, 4,251 cases and 6,934 controls participated in EIRA. The mean duration from symptom onset to RA diagnosis was approximately 10 months (1). Specifically, a previous study on inclusion levels and potential bias in recruitment of cases and controls has shown that little bias exists in our EIRA materials (2). Information regarding demographics, socioeconomic status, work history, environmental exposures and lifestyle was collected by self-administrated questionnaires with extensive questions covering those aspects. Blood samples were collected for antibody test and genotyping. Anti-citrulline antibodies were assayed among cases using the Immunoscan-RA Mark2 ELISA test (Euro-Diagnostica, Malmo, Sweden). An antibody level exceeding 25 units/ml was defined as ACPA-positive RA, otherwise ACPA-negative RA. Genotyping was performed based on the Illumina ImmunoChip primarily targeting the known immunity-related genes (Immuno-Chip) or a 600K Illumina global screening array. All genetic data were imputed to the 1000 Genome Phase3 v5 reference panel and had undergone thorough quality controls (SNP genotyping call rate > 95% in both cases and controls; minor allele frequency > 1% in both cases and controls; Hardy-Weinberg equilibrium P-value >  $1 \times 10^{-5}$  in controls; in addition, subjects with > 5% missing genotypes, evidence of relatedness or non-European ancestry were excluded). Population stratification was examined using the principal component approach (PCA). Outliers were identified and deleted through a five-round trimming step that was iteratively executed.

### Occupational inhalable agents

For each participant, we retrieved their employment history (job titles, start year and end year) for working periods prior to the index year. We estimated the probability of exposure to occupational inhalable agents for each of their jobs according to a job-exposure matrix (JEM) developed for working conditions in Sweden which contained assessment of prevalence and concentration of 47 inhalable agents. We then calculated a semi-quantitative exposure through weighting the working years (years from start to end of each job, single or multiple jobs) by prevalence and concentration of the corresponding agents. To reduce potential misclassification, only common agents with prevalence > 50% in the respective job category were retained in the calculation. We next summed up the semi-quantitative exposure per agent per participant. These exposures were classified into binary variables as ever exposed *v.s.* never exposed (to a particular agent) with zero as cut-off.

### Genetic risk score and HLA-SE alleles

The hitherto largest GWAS for RA was conducted involving >100,000 subjects of European and Asian ancestries, including participants from EIRA (4). We obtained the genetic summary statistics for the European-ancestral subpopulations from this GWAS and meta-analyzed these summary statistics after excluding participants from EIRA using a fix-effect model in METAL, which resulted in 13,264 RA cases and 42,879 controls. We then computed the genetic risk score (GRS) for EIRA participants using

LDpred2 software with this RA GWAS summary statistics. LDpred2 is a Bayesian-based method that estimates posterior mean effect sizes from GWAS summary statistics and constructs GRS by summing the RA-risk alleles across the whole genome and weighting each risk allele by its posterior mean effect size (5). On the other hand, genotyping for HLA-SE alleles in EIRA was performed by SSP-PCR (8) or by imputation with SNP2HLA.

### **Binary smoking status vs. pack-years of smoking as a covariate**

EIRA collects smoking-related data in two parts – first asking each participant’s smoking status (never vs. ever) and subsequently asking those who answered “ever or currently smoking” for their smoking intensity (number of cigarettes per day) during different periods of time, allowing us to calculate the dose of smoking as number of pack-years. It is perhaps not surprising, due to difficulties in recall, that the quantitative data on dose (pack-years of smoking) had around 700 more missing observations than the qualitative data on status (never vs. ever smoking). To obtain the maximum sample size available for this study, we decided to use binary smoking status (never vs. ever) in main analysis. Since pack-years of smoking is considered a more precise measure of smoking, here we performed a separate analysis adjusting for pack-years of smoking (continuous variable). However, such adjustment did not alter our results substantially. As shown in **Supplementary Figure 2**, all estimates remained largely unchanged in both the direction and the magnitude across two different ways of adjustments. Nevertheless, significance shrank slightly possibly due to exclusion of additional missing observations.

### **Statistical analysis**

To account for potential correlations among inhalable agents, we calculated Pearson’s correlation coefficients pair-wising all 32 agents. We set the significant P-threshold as  $1.0 \times 10^{-4}$  ( $0.05/496$  pairs) and the correlation coefficient threshold as 0.40 (moderate correlation). Then a “clumping” strategy was performed to obtain independent collections of inhalable agents. Briefly, we sorted agents on their association P-values with RA and arranged agents by P-values from the smallest to the largest. We took the first (the most significant) agent as index agent and clumped any agents correlated with the index agent on a correlation coefficient  $> 0.40$  and a  $P_{\text{correlation}} < 1.0 \times 10^{-4}$ . We iteratively repeated the procedure until no more agent was removed.

To explore the G×E or E×E interaction effect among inhalable agents, smoking and genetic predisposition (high GRS or carrying HLA-SE alleles), we estimated the additive interaction defined as departure from the additivity of effects, where sufficient cause interaction occurs when the joint effect of two contributory causes exceeds the sum of their independent effects (9). We calculated effects (here, odds ratios, ORs) comparing double-exposed individuals ( $OR_{11}$ ) and single-exposed individuals ( $OR_{10}$  and  $OR_{01}$ ) with the reference group ( $OR_{00}$  non-exposed individuals). We subsequently calculated attributable proportion due to interaction (AP) using the formula  $AP = (OR_{11} - OR_{10} - OR_{01} + 1) / OR_{11}$ . AP is

the proportion of the incidence among individuals exposed to two interacting factors that is attributable to the interaction *per se*, thus an AP greater than 0 indicates presence of interaction (10).

**Reference**

1. Ilar A, Alfredsson L, Wiebert P, Klareskog L, Bengtsson C. Occupation and Risk of Developing Rheumatoid Arthritis: Results From a Population-Based Case-Control Study. *Arthritis care & research*. 2018;70(4):499-509.
2. Bengtsson C, Berglund A, Serra ML, Nise L, Nordmark B, Klareskog L, et al. Non-participation in EIRA: a population-based case-control study of rheumatoid arthritis. *Scandinavian Journal of Rheumatology*. 2010;39(4):344-6.
3. Wiebert P, Lönn M, Fremling K, Feychting M, Sjögren B, Nise G, et al. Occupational exposure to particles and incidence of acute myocardial infarction and other ischaemic heart disease. *Occupational and environmental medicine*. 2012;69(9):651-7.
4. Okada Y, Wu D, Trynka G, Raj T, Terao C, Ikari K, et al. Genetics of rheumatoid arthritis contributes to biology and drug discovery. *Nature*. 2014;506(7488):376-81.
5. Privé F, Arbel J, Vilhjálmsson BJ. LDpred2: better, faster, stronger. *Bioinformatics*. 2020;36(22-23):5424-31.
6. Raychaudhuri S, Sandor C, Stahl EA, Freudenberg J, Lee HS, Jia X, et al. Five amino acids in three HLA proteins explain most of the association between MHC and seropositive rheumatoid arthritis. *Nat Genet*. 2012;44(3):291-6.
7. Gregersen PK, Silver J, Winchester RJ. The shared epitope hypothesis. an approach to understanding the molecular genetics of susceptibility to rheumatoid arthritis. *Arthritis & Rheumatism*. 1987;30(11):1205-13.
8. Olerup O, Zetterquist H. HLA-DR typing by PCR amplification with sequence-specific primers (PCR-SSP) in 2 hours: an alternative to serological DR typing in clinical practice including donor-recipient matching in cadaveric transplantation. *Tissue Antigens*. 1992;39(5):225-35.
9. Rothman KJ, Greenland S, Walker AM. Concepts of interaction. *Am J Epidemiol*. 1980;112(4):467-70.
10. Andersson T, Alfredsson L, Källberg H, Zdravkovic S, Ahlbom A. Calculating measures of biological interaction. *European journal of epidemiology*. 2005;20(7):575-9.
